# Supplementary material for: Studying the effects of sea cucumber ovum powder on nonalcoholic fatty liver disease by proteomics techniques in a rat model
Source: Royal Society of Chemistry journal article supplement (doi:10.1039/d0fo00741b), 2020-01-01
Supplement: d0fo00741b1.xlsx [file d0fo00741b1.xlsx]

## Sheet: 19P0621-(2)_Proteins
Table S1 5922 identified proteins in rat livers from BCG, MCG, LDG and HDG.
Uniprot ID	BCG-1	BCG-2	MCG-1	MCG-2	LDG-1	LDG-2	HDG-1	HDG-2
A0A023IKJ0	98.9	98.2	113.3	113.6	90.1	83.5	95.4	95.6
A0A023ILN9	104.9	101.5	99.1	108.4	85.8	91.3	100.6	104.6
A0A023IM45	106.3	95.4	101.5	94.6	88.7	91.8	100.7	100
A0A023IM54	90.9	106.8	108.4	109.9	90.8	90	99.7	96.8
A0A096MIS5	97.8	111.4	97.6	91.9	93.3	85.6	104.1	104.7
A0A096MIV5	104.1	86.1	105.6	103.9	104.5	95.4	97.3	98.3
A0A096MIX2	112.7	94.3	104.7	100.4	92.5	87.5	96.2	98.9
A0A096MIZ1	122.7	91.8	88	102.5	82.8	102.6	95.3	91.3
A0A096MJ11	107.5	104	98.7	102.8	88.3	92.4	104.5	103.4
A0A096MJ28	104.9	109.5	100.3	93.6	92	97.7	119.6	110.1
A0A096MJ38	88	110.9	78.2	96.2	72	76.3	118.8	151.9
A0A096MJ99	130.4	95.8	81.9	106.8	102.1	80.9	101.8	104.5
A0A096MJB5
A0A096MJI4	99.6	90.9	101.6	120.2	96.3	92.6	106	97
A0A096MJN4	90.2	106.8	104.7	96.8	99.1	96	100.8	108.2
A0A096MJP9	103.7	103.8	88.2	131.3	87.3	89.6	87	88.6
A0A096MJR6	71.3	74.9	104.3	91	112.9	134.4	80.6	126.7
A0A096MJW8	105.8	97.4	103.7	98.6	101.1	97.9	103.7	95.9
A0A096MJY6	113.6	105.4	86.6	100.9	97.5	108.1	97.1	95.6
A0A096MJZ2	107.7	95.7	97.5	96.4	96.5	96.6	101.7	102.1
A0A096MK18	102.1	93	98.7	96.4	96.4	87.8	88.7	94
A0A096MK30	90.5	93.6	127.2	118.6	90.7	91.8	99	95.2
A0A096MK80	66.9	71.2	65	128.3	122.6	129.2	108.7	95.4
A0A096MKB0	108.9	98	88.2	91	102.1	101.9	101.7	100.3
A0A096MKB1
A0A096MKC0	93.6	97.7	92.5	99	91.1	86.7	104.3	104
A0A096MKE9	107.6	93.7	93.1	100.4	92.5	91.3	93.2	102.9
A0A096MKG5	112.6	97.1	98.7	96.1	100.3	98	94.9	97.6
A0A096MKH2	93.6	94.4	106.8	100.3	112.1	110	101.7	99.2
A0A096P6L8	87.2	93.6	104.8	104.8	90.2	97.7	109.7	105.8
A0A096P6L9	96.6	98.9	85	103.1	94.1	86.4	107.4	103.3
A0A096XKT2	100	105.6	89.2	96.2	94.5	107.6	106.3	98.4
A0A0A0MP80
A0A0A0MXW1	97	96.7	111.8	94.7	112.2	96.6	100	97.5
A0A0A0MXX5	93.3	87.3	89.4	93.3	109.9	89.9	104	119.9
A0A0A0MXY3	95.6	97.5	107.2	81.7	93.1	84.5	132.3	100
A0A0A0MXZ0	106.2	84.8	104.5	106.6	108.3	98.2	91.8	89.1
A0A0A0MY00	101.7	94.3	93.2	96.3	116.8	88.2	91.2	118.7
A0A0A0MY01	72.7	94.1	128	78.9	93.5	112.8	149.7	128.7
A0A0A0MY07	102.4	100.3	96.4	96.7	99.7	100.6	99.8	103.1
A0A0A0MY09	92.4	96.2	106.6	104.9	106.8	100.6	102.5	96.3
A0A0A0MY22	114	83.2	95.3	102.7	99.7	97.7	90.3	107
A0A0A0MY43	193.4	81.7	89.9	118.3	101.1	96.6	92	78.4
A0A0A1FZ38	107.9	96.6	92	111.3	92.4	94.9	96.1	110.3
A0A0A1FZN8	131.4	84.4	83.9	99.5	99.4	99	106.8	110.3
A0A0A1G491	70.3	109.9	131.2	94.3	89.4	88	116.4	96.2
A0A0C5AMK0
A0A0G2JSG6	99.4	98.1	92.6	104.8	114.7	103.3	97.7	99.6
A0A0G2JSH2	91.2	96.4	95.9	104.9	109.4	105	104.5	101.2
A0A0G2JSH5	95	123.5	64.1	76.1	114.1	124.3	85	131.9
A0A0G2JSH9	94.4	102.4	105.4	104.9	94.4	100	100.8	109.8
A0A0G2JSI0	103.2	89.4	91.7	104.4	106.4	104.8	103.6	100
A0A0G2JSI1	104.1	106.6	92.5	95.7	90.9	97	100.1	104.2
A0A0G2JSI4	99.8	102.8	105	117.3	77.7	88.7	101.4	110.5
A0A0G2JSJ0	94.6	90.8	73.9	100.7	83.8	103	117.8	114.7
A0A0G2JSJ8	98.8	101.9	103.8	101.5	89.2	87.1	94.4	95.3
A0A0G2JSK5	90.4	94.1	99.5	100.8	101.6	97.3	102.5	101.6
A0A0G2JSK9	147.3	152.6	79.7	87.7	81.4	91.8	77.6	84.6
A0A0G2JSL0	96.2	91.4	95.7	96.4	105.4	106.9	104.9	95.9
A0A0G2JSL4	104.1	102.8	125.6	95.1	82.4	77.8	91.4	98
A0A0G2JSL7	100.3	104.4	104.5	102	90.8	91.4	96.1	101.2
A0A0G2JSM2	116.7	121.1	83.9	101.5	86.9	91.7	93.3	95.2
A0A0G2JSM4	101.8	93.2	100.7	119.9	88.5	93.2	98.3	91.9
A0A0G2JSM7	107.1	96.4	97.5	103.4	92	89.9	102.9	103.1
A0A0G2JSN3	92	70.6	77.4	101.8	111.1	112.5	87.2	114.8
A0A0G2JSN9	81.1	77.7	121.3	111.2	99.9	111.4	96.9	92.5
A0A0G2JSP8	85.4	82.9	72.8	107.9	111.1	101.5	116.4	129.4
A0A0G2JSQ0	117.4	103.8	109.1	89.8	110.6	98.7	85.1	94
A0A0G2JSQ3	99.8	88.9	123.2	107.8	105.9	105.2	92.6	81.4
A0A0G2JSQ4	79	76.9	122.5	93.9	124	105.5	114.2	97.7
A0A0G2JSQ6	76.5	129.8	114.8	102.6	82.3	86.6	107.9	96
A0A0G2JSR0	97.2	99.3	96.6	102.4	100	96.8	102.4	102.1
A0A0G2JSR4	100	90.5	99.8	95.4	98	90.7	107	98.4
A0A0G2JSR7	102.8	111.1	112.7	98.1	95.6	88.7	95.7	90.5
A0A0G2JSR8	87.1	128.9	118.2	96.8	90.2	114.3	99.3	107.6
A0A0G2JSR9	96.3	110.7	99.5	91.4	84.7	88.6	94.9	112.8
A0A0G2JSS1	114	108.8	93.1	107.6	84.5	81.7	93.7	98.9
A0A0G2JSS3	143.7	73.8	79.7	96.4	87.4	94.1	88.3	98.4
A0A0G2JSS8	96.5	99.7	107	94.6	108.8	106.1	103	97.5
A0A0G2JSS9	86.2	99.8	100.4	100.5	105.1	110	107	104.7
A0A0G2JST3	99.4	78	87.7	101.7	160.6	74.6	104.4	83.8
A0A0G2JSU4	106.9	119	92.6	103.3	96.2	98.9	104.8	106.3
A0A0G2JSU8	93.4	105.5	89.8	105.5	100	102.2	107	107.9
A0A0G2JSV0	97	100.6	105.6	99.3	110.3	100.8	98.8	101.1
A0A0G2JSV3	105.7	95.4	93.9	101.4	99.9	101.2	101.9	93.6
A0A0G2JSV5	106.4	105.5	101.4	95.4	102.4	100.2	96.3	97.1
A0A0G2JSV6	91.7	128.5	87.3	96.9	77.6	100	97.1	135.9
A0A0G2JSW1	123.3	102.5	81.4	91.5	87.5	82.8	104.3	104.5
A0A0G2JSW3	86.2	128.6	87.5	92.3	80.9	96.7	101.5	143.2
A0A0G2JSY3	107.5	111	95.5	99.2	101.7	98.7	95.2	95.4
A0A0G2JSZ5	88.9	90.3	112.7	100.4	108.5	98.3	102.1	96.4
A0A0G2JSZ9	100.5	113.1	108.7	106.1	101.7	99.5	100.6	101.5
A0A0G2JT06	117.7	92.6	95	113.3	96.2	92.3	110.4	99.3
A0A0G2JT33	99.9	105.1	122	117.2	80.5	83	96.2	96.6
A0A0G2JT43	97.2	88	112.6	107.9	122.7	125	90.4	81.6
A0A0G2JT58	68.6	90.7	92.6	82.7	106.6	98.7	86.7	93.3
A0A0G2JT62	120.1	105.1	89.4	99.2	82.9	89.7	99.5	104.3
A0A0G2JT90	91.4	92.5	85.5	94.1	91.4	102.1	115.7	98.2
A0A0G2JT93	104	94.4	103.3	103	95.9	96.9	101.6	102.1
A0A0G2JT98	82.9	76	112.3	97.6	139.4	132.7	91.5	93.9
A0A0G2JTA0	88.1	84.2	95.3	96.9	110.4	110.2	113	104.8
A0A0G2JTA1	126.7	89.5	103	80.5	87.7	94.8	81.4	88.8
A0A0G2JTB5
A0A0G2JTB7	96.4	115.8	111.4	96.9	95.5	91.7	99.5	94.7
A0A0G2JTD1	102.3	97.3	94.6	109.5	87.5	91.4	98.5	91.8
A0A0G2JTF5
A0A0G2JTF6	90.7	117.9	107.3	117.1	92.6	88.5	97.1	103.1
A0A0G2JTG7	113.8	81.1	100.2	97.1	103.4	98.4	88.3	93
A0A0G2JTH1	100.1	80.8	71.3	97.7	69	65.5	92.8	97.3
A0A0G2JTH4	96.6	90.2	133.7	90.8	89.4	93.3	98.1	99.4
A0A0G2JTI7	104.3	93.4	98.6	147.5	84.9	87.2	90.2	91.2
A0A0G2JTI8	107	112.6	105.2	91.5	108.1	124.9	103.8	93
A0A0G2JTJ9	112.9	93.3	109.3	101.8	97.2	99.4	94.6	87.7
A0A0G2JTK4	94.8	94.6	90.7	106.9	89.2	94.5	106.1	107.2
A0A0G2JTL5	99.7	102.8	95.7	103.5	95.4	99.2	99.7	103.9
A0A0G2JTL6	78.6	95.1	112.2	104.6	138.4	97.6	91.1	105.3
A0A0G2JTM1	118.8	89.3	148.5	88.3	88.2	84.9	93.6	88
A0A0G2JTM9	94	103.7	145.6	104.1	97.2	87.5	89.3	86.5
A0A0G2JTN4	96.4	99.8	107.6	94.5	99.2	96.3	99.7	101.7
A0A0G2JTN8	108.9	96.9	109.7	99.1	111.1	95.4	96.1	88.3
A0A0G2JTS3	90.4	93.6	92.7	111.3	105.2	123.8	94.2	98.3
A0A0G2JTT2	109.1	93.9	102.3	102.5	101.6	96.3	100.5	99.1
A0A0G2JTT6	97.1	107.5	138.9	113.2	104.5	93.7	87.5	83.5
A0A0G2JTU1
A0A0G2JTW1
A0A0G2JTW9	83.6	146.7	79.3	94.1	78.9	105.4	98.4	142.6
A0A0G2JTX2
A0A0G2JTX7	107.1	107.8	103.7	104.3	84.6	89.7	95.9	98.5
A0A0G2JTX9	92.8	110.2	89.5	100.5	88.7	88.3	101.4	106.2
A0A0G2JTY2	63.5	81.4	121.3	144.3	80.1	87.7	92.3	98.8
A0A0G2JTY3	105.1	85.2	86.6	118.3	107.7	106.3	99.4	94.6
A0A0G2JTY4
A0A0G2JTZ2	87.1	85.7	81.5	90.9	123.3	115.3	87.5	90
A0A0G2JU05	120.2	104.9	91.4	93	92.8	96.1	94.5	98.7
A0A0G2JU07	93.6	97.5	100	98.2	98.1	97.7	110.3	100.4
A0A0G2JU11	156.9	130.6	111	112.7	87.7	107.1	86	100.7
A0A0G2JU12	87.1	99	88.2	93.2	95.8	94.2	97.3	102.6
A0A0G2JU13	99.7	108.5	85.6	118.4	86.9	80	101	108.8
A0A0G2JU15	93.8	144.4	121.1	96.1	83.1	92.4	84.2	101
A0A0G2JU45	95.7	94.8	108.4	96.9	103.7	98.5	111.8	104.8
A0A0G2JU49	103.7	127.1	102.2	99.5	78	93.9	87.9	97.2
A0A0G2JU66	116.2	89.2	92.2	96.9	99.9	94.9	98.8	98.3
A0A0G2JU71	96.8	96.8	102	91.5	102	117.6	96	109.2
A0A0G2JU73	130.2	82.8	88.9	89.3	79.4	80.2	86.8	84.4
A0A0G2JU77	109	105	95.8	99.5	91.2	94.1	96.2	101
A0A0G2JUA5	91.1	98.4	109.2	102.6	83.9	106	101.1	101.2
A0A0G2JUB0	128.6	146.9	80.8	90.1	66.8	69.9	99.3	146
A0A0G2JUC7	98	98.5	108.6	111.4	97.2	98.7	101.4	99.7
A0A0G2JUD3	89.3	86.4	80.8	78.1	137	96.4	121.3	102.2
A0A0G2JUE4	107.1	99.4	97	97.8	90	93.2	97.6	101.5
A0A0G2JUF2	105	93.1	108.2	102.7	89.2	84.6	95.7	81.5
A0A0G2JUF9
A0A0G2JUG7	110.8	95.6	101.1	103.4	86.6	85.8	93.8	94
A0A0G2JUH4	120	97.8	112.5	93.3	97.2	95	90.4	102.5
A0A0G2JUH8	102.6	105.7	139.5	104.6	106.8	96	86.4	77.7
A0A0G2JUI5
A0A0G2JUJ9	104.1	95.4	100.4	96.2	94	97.2	103.1	102.3
A0A0G2JUM2	109.2	95	103.4	102.3	88	95.4	103.5	98.2
A0A0G2JUM3	92.4	95.4	108.3	98.4	98.7	101.3	102.7	101.9
A0A0G2JUP0	96.8	99	99.7	94.7	96.6	94.9	102.7	105
A0A0G2JUR5	98.7	98.3	96	99.2	94.3	92.4	105.2	100.5
A0A0G2JUT8	117.6	74	96.2	103.4	90.4	95.9	105.7	100.5
A0A0G2JUX4	110.7	99.3	93.8	94.8	97.4	96.6	95.5	96
A0A0G2JUX5	67.8	117.6	243.5	89.9	71.6	82.7	66.2	63.9
A0A0G2JUZ0	112.8	100.5	97.5	101.9	109.3	110.2	88.6	98.2
A0A0G2JUZ5	109.9	93.4	87.1	102.5	94.3	125.1	87.3	99.8
A0A0G2JV19	122.4	75.5	105.9	70.1	62.5	63.4	60.6	80.3
A0A0G2JV28	94.5	102.2	100.6	101.4	96.5	96.2	117.3	95.6
A0A0G2JV31	105.5	102.8	96	101.3	96.8	91.8	99.2	97.5
A0A0G2JV42	117.2	85.4	85.6	88.1	98.2	72.1	117.1	111.1
A0A0G2JV46	121.2	90.4	91.5	94.5	107.2	99.4	90.8	82.7
A0A0G2JV51	127	166.1	121.5	124.8	84.9	79.7	93	97.2
A0A0G2JV54	279.4	90	76.4	135.5	66.4	56.3	70.5	74.1
A0A0G2JV65	94	94.2	105.5	101.9	105.4	100.7	101.9	95.6
A0A0G2JV79	128.7	97.5	87.9	100.1	86.3	92.5	97.9	100.6
A0A0G2JV84	126.2	114.1	91.7	94	84.7	98.4	87.8	96.6
A0A0G2JV99	77.9	104	178.8	110.5	90.9	99.1	98	88.9
A0A0G2JVA7	94.4	109.7	104.9	104.1	101	100.5	99	91.2
A0A0G2JVB6	94.9	93.9	101	99.6	96.3	94.8	104.1	99.8
A0A0G2JVC2	98.6	86.1	91.2	87.6	90.5	121.6	99.6	108
A0A0G2JVC8	119.5	110.8	89.7	86.7	84.6	82.5	104.7	101.5
A0A0G2JVD6	101.1	99.3	93.6	98.6	96.5	99.6	102.6	99
A0A0G2JVE0	101.2	80	108.5	95.2	80.2	78.1	109	87.5
A0A0G2JVE6	103.3	92	118.7	93.7	89.9	81.5	111.3	101.7
A0A0G2JVF4	95.1	103.5	89.5	94.5	77.9	83	102.5	97.9
A0A0G2JVG3	62.2	69.6	176.9	114.3	90.7	94.9	122.8	103
A0A0G2JVG4	98.1	100.3	95.8	103.6	105.1	108.6	99.3	98.3
A0A0G2JVH4	95.6	91.3	102.3	105.4	103.6	99.9	97	99.7
A0A0G2JVH5
A0A0G2JVI4
A0A0G2JVM2	104.5	95	98.2	107.4	94.2	96.1	100.9	97
A0A0G2JVM3	120	132.9	94.9	91.7	84.3	95.5	93.6	104.2
A0A0G2JVQ5	83.9	96.9	91.4	105.8	103.7	83.8	128.3	93.6
A0A0G2JVR9
A0A0G2JVS9
A0A0G2JVT8	138.8	89.8	155.9	116.8	81.9	86.6	97.4	103.3
A0A0G2JVV1	124.1	80.5	100.4	104.1	89.7	93	95.4	95.3
A0A0G2JVW3	84.5	102.5	132.4	105.9	109.8	115.1	87.9	92.2
A0A0G2JVW5	112.6	99.1	111.8	110.4	84	76.6	88.5	92.4
A0A0G2JVZ6	115.9	99.2	104	103.7	87.9	89.5	96.5	107.5
A0A0G2JVZ7	98.6	125.8	106.7	125.3	114.7	94.8	132.4	112
A0A0G2JW03	91.9	159.2	91.3	88.8	63.9	68.3	88.8	155.2
A0A0G2JW12	94.6	104.9	87.1	109.4	97.6	88.6	116	100.1
A0A0G2JW14	99.9	101.4	109.9	101.2	81.8	79.7	100.3	98.6
A0A0G2JW21	92.2	130.7	94.4	99.3	83.2	82.2	106.4	123.6
A0A0G2JW29	110.7	95.2	100.8	97.7	93.8	92.7	101.8	95
A0A0G2JW34	101	97.3	113.2	111	105.7	98.2	103.6	86
A0A0G2JW38	108	83.4	90.3	98.4	97.7	105.1	118.8	99.1
A0A0G2JW52
A0A0G2JW69	84.2	99.1	88.8	92.2	89.9	91.5	105.8	108.4
A0A0G2JW85	109.8	102.2	119.2	103.4	83	85.6	90	93.5
A0A0G2JW88	87.1	100.9	103.9	102.5	103.5	105.4	102.4	106.8
A0A0G2JW90	97.8	95.5	94.7	101	99.4	105.4	105.3	97.3
A0A0G2JW94	102	103.6	93.6	173	98	86.1	86	74.2
A0A0G2JWB6	88.2	97.4	137.3	114.2	96.7	94.7	97.4	94.6
A0A0G2JWC7	109	92.4	99.8	96.2	100.1	98.3	101.1	102.1
A0A0G2JWD6	110.3	95.6	91.3	103.1	93.6	96.5	100.7	99.6
A0A0G2JWE3
A0A0G2JWG6	110.9	94.1	106.8	94.2	89.1	87	98.5	97.1
A0A0G2JWH4	95.5	97.6	95.2	103.8	75.4	90.1	98.9	123.8
A0A0G2JWH5	97	103.9	105	95.3	92	98.4	101.8	103.1
A0A0G2JWJ0	107.5	82.9	102.7	103.6	98.2	92.5	106.2	95.3
A0A0G2JWJ5	92	106.8	99.3	124	83.2	100.6	99	113.2
A0A0G2JWK2	102.7	104.4	104.1	96.9	98.2	89.3	103	102.6
A0A0G2JWK7	72.8	95.1	157.2	84.3	97.9	108.6	96.7	100.7
A0A0G2JWL1	91	114.5	93.4	79.5	107.5	110.5	100	105.4
A0A0G2JWM2	100.4	98.1	97.2	96.4	100.3	88.5	96.1	98.8
A0A0G2JWP6
A0A0G2JWP8
A0A0G2JWQ0	99.1	125.9	99.5	94.2	84.1	93.2	109.7	115.4
A0A0G2JWQ7	115.5	96.5	95	89	87.6	95.1	112.4	108.3
A0A0G2JWR1	95.8	103	96	109.4	98.3	97.5	105.8	105.6
A0A0G2JWT6	116.9	137	96.9	111.8	78.2	89	85.1	101
A0A0G2JWV8
A0A0G2JWX1	101.2	91.7	99.1	95.9	102.9	101.9	100.3	97.4
A0A0G2JWY8
A0A0G2JX01	104.1	99.8	87	103.5	85.3	86.9	115.9	113.1
A0A0G2JX25	103.5	89.3	107.3	116.3	101.8	92.9	91.2	91.1
A0A0G2JX30	100.6	112.6	96.5	183.2	80	81.6	95	103.3
A0A0G2JX46
A0A0G2JX67	95.9	98.8	100.5	101.6	96.9	106.5	101.9	101.4
A0A0G2JX72	106.5	98.5	94.2	109.8	105.9	99.5	102.2	95.2
A0A0G2JXA1	107	87.4	95.8	101.1	96.6	96.8	91.5	93.6
A0A0G2JXC1	102.7	106.2	101.1	101.7	92.2	100.6	98.2	103.1
A0A0G2JXC2	98.2	101.8	90.5	96.6	93.8	86	127	101.1
A0A0G2JXC8	98.1	92.1	88.3	107.6	81.9	88.6	109.2	102
A0A0G2JXC9
A0A0G2JXD5	124.1	121.6	105.5	108.7	86.7	100.2	83.9	92.5
A0A0G2JXE5	105.9	96.2	101	102.9	101.8	91.7	93.4	95.9
A0A0G2JXG3	118.5	95.5	102.5	89.8	91.4	81.2	91.5	101.8
A0A0G2JXG5	101	118.8	107.9	92.4	88.8	91.4	99	97
A0A0G2JXH2	117.7	93.6	94.9	98	94.1	92.8	99.2	99
A0A0G2JXJ7	95.3	109.6	66.8	78.2	74.6	103.3	111.8	129.9
A0A0G2JXJ9	72.3	70.6	84.4	100.4	119	97.3	117.6	127.8
A0A0G2JXN6	90.1	86.3	148.1	107.3	98.4	97.7	100.3	89.8
A0A0G2JXN8	87.7	115.3	107.8	102	85.4	84.5	97.8	97.8
A0A0G2JXP1	116.2	80.9	85.5	100	109.9	104.2	101.8	93.8
A0A0G2JXT3	156	184.9	74.7	82.5	68.8	72.8	84.2	76.9
A0A0G2JXT6	71.2	146.8	219.8	84.6	80.4	78.1	86.5	79.8
A0A0G2JXT8	95.5	94.7	100.5	99.4	99.3	101.2	103.8	100.7
A0A0G2JXY3	104	92.9	106	106.8	102.9	100.7	101	108.7
A0A0G2JXZ3
A0A0G2JXZ9	95.5	92.5	88	107.2	94	94.8	105.7	98.1
A0A0G2JY07	87.4	85.9	108.3	128.9	86.3	91.6	111	96.7
A0A0G2JY08	98.8	103.6	100.8	104.6	92.1	92.4	98.2	97.3
A0A0G2JY12	87	101.1	105.4	102	110.2	94.3	96.6	98.9
A0A0G2JY18	90.9	100.4	124	98.3	84.7	90.7	89.1	94.6
A0A0G2JY19	104.6	101.6	106.5	96.5	95.9	96.3	95.9	98
A0A0G2JY22
A0A0G2JY32	168.1	119.7	115	78.4	67.7	71.8	73.9	84.8
A0A0G2JY43	97.2	107.5	92.8	99	102.4	109.1	105.6	100
A0A0G2JY73	108.4	111.4	97.3	99.5	80.3	88.1	101.4	103.6
A0A0G2JY98	74.4	113.2	129.4	80.8	76.9	79.7	116	88.7
A0A0G2JYA2	101	107.7	98.2	102.4	91.8	93.3	103.4	105.7
A0A0G2JYA4	95.8	106.8	99.5	95.2	96.2	92.7	104.5	100.8
A0A0G2JYA7
A0A0G2JYB1	97.4	96.8	103.1	101.9	98.6	99.5	105	100
A0A0G2JYE0	116.1	92.3	89.9	101.7	95.9	96.2	95.4	93.8
A0A0G2JYG5	100.8	100.9	128.2	95.5	82.8	78.5	88.4	100
A0A0G2JYI0	96.8	101.1	93	99.2	91.4	93.5	102.9	106.1
A0A0G2JYI5	111.2	89.1	88.7	108.6	107.1	110.1	104.3	118.7
A0A0G2JYK2
A0A0G2JYN4	133.9	85.3	101.9	110.3	93.1	91	91.6	87.9
A0A0G2JYP2	102.7	90.2	95.6	98.9	82	93.1	112.5	109.6
A0A0G2JYQ3	116.5	106.1	115	117.3	95.3	94.4	100.3	104.9
A0A0G2JYR1	101.5	72.7	80.1	138	92.1	81	98.7	108.2
A0A0G2JYT1	99.8	98.5	109.6	102.1	99.3	101.6	95.4	90.5
A0A0G2JYU2	107.4	119.2	91.1	94.3	95.6	86.1	100.7	94.7
A0A0G2JYV9
A0A0G2JYY3
A0A0G2JZ04	106.1	81.3	81.5	105.5	112	106.6	106.8	93.1
A0A0G2JZ34	90	96.3	103.8	110.1	102.6	95.3	99.5	96.6
A0A0G2JZ38	96	90.9	103.9	94.3	81.2	83.7	89.4	96.4
A0A0G2JZ48	109.3	98.5	90.5	104.6	86.7	84.6	100.6	102.5
A0A0G2JZ52	93.2	106.6	109.7	99.1	103.2	101.3	98.7	100.1
A0A0G2JZ53	95.8	91.6	104.4	105.5	102	97.9	99.5	97.1
A0A0G2JZ73	88.2	101.8	89.4	99.8	93.3	98.6	106.9	116.8
A0A0G2JZ75	103	85.8	92.4	114.2	76.2	80.4	94	114.2
A0A0G2JZ87	119.4	139.6	114.1	104.3	84	87.7	83.3	79.6
A0A0G2JZ88	106	92.3	92.9	115.9	117.2	113.7	101.3	88.6
A0A0G2JZ94
A0A0G2JZA2	107.8	89.7	108.7	94.1	98.9	100.4	96.5	101.3
A0A0G2JZA7	104.1	92	92.6	111.5	88.3	87.7	103.3	102.7
A0A0G2JZD1	136.3	130.8	139.6	122.2	71.8	71.5	80	87.7
A0A0G2JZE7	106.9	92.7	113.5	96.6	81.5	80	100	117.9
A0A0G2JZE8	118.1	100.8	89	96.8	82.6	79	93.2	97.3
A0A0G2JZF6	142.5	91.1	87.7	91.3	94.4	87	91.6	95.2
A0A0G2JZG7	94.4	103.6	102.6	104.3	106.4	104.3	107.3	109.9
A0A0G2JZH0	122.8	96.4	106.6	96.1	99.6	100.2	94.8	93.3
A0A0G2JZH4	106	101.5	92.6	96.7	107.2	91	119.6	111.3
A0A0G2JZH8	112	106.2	93.6	99.7	103	103.9	94.6	93.4
A0A0G2JZI0	112.6	97.7	101.5	93.8	99.7	89	92.2	93.9
A0A0G2JZI2	97.3	101.1	102.9	100.6	100.3	100.8	100.2	97.4
A0A0G2JZI5
A0A0G2JZM8	106.7	84.1	91.5	104.1	97.1	90	110.3	104.4
A0A0G2JZQ1	95.7	98.3	98.3	101.2	98.4	94.2	105.6	97.2
A0A0G2JZR1	136.7	119	72.7	94.4	62	56.9	99.7	115.2
A0A0G2JZS9
A0A0G2JZT0
A0A0G2JZT3	100	85	107.5	106.6	96.5	95.6	101.4	105.3
A0A0G2JZV7	116.5	91.4	86.4	95.9	87	73.3	105.6	108.4
A0A0G2JZV8	113.7	103.6	112.3	101.3	91.8	89.3	89.5	92.8
A0A0G2JZY3	110	76.7	77.1	121.7	68.4	69.3	75.9	76.9
A0A0G2JZZ3	101	98.3	94.1	103.4	94.2	94	98.6	100.4
A0A0G2K012
A0A0G2K014	84.9	77.1	140	105	87.1	92.5	114.9	95.8
A0A0G2K022
A0A0G2K038
A0A0G2K042
A0A0G2K047	109.8	102.6	111.1	90.9	98.1	95.7	97.7	95.9
A0A0G2K051	108	97.2	102.3	110.3	91.5	94.9	93.8	89.9
A0A0G2K089	91.4	78.1	77.9	95	106.4	92.1	117.7	89.3
A0A0G2K098	114.6	112	113.9	108.1	86.1	88.7	90.4	81.1
A0A0G2K0A0	108	96.1	111.3	107.7	79.1	78	106.3	93.2
A0A0G2K0B0	96.4	97.4	107.9	114.1	106	100.2	95.5	88.6
A0A0G2K0C8	100.4	111	124.4	103	94.1	88.6	80.8	87.3
A0A0G2K0C9
A0A0G2K0D3	106.1	73.4	95	108.7	106.7	105.2	107.8	101.8
A0A0G2K0E0
A0A0G2K0F3	85.9	96.2	108.3	95.1	110.2	89.5	95.5	108.7
A0A0G2K0G1	112.8	102.3	100.4	97.9	97.7	91.8	100.2	92.8
A0A0G2K0J4	103.5	120.8	98.7	102.1	84.2	89.1	102.1	105.2
A0A0G2K0J7
A0A0G2K0K6	85.6	100.2	153.8	144.4	74.9	89.7	80.3	83
A0A0G2K0N6	92.7	105.1	94.9	93.7	78	82.2	125.1	126.6
A0A0G2K0N7	64.2	68.7	120.1	67.3	134.3	137.8	133.4	67.2
A0A0G2K0P0
A0A0G2K0P5	102.4	83.6	107.3	108.4	101.1	108.5	107.4	104.9
A0A0G2K0Q8	107.5	105.4	110.1	105.2	86.5	91.8	85.7	103.5
A0A0G2K0T5
A0A0G2K0U8
A0A0G2K0V4	71.3	90.3	112.4	132.7	93.5	107.3	101.5	115.5
A0A0G2K0W3	96.6	96.7	93.5	94.2	81.9	90.4	98.3	104.6
A0A0G2K0W9	90.7	110.2	104	103.3	99.8	102.8	99	94.4
A0A0G2K0X1
A0A0G2K0Y9	99.8	103.9	97.4	100.1	84.5	90.4	114.8	88.6
A0A0G2K0Z3	89.5	97.9	118.4	115.8	114.6	108.8	97.7	103.5
A0A0G2K0Z9
A0A0G2K110	85.4	83.3	90.2	103.3	98.8	96.5	107.3	105.9
A0A0G2K121	107.5	90.7	97.2	101.5	99.3	102.2	102.3	103
A0A0G2K132	81.2	125.7	118.6	102.5	76.8	89.1	99.5	119.1
A0A0G2K135	83.6	90.2	87.6	104.7	103.3	93.1	113	105.3
A0A0G2K151	93.1	92.3	104.4	107.9	107.3	100.7	104	99.3
A0A0G2K160	82.7	67.8	79.6	97.9	85.3	115.3	156.9	98.4
A0A0G2K161	106.2	106.5	93.2	93.2	89	91.1	96.3	112.2
A0A0G2K167	94.5	96.8	100.6	122.8	100.5	102.5	98.5	94
A0A0G2K189	108.3	96.2	94	95.6	100.6	97.9	101.8	95.8
A0A0G2K191	107.4	95.5	97.2	95.9	101.6	97.6	103.2	98.4
A0A0G2K199
A0A0G2K1A0	95.6	97.9	100.7	104.5	97.3	98.5	97.8	97.3
A0A0G2K1A1	98.1	94.5	99.4	103.9	115.9	109.1	91.3	106.8
A0A0G2K1A9	105.8	113.5	110.3	105.1	88.6	90.1	101	109.1
A0A0G2K1B0	98.6	71.1	138.8	88.1	77.1	75.5	113.9	95.4
A0A0G2K1B6	79	125.7	136.6	96.5	105.6	94.4	86.5	93.6
A0A0G2K1C0	94.5	96.6	112.2	103.9	99.8	99.2	99.8	98.5
A0A0G2K1D2	108.8	76.1	99.9	101.4	105.2	115.3	98.6	87.7
A0A0G2K1E2	106.3	93.3	99.6	108.8	102.9	102.2	97.2	99.2
A0A0G2K1E5	108	109	129.4	97.2	89.6	85.7	87.8	93.2
A0A0G2K1E6	112.5	89.3	114	93.3	105.3	102.8	100.5	93.4
A0A0G2K1F2	148.2	182.9	85.5	78.2	74.3	72.3	88.2	85.7
A0A0G2K1G5	97.2	89.8	92.4	94.5	85.3	86.2	126	99.5
A0A0G2K1K5	96.6	96	117	101.3	99.7	103.9	95.6	98.2
A0A0G2K1L0	104.7	100.8	107.6	103.9	78.6	89	95	108.8
A0A0G2K1M2	99.1	98.8	92.1	99.9	98.4	95.2	108.1	106.3
A0A0G2K1M4
A0A0G2K1M7	76.7	101.9	122.2	104.3	100	106.8	107.1	108.4
A0A0G2K1M8	106.8	98.9	99.8	92.6	92.8	95.3	102.1	101.9
A0A0G2K1P8	125.8	93.3	99.1	93.7	80.7	76.4	106	110.7
A0A0G2K1S6	107	130.1	83.3	95.4	89.5	86.7	94	94.6
A0A0G2K1S9	109.3	137	151	92.3	78.2	120.8	81.4	83.1
A0A0G2K1U9	107.5	87.2	65.5	81.5	61.4	62.9	85	94.7
A0A0G2K1V3	93.8	102.4	105.8	103.5	100.8	102.7	109.9	104.5
A0A0G2K1W9	101.7	88.2	94.7	107.1	110.3	101.6	99.5	103.2
A0A0G2K1Y8	97.5	100.3	105	99.4	98.5	101.1	102.8	101.1
A0A0G2K1Z2	92.9	103.5	92.3	142.8	84	73	93.7	91.6
A0A0G2K1Z5	140.3	77.3	88.8	104.9	107.6	100.9	84.6	95.5
A0A0G2K1Z9	90.2	93.8	98.6	112.1	95.3	93.5	104.5	113.3
A0A0G2K213
A0A0G2K214
A0A0G2K219	105	90.2	117.3	95.2	95.5	101.2	100.2	94.9
A0A0G2K238	85.5	108.6	94.2	101.5	125.5	79.3	121.2	83.6
A0A0G2K248	105.1	103.7	95.2	103.4	99.4	99.7	95.1	100.2
A0A0G2K261	96.9	92	97.6	103.1	103.8	96.2	99.1	105.2
A0A0G2K263	127	119.9	90.9	93.1	79.6	84.8	95.8	104.8
A0A0G2K273	101.2	98.9	107.4	101.9	90.1	92.6	102.5	102.6
A0A0G2K290	82.5	105.9	84.2	86.7	79.4	79.3	112.3	127.8
A0A0G2K2B0
A0A0G2K2B3	103.8	101.4	106.6	94.8	93.9	89	96.6	93.1
A0A0G2K2B4	93.1	97.9	108.4	109.1	104.1	97.8	105.3	92.6
A0A0G2K2B5	92.9	112.5	109.5	94.6	95.1	97.4	98.9	101.9
A0A0G2K2B6	110.2	109.9	119.1	89.2	96.7	99.7	95.2	92.4
A0A0G2K2B7
A0A0G2K2B8	99.5	80.7	91.2	100.5	95	96.9	105.4	95.7
A0A0G2K2C7	107.7	95.8	94.8	102.6	90.7	95.6	97.9	99.1
A0A0G2K2D4	143.2	90.5	101.3	149.1	83	74.6	83.1	101.6
A0A0G2K2D6	103.3	110.9	92.3	99.7	87.8	87.3	102.9	108.5
A0A0G2K2F4	96.7	115.2	80.5	80.2	89.5	72.7	106.9	178.6
A0A0G2K2H4	88.4	89.8	84.7	100.5	102.7	89.2	112.5	102.1
A0A0G2K2I0
A0A0G2K2J9	101.1	100.7	98.7	96.4	93.4	97.8	98.3	97
A0A0G2K2L8	102.4	87.2	97	102	101	97.6	105.4	94.7
A0A0G2K2M2
A0A0G2K2M9	106.2	99.9	100.8	99.8	94.8	93.8	96.5	98.8
A0A0G2K2P3
A0A0G2K2P4	97.2	100.3	95.9	106.6	92.2	98.4	106.1	113.1
A0A0G2K2P5	105.1	93.3	102.1	95.7	102.7	95.3	104.3	101.7
A0A0G2K2P6	109	91.6	80.8	105.2	81.8	81.9	107.4	105.8
A0A0G2K2Q1	88.9	101.6	85.5	101.5	92.2	87.3	111.7	108.8
A0A0G2K2Q2	118	98.9	87.9	89.7	101.7	101.3	102.2	100.2
A0A0G2K2R5	107.2	104.7	123.3	102.7	78.6	80.2	112.1	94.2
A0A0G2K2U0	107.7	114	117.3	105.9	90.1	93.9	100.9	109.5
A0A0G2K2U7	94.8	114	95.9	116.2	85.1	97.2	97.7	95.7
A0A0G2K2V5	95.3	88.2	98.1	98	96.8	100.4	112.6	109.1
A0A0G2K2V6	91.3	89.6	97.1	110.5	142.7	79.9	107.1	84.2
A0A0G2K2W2	105.1	98.9	104	88.6	112.5	97.1	102.8	95
A0A0G2K2W5	83.7	131.1	113.6	88.9	77.3	79.1	96.2	112.6
A0A0G2K2Z0	101.7	110.7	107.8	98.6	97	98.2	93.3	91.4
A0A0G2K305
A0A0G2K309	104	102.3	94.6	100.5	100.6	100	100.3	104.2
A0A0G2K318
A0A0G2K320	106.5	91.6	100.1	109	85.8	79.5	96.9	106.3
A0A0G2K332
A0A0G2K337	92.4	93.3	93.5	84.6	77	77.8	122.3	90.3
A0A0G2K350	98.1	91.9	96	100.4	106.1	99.9	101.8	97
A0A0G2K366
A0A0G2K376	109.2	89.7	90.1	89.4	84.8	82.4	96.9	87.5
A0A0G2K383	79.6	155.1	152.1	104.7	79	81	83.6	86.4
A0A0G2K394	94.5	112.6	103.7	99	108.6	109.1	97.2	97.4
A0A0G2K3A0	91.3	82.6	88.1	91.5	103.5	92.7	104.6	89.6
A0A0G2K3B0	116	87.2	109.7	112.2	85.8	83.6	86.5	98.8
A0A0G2K3B2	114.2	113.7	96.9	104.5	92.5	92.4	98.4	97.9
A0A0G2K3C5	132.5	108.1	76.6	88.8	101.7	83.7	101.7	91.6
A0A0G2K3G0	72.4	102	102.5	90.4	119.2	88.8	116.5	112.2
A0A0G2K3H2	125	91.4	109.3	85.5	76.2	76.3	91.5	89.9
A0A0G2K3H5	93	95.2	99.6	94.3	88.9	92.8	112.5	116.2
A0A0G2K3H7	94.8	104.1	93	97.2	93.3	106.1	99.9	113.4
A0A0G2K3I9	113.9	100.4	94.2	97.6	85.6	97.7	105.7	98.4
A0A0G2K3K2	95.4	100.5	110.4	104.1	92.2	94.9	99.5	100.2
A0A0G2K3L8	101.7	94.9	106.6	109.5	89	91.7	99.5	99.7
A0A0G2K3S3	134.9	68.4	94.3	93.9	86.9	107.3	114.2	95.5
A0A0G2K3S6	127.3	116.9	115	107.6	83.2	107.4	96.4	110.7
A0A0G2K3V4	127	135.8	98.4	99	77.9	78.9	88.5	94.2
A0A0G2K3V9	94.3	100.9	102.1	109.8	107.6	100.9	92.6	97.4
A0A0G2K3W1	108.3	100.7	101	101.7	96.3	94.6	92.9	101
A0A0G2K3Y6
A0A0G2K3Z9	96	93.9	101.3	98.4	105.7	102	97.5	97.6
A0A0G2K401	104.9	98	94.2	101.6	101.8	96.7	96.4	102.1
A0A0G2K402	97.4	96.1	109.9	106	99.1	98	92	97.3
A0A0G2K405	107.1	108.4	97.1	106.4	94.5	95.4	98.9	100.5
A0A0G2K427	113.2	102.4	92.9	100.9	90.7	91.2	96.7	105.3
A0A0G2K435	102.4	105.1	103.9	101.4	94.1	92	97.5	97.1
A0A0G2K437	115.8	104.1	81.4	96	85.2	85.8	103.3	102.7
A0A0G2K459	149.7	90.9	82.7	91.5	89	95.4	89.7	88.2
A0A0G2K463	112.8	90.9	87.5	91.2	85.2	86.5	100.8	98.5
A0A0G2K464
A0A0G2K477	92.1	97	86	100.9	95	83.2	127.2	107.4
A0A0G2K478	83.3	106.7	109.8	106.4	103.3	102.9	96.7	110.4
A0A0G2K4C8	95.5	205.6	90.8	95.6	72.8	87.4	107	126.1
A0A0G2K4D9	102.4	104.3	108.9	97.6	92.4	96.2	102.5	96.9
A0A0G2K4F6	93.7	87.6	105.3	115.2	93.1	84.9	101.3	100.7
A0A0G2K4G3	97	112.3	84.6	92.1	89.3	107.8	121	114.4
A0A0G2K4H3	98.6	89.5	110.2	100.2	102.2	97.7	104.2	96
A0A0G2K4I9	100.4	97.4	142.2	97.4	86.6	75.9	90.9	93.1
A0A0G2K4K7
A0A0G2K4L3	100.4	90.3	97.1	117.2	97.4	89.3	106.2	110.4
A0A0G2K4L8
A0A0G2K4M3	92.8	127.7	130.9	122.4	137	137.1	141.6	110.6
A0A0G2K4M8	81.3	114.3	130.2	104	92.3	83	92	96.1
A0A0G2K4P8	133.9	92.9	128	104	94.9	72.7	85.3	69.7
A0A0G2K4R1
A0A0G2K4R7	90.2	100.3	128.2	106.9	93.7	90.1	96.5	92.1
A0A0G2K4T3	87.4	84.6	99.4	92.3	107.8	108.8	88.5	129.1
A0A0G2K4T7	107.9	104.5	95.4	95.8	91.4	90.9	92.5	102.6
A0A0G2K4T8	101.4	101.4	96.2	101.8	103.4	104.2	101.3	106.9
A0A0G2K4U6	104.5	98	105.3	106.2	100.5	95.2	99.7	101.7
A0A0G2K4X5	102.7	84.1	94.4	161.7	95.5	91.6	94.8	93.1
A0A0G2K4X8	128.2	99.4	95	100.7	84.7	83.5	92.5	97.7
A0A0G2K502	89.9	96.1	119.9	104.4	98.3	90.9	106.8	98.8
A0A0G2K528
A0A0G2K548	102.3	102.1	99.3	109.4	94.8	92.9	101.8	99.1
A0A0G2K549	103.2	104.2	100.2	94.5	95.5	96.2	100.1	96.6
A0A0G2K571	108.3	92.6	102.3	96.6	92.3	100	103.9	97.8
A0A0G2K583	98.5	93	95.8	96.8	106.2	105.8	106.8	90.6
A0A0G2K586	77.9	77.1	147.9	98.6	71.2	122.4	109.7	98.3
A0A0G2K595	99.7	100.6	101	98.5	88	96.7	105.4	98
A0A0G2K5A0	106.9	87.5	95.6	96.2	91.2	92.5	100.7	104
A0A0G2K5B0	106.4	100.8	100.1	99.6	95.6	100.7	100.6	95.2
A0A0G2K5C5	95	95.6	99.3	100.5	109.6	105.9	99.1	100
A0A0G2K5C8	110.2	105.5	101.7	96	96.5	86.8	99.3	99.7
A0A0G2K5D7
A0A0G2K5E4	105.7	98.4	95.7	103.3	103.8	102.3	93.6	95.2
A0A0G2K5F1	112.5	106.3	98.1	97.3	102.8	104.6	95.8	102.9
A0A0G2K5G6	98.9	101.6	93.4	106.2	88.7	93.6	99.4	113.8
A0A0G2K5J0	112	161.8	75.6	108.8	79.2	75.6	80.1	95.2
A0A0G2K5K1
A0A0G2K5K7	106.4	98.5	101.4	102.9	95.3	94.4	103.2	103.6
A0A0G2K5L1
A0A0G2K5L2	108.7	87.4	103	91.4	97.9	102	101	97.8
A0A0G2K5N1	94.1	90.5	113.9	92.7	104.4	103.5	105.5	94.5
A0A0G2K5N6	101	86.5	104.9	96.1	94.7	108.2	103.9	96.3
A0A0G2K5Q2	92.4	94	96.2	105.4	83.6	86.7	106.5	96.2
A0A0G2K5Q8	107.8	94.9	90.9	103.3	80.4	83.8	112.7	112.9
A0A0G2K5V8	98.2	89.7	138.2	93.6	67.7	72.8	88.2	95.3
A0A0G2K5W6	112.9	99.1	107.4	114.4	91.7	88.9	91.6	92.2
A0A0G2K5Y1	109	97.2	103.8	105.6	95.7	89.8	110.8	94
A0A0G2K5Y3	168.8	119.3	57.6	104.8	58.5	41	109.1	121.3
A0A0G2K5Z9	121.3	133.4	94.8	129.3	100.4	120.5	112.8	89.1
A0A0G2K613	89.3	109.9	113.1	102.8	100.9	97.1	108.6	107.8
A0A0G2K617	104.2	94.6	89.8	139.1	87.8	87.5	92.3	95
A0A0G2K639	92	95.5	95.3	105.8	102.6	104	108.1	99
A0A0G2K654	69.5	100.2	122.5	105.1	92.5	113.8	98.6	113.9
A0A0G2K663	106.8	112.1	99.1	90.3	81.6	93.9	99	106.3
A0A0G2K670
A0A0G2K681	111	97.3	107.5	92.9	95.5	92.4	98.3	97.6
A0A0G2K695	98.5	85.8	117.9	103.4	80.3	83.3	103.5	122.7
A0A0G2K6A9	102.2	102.7	102.9	100.6	102.6	101.9	97.8	96.6
A0A0G2K6C7	78.8	83.3	93.9	87.4	83.2	76.9	225	68
A0A0G2K6D2
A0A0G2K6D5	97.5	88.1	98.9	97.1	106.3	97.9	99.6	99.2
A0A0G2K6E3	102.9	94.5	115.4	127.6	85	86.4	100.3	89.3
A0A0G2K6E7	105.2	85.8	83.8	94	89.1	93.6	102.1	118.7
A0A0G2K6E8	106.6	99.3	98.3	92.7	89.4	92.7	111.2	105.2
A0A0G2K6F9
A0A0G2K6G2	97.9	103.7	94.6	101.1	96.8	103	103.4	100.9
A0A0G2K6J6
A0A0G2K6M8
A0A0G2K6N8	106.3	113.6	113.5	100.8	104.5	102.9	96.2	101.2
A0A0G2K6R8	103	88.6	118.2	107.7	100.8	89.7	95.7	83.4
A0A0G2K6S7	98.3	111.9	115.8	101.2	90.2	95.6	96.1	94.1
A0A0G2K6T9	107.7	81	80.4	95.4	91.5	85.5	104.8	103.7
A0A0G2K6U1	107.5	94.5	99.2	97.7	95.6	95.8	99.4	97.1
A0A0G2K6W2	157.2	127.4	75.7	99.2	57.8	62.1	92.1	111.5
A0A0G2K6W6	120.9	95.8	102.5	90.9	92	89.2	93	94.5
A0A0G2K6X6	86	101.5	104.6	101.3	87.8	90.7	140.9	104.7
A0A0G2K6X9	100.7	98.6	98.7	92.7	102.9	105.1	97.1	101.7
A0A0G2K6Z6
A0A0G2K6Z8	101.6	115.5	119.3	93	95.5	98.5	92.6	89.7
A0A0G2K700	89.4	95.5	101.7	105.1	103	93.3	98.8	103
A0A0G2K712
A0A0G2K713	113.5	109.5	93.9	92	118.1	98.6	87.2	85.8
A0A0G2K714	77.8	99.9	107.7	100.5	98.7	100.3	103	108.4
A0A0G2K717	108.2	85.9	96.7	98.8	94.6	88.7	95.7	89
A0A0G2K719	102.2	101.1	100.8	102.9	97.8	93.6	98.7	99.5
A0A0G2K724	89.9	104.9	91.9	97.9	95.7	104.2	101.9	117.1
A0A0G2K730	106.4	97.4	94.5	95.2	100.6	91.3	100.9	105.3
A0A0G2K735	111.6	103.7	109	95.1	84.6	79.5	101.9	91.9
A0A0G2K737	107.5	93.9	96.5	94.7	90.8	96.5	97.5	90.5
A0A0G2K751	106	88.2	101.3	100.9	101.2	101.1	97.7	87.4
A0A0G2K756	110	111.6	93.5	91.7	89.6	83.6	101.4	103.4
A0A0G2K761	97	108.4	96.5	103.4	95	100.1	88.7	103.3
A0A0G2K777	104.6	99.2	95.7	100.6	99.3	92.4	104.9	100.9
A0A0G2K781	98.3	102.1	101.5	103.7	97.1	96.7	111.3	103.4
A0A0G2K785	103	94.3	95	97.8	101.5	103.2	103	98.9
A0A0G2K7B3	95.8	98.6	115.4	102.4	108.8	106	96.6	94.6
A0A0G2K7B6	111.3	99.7	98.4	102.3	90.3	95	98.4	96.5
A0A0G2K7C4	93.7	100.2	108.2	109.4	85.1	101.2	99.4	70.6
A0A0G2K7G2	84.6	79.3	89.6	95.2	97.8	100.6	84.2	99.1
A0A0G2K7G7	102.2	91.9	123.9	112.8	97.2	95.6	99.4	91.5
A0A0G2K7I4	82.5	89.8	131.7	112.5	97.3	92.2	111.8	96
A0A0G2K7K0
A0A0G2K7L0	98.3	120.6	99.3	103.9	97.5	96.1	107.3	106.4
A0A0G2K7M1	112	95.4	94.8	105.9	108.4	126.2	102.2	87.7
A0A0G2K7M2	89.2	95.2	79.6	89.7	75	78.1	101.5	116.1
A0A0G2K7N1	101.8	73.4	80.7	116.4	192.9	71.2	123.1	100.6
A0A0G2K7N7	91.6	119.3	82	103.9	86.4	85.1	114	134.6
A0A0G2K7N9	108.7	105.7	96	88.4	84.4	86.1	115.5	109.5
A0A0G2K7Q6	97.7	87.5	111.4	102.2	94.5	94.6	111.2	107.7
A0A0G2K7S2
A0A0G2K7S6	98.7	93.7	101.5	97.5	101.8	95.3	109.4	97.1
A0A0G2K7T2	99	113.6	91.8	99.8	108.2	85.9	101.5	99.1
A0A0G2K7T6	88.4	111.8	100.1	93.4	97.4	99.3	99.8	105.8
A0A0G2K7W2
A0A0G2K7W5	94	98.7	85.2	100.6	95.1	93.1	118.9	114.3
A0A0G2K7W6	94.2	95.8	97.6	94.5	94.2	97.7	111.9	108.7
A0A0G2K7X2
A0A0G2K7X3	94.2	131.5	158.7	86.5	136.3	113.6	83.8	69.8
A0A0G2K7X7	93.6	107	181.3	87	78.8	83.6	93.9	93.1
A0A0G2K7Y0	87.4	107.2	101.1	96.1	97.6	99.2	101.8	106.9
A0A0G2K808
A0A0G2K831
A0A0G2K849	106.3	112.1	91.8	100.8	94.2	92.1	92.2	97
A0A0G2K865	92.9	99.3	105.3	95.8	98.6	106.3	113.5	96.5
A0A0G2K889
A0A0G2K896	106.1	94.6	98.5	98	99	96	100.1	99.9
A0A0G2K8A6
A0A0G2K8A9	112.7	127.6	89.6	125.1	95.1	93.5	93.9	99.4
A0A0G2K8C7	113.9	134.2	107.9	97.1	79	81.1	88.5	91
A0A0G2K8D1	98.1	94.4	95.5	97.4	95	90.4	108	106.5
A0A0G2K8D6	104	86.5	103.6	98.9	105.6	107.7	96.4	96.2
A0A0G2K8E5
A0A0G2K8E7	102.2	97.6	90.7	107.3	94.9	89.5	105.6	115
A0A0G2K8H0	94.7	103	103.6	103.1	102	99.1	100.6	94.4
A0A0G2K8H6	115.9	97.2	116.3	91.9	94.8	91.2	99.7	119
A0A0G2K8I0
A0A0G2K8K3	95.9	113.8	103.9	91.1	84.1	91.6	97	105
A0A0G2K8K5
A0A0G2K8L9	124.9	94.1	79.1	89.5	99.2	74.9	100.6	87.6
A0A0G2K8N6	96.5	87.3	91.2	91.6	89.3	88.3	134.5	98
A0A0G2K8N9	99.5	99.2	96.6	95	95	94.8	97.7	94.4
A0A0G2K8P3	109.5	92.8	95.9	95	103.1	99.6	96.8	99.6
A0A0G2K8Q1	102.3	108.9	91.6	98.3	81.9	95.4	105.4	107.8
A0A0G2K8R3	106.9	88.4	97.1	96.1	95.4	93.8	108.2	108.9
A0A0G2K8S6	111.1	107.9	99.1	96.5	96.3	90.1	92.2	104
A0A0G2K8T0	99.4	102.6	123.2	112.8	80.4	84.9	96	107.6
A0A0G2K8V2	97.9	98.1	103.7	97.7	95.5	98.2	101	98.4
A0A0G2K8V3	105.5	88.3	97.4	98.8	91.7	83.9	102.1	93.4
A0A0G2K8V5	91.9	105.9	86	97.2	93.4	97.6	105.6	113.3
A0A0G2K8W9	95.9	96.4	103.5	99.6	98.4	102.4	103.4	100.5
A0A0G2K8X3	98.4	112.8	91.5	100.7	99	91.3	91	107.8
A0A0G2K8Z9	105	100	98.5	98.5	94	95.1	99.2	98.4
A0A0G2K904	114.8	105.5	125.6	97.6	92	90.6	92.1	89.7
A0A0G2K916	96.6	104.6	123.5	96.8	94	94.1	94.3	88.3
A0A0G2K929	120.1	84.2	95.7	117.3	95.7	91.1	110	107.8
A0A0G2K931	81.9	92.9	94.8	97.1	93.9	96.7	97.3	120.4
A0A0G2K933	127.8	76.9	103.7	105.2	104.5	98.7	95.4	93.2
A0A0G2K948	107.6	117.7	97.5	104	85.5	83.3	97.5	105.5
A0A0G2K950	120.9	113.8	96	88.1	95.2	87.4	98.8	98.5
A0A0G2K964
A0A0G2K977	102.7	96.4	105.8	100.1	101.1	93.9	103.1	97.6
A0A0G2K9A2	98.2	102.9	107	102	97.5	94.4	98.5	100
A0A0G2K9B1	92.9	106	104.8	108.2	97.7	95.4	104.5	101.1
A0A0G2K9B4	107.8	94.6	105.5	103.3	106.3	97.9	101.8	97.2
A0A0G2K9C8
A0A0G2K9D6	109.1	79.1	107	91.9	79.4	79.5	96.9	102.3
A0A0G2K9D8	174.7	92.3	84.6	86.3	69.3	65.5	71.2	77.9
A0A0G2K9E0	98.6	99.8	97.8	101.6	93	91.3	103.1	103.3
A0A0G2K9E1	102.7	107.9	106.9	92.9	90.8	94.9	99.8	96.9
A0A0G2K9E5	97.7	85.1	102.7	114	103.8	97.5	99.7	103.1
A0A0G2K9F2	94.5	105.9	88.8	100.4	88.6	93.7	109.5	119.7
A0A0G2K9F9	99.4	85.7	101.7	100.2	102.2	97.6	104.8	98.6
A0A0G2K9G3	113.1	127.8	94.9	91.5	95.2	102.2	93.6	98.2
A0A0G2K9H8	90.2	100.8	100.4	99.9	90.8	95.1	120.5	106.7
A0A0G2K9I6	84.8	93.5	96.4	113.2	97.5	93.6	120.5	97.5
A0A0G2K9J1	98.1	108.2	111.8	99.2	98.3	97.9	94.3	96.5
A0A0G2K9J2	100.8	85.1	107.9	119.1	94.9	101.2	95.9	87.6
A0A0G2K9K2	93.3	113.6	102.3	96	87.4	93.8	98.9	109.2
A0A0G2K9L2	105.4	113.7	105.2	101.4	92	96.3	91.6	96.4
A0A0G2K9L6	107.4	98.7	103.7	108	102.8	92.1	101.7	95
A0A0G2K9M5	106.5	84.5	93.2	99.6	89.8	85.8	95.5	104.5
A0A0G2K9N3
A0A0G2K9P5	102.7	92.1	110.6	91.7	97.1	90.9	104.6	96.1
A0A0G2K9Q0
A0A0G2K9Q1	84.5	102.9	93.3	195.4	76	84	78.4	87.7
A0A0G2K9Q3	95.6	88.3	101.8	111.8	96.8	93.1	102.4	100.2
A0A0G2K9Q8	91.8	88.4	102.8	101.1	105.6	102.3	93	93.6
A0A0G2K9R0	105.3	95	108.1	111.8	108.1	98.5	89.7	83.2
A0A0G2K9T1	104.4	102.4	99.4	97.5	94.3	95.5	99.7	93.5
A0A0G2K9T4	108.7	94.8	96.5	110.8	93.5	90.2	97.3	98.7
A0A0G2K9U6	97.7	102.1	96.2	94.5	91.1	87.8	96.3	99.1
A0A0G2K9V6	93.9	101.7	99	103.3	100.4	95.7	105.3	101.3
A0A0G2K9Y7	47.9	85.7	66	92.5	108.3	141	80	124.6
A0A0G2K9Y9	96.8	100.6	123.2	96	99	100.8	93.3	96.6
A0A0G2KA14
A0A0G2KA25	100.6	98.6	95.8	95	91.5	98.2	101.9	102.5
A0A0G2KA27
A0A0G2KA50	115.6	124.8	120.9	99.8	93.9	111.3	120.9	112.6
A0A0G2KA69	82.5	87	93.2	108.5	117.6	115.7	96	85.8
A0A0G2KA71	86	104.6	109	103.4	103.6	97.3	92.5	104
A0A0G2KA79	149.4	124.9	122.8	125.9	78.4	83.2	97.4	74.9
A0A0G2KA82
A0A0G2KA91	99.1	99.6	126.4	96.9	86	75.9	86.7	96.5
A0A0G2KAA3	160	103.2	71.3	89.5	79	73.9	93.6	98.5
A0A0G2KAB3	84.6	78	73.2	89.2	84.6	79.1	108.2	123.8
A0A0G2KAE1
A0A0G2KAE2
A0A0G2KAE6	111.5	95	91.8	88.1	93.5	87.6	93.9	94.9
A0A0G2KAI2
A0A0G2KAI8	106	93.6	97.7	109.7	105.4	95.3	97.4	99.7
A0A0G2KAM3	110	104.3	89.9	102.2	109.7	108.3	94.6	90.1
A0A0G2KAN1	83.6	98.1	145.9	108.4	82.4	105.7	90.1	94.2
A0A0G2KAN5	91.2	95.6	103.8	105	103.2	96.2	92.5	97.5
A0A0G2KAP1	93.3	101.2	103.5	105.1	114.1	102.1	108.7	100.9
A0A0G2KAT3	100.8	85.8	106.9	102.6	109	103.5	93.8	87
A0A0G2KAV5	97.1	96.9	107.8	85.8	114.5	96.3	104.4	85
A0A0G2KAW5	98.3	101.7	113	110.7	106.4	96.9	99.2	103
A0A0G2KAX0	126.4	104.7	96.2	83	83.7	84.8	102.6	95.7
A0A0G2KAZ7	107.3	89	103.1	114	106.7	101.9	93.4	89.7
A0A0G2KB11	107.1	97.2	94	109.5	103.7	104.3	99.4	93.4
A0A0G2KB15	70.6	99.3	89.4	122.1	114.5	89	90.1	97.9
A0A0G2KB31	95.3	106.8	104.1	102	93.3	98.1	103	102
A0A0G2KB56	99.3	104.2	102	103.5	95.5	97.8	101.8	101.9
A0A0G2KB65	90	102.7	109.9	105	101.6	104.7	89.8	93
A0A0G2KB98	125	119.9	95.7	100.6	89.9	85.7	96.6	103
A0A0G2KBB8	88	53.9	100.4	107	169.3	105.4	115.2	62.9
A0A0G2KBC7
A0A0G2QC01
A0A0G2QC02	111.9	87.8	79.7	92.1	80.2	77.8	111.9	110.4
A0A0G2QC04	111.8	111.6	102.1	93.6	88.4	95	104	94.3
A0A0G2QC06	86	91.4	95.9	100.6	100.6	101.9	114	108.2
A0A0G2QC15	92.8	90.4	94.9	107.7	111	98.9	103.7	97.4
A0A0G2QC17	352.1	70.9	71.6	59.9	55.1	65.9	74.4	100.1
A0A0G2QC19	108.2	111.6	106.8	115.3	90.5	89.9	93.1	107.8
A0A0G2QC21	98.8	96.2	102.9	98.2	94.9	90.5	98.4	92.8
A0A0G2QC22	94.6	61.8	81.3	254.2	59.5	57.9	59.6	68.4
A0A0G2QC27	87	93.9	94.7	98.2	96.8	103.2	96	102.4
A0A0G2QC33	105.2	91	99.6	113.1	96.4	93.3	103.9	94.5
A0A0G2QC38	93.9	105.6	115.6	120.9	118.9	120.7	116.6	106.2
A0A0G2QC39	107.7	98	97.9	105.3	90.4	90.3	101.4	101.6
A0A0G2QC52	111.7	93.9	82.6	109.5	83.4	74.9	112.3	118.7
A0A0G2QC59	160.2	122.7	114.8	75.7	67.9	68.6	70.6	73.1
A0A0H2UH94	105.2	101.2	99.1	101.8	95.7	95.5	98	96.4
A0A0H2UH97
A0A0H2UHA3
A0A0H2UHB1
A0A0H2UHB7	126.9	100.7	103.9	93.4	85.8	87.1	103.4	92.7
A0A0H2UHE1	99.6	111.6	104.4	103	91.1	99.1	93.9	100.5
A0A0H2UHE5	105.7	105.8	101.3	92.1	97.3	95.4	102.3	101.5
A0A0H2UHF3
A0A0H2UHF6
A0A0H2UHF8	85.3	83.1	82	118.8	81	82.4	147.1	83.7
A0A0H2UHG0	96.4	94.7	102.5	100.3	104.7	99.5	99.6	105.5
A0A0H2UHG3	124.3	95.6	95.3	97.2	76.6	79.3	96.4	97.4
A0A0H2UHG4	138.2	100.9	92	92.1	87.4	84	94.4	88.4
A0A0H2UHH2	100.4	91	84.6	88.5	116.5	108.7	120.5	99.1
A0A0H2UHI2	102.2	93.6	100.4	99.6	98.2	95.9	101.4	97.4
A0A0H2UHI7	118	93.9	97.2	97.7	85.8	91.7	88.7	94.4
A0A0H2UHJ1	82.5	104.3	104.8	96.1	112.4	87.1	116.3	89.9
A0A0H2UHJ5	110.4	103.4	89.3	104.4	88.8	100.6	100	114.5
A0A0H2UHK0	93.2	98.5	94.3	112.3	92.4	96.7	93.7	95.7
A0A0H2UHK3	129.3	92.6	92.6	93.8	78.1	116.9	93.3	88.9
A0A0H2UHM5	90.6	94.2	105.3	98.4	126.5	96.1	98.8	97.7
A0A0H2UHN2
A0A0H2UHN7	107.3	107.9	102.7	98	98.9	93	94.9	105.1
A0A0H2UHP0	91.5	111.4	133.4	91.2	93.9	101.4	107.2	110.6
A0A0H2UHP1	70.1	75.7	112.9	101.5	136.9	110.5	109.5	99.5
A0A0H2UHP7	87.9	111.2	107.2	101.8	110.8	99.4	93.5	102.6
A0A0H2UHP9	113.7	113.3	93.6	97.2	88.7	89.7	103.3	99.3
A0A0H2UHQ0	95.1	90.9	114.9	107.8	95.8	91.2	101.2	96.6
A0A0H2UHR6	95.1	124.2	99	101.8	88.7	95.6	90.6	111.1
A0A0H2UHS5
A0A0H2UHS7	98.7	93.7	103.8	108.4	89.4	96.6	105.4	109.4
A0A0H2UHT3	90.9	82.9	86	103.9	105	101.6	124.3	88.3
A0A0H2UHT5	90.9	116.8	108.5	92.9	88.9	91.2	104	116.5
A0A0H2UHU1	95	86	101.2	106.6	95.6	96.2	103	92.5
A0A0H2UHV9	99.3	104.2	103.1	100	92.1	93.9	100.8	106
A0A0H2UHW2
A0A0H2UHX3	95.3	100.5	105.3	100.9	98.9	97.8	101.3	101.5
A0A0H2UHY8	106.7	101.6	79.8	95.1	101.7	94	99.8	88.9
A0A0H2UHZ0	94.6	108.7	111.7	114.7	85.8	92.8	111.2	85.4
A0A0H2UHZ2	101.9	93.5	99	98.8	99.1	97.3	101	99.3
A0A0H2UHZ4
A0A0H2UI05	139.1	79	88.2	105.5	121.1	117	102.6	95.4
A0A0H2UI10	117.9	107.7	100.7	98.7	80.6	80.5	94.4	95.9
A0A0H2UI14	91.2	100.6	99.1	101.4	91.1	106.8	111.3	122.8
A0A0H2UI19	96	105.4	93.4	99.2	82.9	94.4	104.6	117.8
A0A0H2UI21	115.9	99	106.5	104.5	90.6	90.4	84.7	94.8
A0A0H2UI22	99.9	113	125.5	118.5	106.2	98.8	99.8	77.5
A0A0H2UI24	87.8	77.7	76.2	111.7	73.1	66.2	89.1	107.4
A0A0H2UI26	110.7	124.6	95.2	93.7	90.1	99.7	93.2	97.9
A0A0H2UI35
A0A0H2UI38	99.6	101.6	103.2	104.7	98.7	97.5	95.8	95.8
A0A0H2UI42	101.9	92.6	90.7	92.9	87.5	89.1	89.8	95.8
A0A0U1RRP3
A0A0U1RRQ3	109	112.3	97.1	107.8	105	92.7	101.1	94.7
A0A0U1RRU5
A0A0U1RRV5	101.5	99.6	97.3	109.5	93.4	95.3	98.4	102.1
A0A0U1RRZ2	109.6	89.3	105.7	102.5	98.8	98.6	102.4	98.1
A0A0U1RRZ5	108.9	93.8	99.1	102.1	102	91.3	104.1	95.5
A0A0U1RS25	102.8	98.5	100.9	102.5	97.2	97.7	101.8	101.3
A0A0U1RVI2
A0A140TA89	82	80.7	102.8	104.4	99.7	96.5	101.2	91.7
A0A140TA98	94.2	104.2	125.7	88.7	98.1	95.9	86.7	91.3
A0A140TAA0	102.3	108.3	84.3	99.4	78.8	85.6	98	114.7
A0A140TAA4	99.5	94.9	99	99.6	103.9	103.3	101.1	94.7
A0A140TAA5	106.6	88.5	94.5	105.3	119.8	101.9	93.4	92.7
A0A140TAC3	106.7	98.4	95.3	95.5	97	93.1	103.9	103.6
A0A140TAC7	74.3	79.7	90.1	89.1	83.9	259.4	87.8	85.6
A0A140TAD1	112.1	85.4	86.1	97.9	95.2	94.3	89.9	96.6
A0A140TAE0	94.5	101	110.7	114.4	88.9	91.3	98.3	104.2
A0A140TAE2	110.2	110.2	110.5	94.7	93.9	89.5	95.5	96.7
A0A140TAE6	85.7	89.1	98.1	105.5	112.8	112.5	103.9	111.5
A0A140TAF0
A0A140TAF7
A0A140TAG3	107.9	115.4	80.4	88.7	80.3	79.6	87.7	94.6
A0A140TAH1	114.4	101.9	101.4	96.2	94	91.7	94	105.6
A0A140TAH3	103.4	104.5	108.9	109.1	99.2	90.6	94.6	100
A0A140TAI1	112	114.6	100.5	98.5	96	99.6	94.7	96.1
A0A140TAI2	111.5	103.1	98.2	94.3	103.3	95	99.4	99.7
A0A140TAJ3	104.6	97	105.5	104.7	96.6	95.3	95.9	97.5
A0A140UHW6	93.5	97.9	97.3	91.1	103.3	98.8	105	91
A0A140UHW8	103.9	94	97	88.3	102.6	100.6	101.7	100.8
A0A140UHX0	82.5	93.4	110.8	92.1	107.3	93.1	112.9	95.5
A0A140UHX6	89.5	119.3	97.8	97.5	80.9	100.5	100.4	127.4
A0A140UHX9	96.1	96.3	102.1	97.8	107.1	108.5	101.4	93.1
A0A140UHY3	95.6	112	114.7	106.2	98.9	92.5	102.1	92.2
A0A1B0GWQ7	105.5	102.9	114.9	89	89.5	83.5	92.8	98.6
A0A1B0GWS0	115.4	96.2	101.4	102.6	94.9	93.2	101.4	101.6
A0A1B0GWY3
A0A1K0GGD5	103.8	107.8	82.8	93.1	81.7	94.5	106.4	121.6
A0A1W2Q5Z6
A0A1W2Q627	98.6	101.3	99.5	94.7	108.7	100.7	95.5	103.3
A0A1W2Q655
A0A1W2Q693	94.1	100.7	94.1	97.3	95	96.8	100.7	100
A0A1W2Q6F8	101.2	101.3	95.1	100	108	107.8	95.7	96.2
A0A1W2Q6L2	96.2	92.6	99.2	111.6	99.3	105	104.7	103.6
A0A222NUN6	72.5	78.5	157.5	83.6	67.2	65.8	82.5	80.7
A0A3B0J380	90.4	91.4	101.1	115.6	92.7	91.6	102.8	102.9
A0A3G2LW22	106.9	101.6	94.1	104.9	95.5	95.2	99.2	103.8
A0A5C5	94.6	94.4	87.9	102.5	98.1	132.1	96.6	103.6
A0FKI7	103.2	92	90.9	116.8	101.8	99.7	98.4	100.3
A0JN29	110.4	92.2	109.5	98.8	99	95	102.1	98.1
A0JN30	99.6	88.5	90.5	94.7	95.1	93	95.8	98.5
A0JPJ0	114.9	110.7	99.8	100.2	89.7	87.4	92.2	95.3
A0JPJ7	103.3	93.3	102	98.8	96.6	101.3	99.7	96
A0JPK5	97.7	94.8	98.2	104.1	105.4	99.2	98.6	99.6
A0JPM9	100.2	101.6	95.9	100.4	104.7	100.6	99.1	102.1
A0JPN7	104.4	90.3	104.6	96	87.4	83.8	97.9	96.5
A0JPQ5	93.3	94.6	109.8	97.7	101.8	102.6	99.6	95.3
A0JPQ8	94.9	96.4	103.6	101	95.9	99.7	96	95.9
A0MZ67
A1A5L1	92.6	99.6	108.9	103	96.7	103.6	107.5	105.5
A1A5L2	101	102.3	102	95.7	98.7	108.2	102.3	95.5
A1A5P2	100.2	90.9	139.9	93.8	89	83.1	101.6	94.5
A1A5Q1	102.3	99.1	119.2	92.8	95.5	93.9	94.7	99.2
A1A5S1	120.8	96.1	89	98.6	86.6	84.7	97.4	99.1
A1A5S2	113.3	94.4	96.8	90.3	87.2	80.3	118.8	96
A1KXK4	125.8	109.6	93.3	96.4	91.9	108.5	90.8	83.7
A1L108	108.7	102.4	100.7	97.6	91.4	93.5	103.1	98.4
A1L122	97.1	89.9	100.1	95.3	95.7	101.3	92.9	96.8
A1L127	133.4	91.2	78.7	93.9	94.3	82.6	91.4	92.6
A1L128	124.4	89.1	103.7	97.9	161	54.4	84.2	96.2
A1L134	116.8	89.4	88.4	96.5	102.2	107.2	109.1	92.3
A1L1J6	87.2	90.1	82.9	95.8	95.6	81.3	104.4	103.9
A1L1J8	101.2	96.9	93	103.1	92.5	104.2	120.7	115.6
A1L1J9	109.7	90.7	96.5	102	88.2	90.9	97.6	99.8
A1L1K8
A1L1L2	101	102.4	91.8	104.7	87.3	87.5	95.9	99.7
A1L1L5
A1L1M0	97.9	84.3	96.6	91.3	94.7	95.7	106.9	100.5
A1XF83	63.9	52.5	51.4	52	226.5	50.2	223.4	46
A2IBE0	94.2	97.2	103.9	96.4	101.8	103	104.1	105.4
A2RRT9	111.6	90.8	95.1	105.7	101.3	103	100.4	103.9
A2RRU1	119.5	88.5	92.2	100.4	111.5	101.4	103.6	93.9
A2RRU3
A2RUW1	107.7	119.8	95.3	96.1	94.8	98.7	92	97.6
A2VCV7
A2VCV8	110.6	111.8	99.5	88.4	96.8	89.3	94.4	93.5
A2VCW7
A2VCW9	120.1	97.9	71.7	98.9	115	116	88.9	91.7
A2VCX1	98.3	88.5	95.2	112.4	95	95.9	108.5	103
A2VD09	90.9	101.1	101	91.5	97.6	95.4	125.5	102.6
A2VD12	95	118	111.6	99	94.3	115.2	112.1	114.1
A3KN98	117.5	106.4	88.3	95.1	86.2	82.9	119.5	90
A3KNA0	107.7	90.2	98.6	101.3	99.2	104.1	104.1	105.7
A3RLA8	105.2	94.5	97.7	96.5	102.7	92	121.6	106.7
A4GW50	110.9	101	98.9	86.7	101	87.4	98.7	97.4
A4L9P7	118.5	99.3	94.4	95.9	90	91.6	97	96.3
A5HKJ3	84.7	118.8	83.6	131.2	75.7	102.2	70.7	116.5
A5I9F0	86.5	119.6	139.4	84.9	80.4	106.8	103.1	107
A7BFV9	103.7	101.4	97.8	99.4	93.2	94.4	99	101.5
A7E3N2
A7XYB9	120.1	128.4	97.5	95.4	85.8	93	90	99.5
A8C4G9
A8QIC3	113.2	94.8	117	100	89	96.5	91.7	94.5
A8WCF8
A9CMB8
A9EEP5	96.6	88.5	105	91.2	93.4	91.4	96.8	91.8
A9UMV9	101	98.8	93.5	103.5	99.8	97.7	98.8	98.2
A9UMW0
A9UMW3
B0BMS8	82.8	147.8	131.3	91.1	91.7	116.7	98.4	103.2
B0BMS9	137.6	96.5	113.9	88.4	82	82.5	75.3	72.3
B0BMT9	192.3	87.8	70.5	80.5	64.6	84.1	77.7	87
B0BMU0	93.5	84.6	78	86.6	81.5	85.6	97.4	105.9
B0BMU7	92.9	84.9	106.8	151.6	100.5	90.8	97.9	90.8
B0BMV4	66.7	58.4	56.7	63.7	57.1	58.7	61.8	71.1
B0BMW0	100.5	102.8	108.7	106.4	92.4	94.2	95.7	100
B0BMW2	107	99.2	94.1	101.2	100.4	105.1	95.4	102.6
B0BMX3
B0BMY6	95.4	113.8	104.6	99.5	102.7	100.5	94.9	94.5
B0BMY7	108.6	108.6	93.8	99.2	83	78.1	113.4	111.2
B0BMY9
B0BMZ1	95.7	90.6	101	109.7	96.1	119.9	101.9	119.6
B0BMZ3	102.8	92.2	81.8	89.7	85.1	90	107.2	105.8
B0BN06	100.7	89.9	96	152.4	94.2	90.5	93.9	98.6
B0BN18	100.9	101.3	103.5	111.4	105.6	90.4	97.4	97.6
B0BN19	99.2	85.4	89.7	101.6	93	87	99	97.4
B0BN30	110.7	91.1	90.8	107.9	95.6	100.3	106.4	99.1
B0BN33	87.4	84.9	108.8	101.3	108.7	92.3	101.9	113.6
B0BN35
B0BN43	90.7	87.7	97	116.5	79.3	82	94.3	91.6
B0BN46	103.8	104	95.7	95.1	105.1	101	101.7	99
B0BN53	218.5	122.2	84.1	80.8	47	45.1	76.1	66.6
B0BN55	87.5	83.6	86	159.9	99.9	97.3	102.4	98.3
B0BN56	108.6	111.8	99.4	104.3	98	89.4	98	98.4
B0BN63	98.3	105.4	99.5	97.3	93.1	92.9	98	100.4
B0BN68	96.6	92.6	95.7	101.9	106.3	101.7	99.1	96.2
B0BN72	98.4	96.3	128.1	109.1	102.2	92.7	91.9	73.9
B0BN81	103.3	96.8	95.5	110.7	91	90.7	97.4	99.3
B0BN83	110.2	72.8	84.2	97.7	110.8	103	109.5	99.4
B0BN85	96.4	84.4	99.5	114.4	100.7	95.2	103.1	94.4
B0BN86	117.9	113.6	94.6	103.5	100	95.3	94.9	92.7
B0BN90
B0BN93	103.9	94.1	94.2	101.9	96.6	94.1	102.3	100.7
B0BN94	96.5	105.6	102.6	102.8	113.2	99.5	94.7	95.9
B0BN97	96.4	114.3	131.9	93.5	92.2	88.9	88.4	98.3
B0BN99	116.7	91.6	98.5	94.8	92.8	85.9	96	95
B0BNA1	171	94.4	57.4	105.3	63.4	57	99.7	118.9
B0BNA3	117.7	90.4	94.5	129.9	101.8	85.3	103.3	92.3
B0BNA5	93.5	78.8	130.8	105	85.6	93.3	108.1	92.2
B0BNA7	104.4	90.7	97.1	95.9	94.4	93.8	104.8	99.9
B0BNA9	120.9	128.8	120.1	132.4	99.7	117.1	85.2	82.3
B0BNB1	109.1	108.8	92.7	107.9	102.4	98.7	113.1	110.2
B0BNB2	119.6	95.5	99.6	99.2	97.6	95.2	93.6	85.6
B0BNB3
B0BNB4
B0BNB5	105.4	98.3	99.4	101.9	89.1	89.5	96.9	95.7
B0BNB9	106.6	93.8	97.5	103.3	110.6	99.4	101.2	99
B0BNC9	99.2	78.3	114.3	94.7	72.3	68.6	107.9	110.1
B0BND5
B0BNE1	131.9	93.3	105.7	101	81.9	78.7	101.6	100.6
B0BNE2	102.9	106.1	116	97.1	90.2	91.8	97.4	93.7
B0BNE3
B0BNE5	102.2	99.7	96.8	99.2	103.4	100.1	105.9	99.4
B0BNE6	104.5	108.8	87.5	96.6	97.3	96.3	95.2	102.1
B0BNE9	79.9	69.6	87.9	146.2	82.3	82.9	86.2	93.7
B0BNF9	102.9	101.5	99.5	101.5	111.7	110.4	94.6	90.9
B0BNG0	97.3	95.9	97.2	96.8	97.6	97.2	96.8	99.4
B0BNG1	106.7	104.4	92.3	108.7	96.8	105.3	93.3	103.7
B0BNG2	85.6	115.1	97.9	100.4	95.1	133.9	86.5	81.2
B0BNG3	105.3	97.1	96.6	119.2	95.1	102	97	89.4
B0BNG5
B0BNI2	77.6	112.4	91.2	95.2	80.5	84.7	96.8	105.7
B0BNJ1	90.7	103.6	112.6	98.1	92.5	97.2	104.8	101.4
B0BNJ4	119.4	92.4	84.6	91.9	106.8	98.9	98	97.2
B0BNJ9
B0BNK0
B0BNK1	128.7	97.1	95	107.6	83.4	87.3	98.9	96.5
B0BNL2	107.6	106.7	100.8	84	92.7	95.1	91.2	94.3
B0BNL5	89.1	98.5	92.2	113.2	95.6	107.6	110.5	94.2
B0BNM0	104.7	101.7	97.4	96.4	105.9	111.4	96	90.6
B0BNM1	94.3	94	101.8	94.8	108.7	104.6	102.8	97.1
B0BNM2	84.2	100.6	91.5	101.2	98.6	94.8	105.9	88.7
B0BNM3	111.1	103.1	96	108.1	90.9	88.6	93.5	98.8
B0BNM4	105.6	110.3	99	102.8	93.9	93.8	100	101.6
B0BNM6	106.7	176.8	154.7	99	91.1	86.1	80.6	76.8
B0BNM9	91.4	83.3	90.7	89.7	97.5	89.8	110.3	116
B0BNN1	99.3	95.6	93.9	136	80.3	75.2	88.8	96.9
B0BNN3	92	115.2	82.9	95.5	85.1	94.3	104.2	147.5
B0BNN4	79.1	83.2	117.6	104.7	92.6	98.5	113.2	105.6
B0K008	88.9	100.4	93.8	101.7	113.5	121	97.6	94.4
B0K010	112.6	102.6	98.1	104.8	93.3	95.6	105.3	102.2
B0K013	108.4	113.1	135.3	99.1	96.6	87.7	89.1	91.1
B0K014	108.4	79.2	96.2	93.3	124.6	108.5	108.5	92.7
B0K015	92.7	89.8	119.9	101.3	111.6	99.8	96.9	89.3
B0K017	96.6	87.8	101.2	95.8	102.7	99.3	110.3	94.6
B0K019	96.5	94	98.4	95.9	103.3	97.6	102.1	91
B0K020	93.8	108.9	99.1	102.5	98.8	105	95.7	109
B0K026	107.3	97.5	90.9	97.6	98.2	99.8	102.1	105.7
B0K030	95.5	106.8	107.7	113.1	104.7	104.3	104.8	97.6
B0K031	84.8	91.1	107.5	110.6	90	110.7	101.8	111.1
B0K034	96.5	80.9	82.1	92.2	97	96.4	97.6	90.1
B0LT89	106.9	117.7	104.6	103.2	89.1	90.5	92	95.5
B1A2U8	113	99.4	101	96.3	101.8	95.4	98.4	93
B1H223	101.6	109.5	102.4	91.8	95.1	78.3	100.4	115.4
B1H227	92.9	99.6	99.9	102.6	98.4	97.7	98.2	105.3
B1H230	107.8	85.6	99.3	95.6	97.4	97.3	99.3	100.8
B1H241	125.8	100.7	79.9	92.1	78.4	79.1	95.4	91.3
B1H248	95	102.3	97.2	99.3	102.9	102.1	105	102.4
B1H249	104.4	91.6	100	98.9	107.7	103	100.7	89.8
B1H250	93	100.4	98.2	100.8	117.1	106.7	97.4	101.1
B1H253	88.2	98	82.7	105.8	84.6	100.6	100.3	120.9
B1H257	164.2	106.8	133.6	73.4	94.2	45	83.3	98.8
B1H259	108.4	88.5	93.9	93.3	75.1	84.2	101.1	105.9
B1H260	101	78.9	84.9	105.8	104.5	105.4	114.9	114.4
B1H261	80.1	111.8	160.3	78.2	89.5	71	90.1	105.4
B1H262
B1H264	83.2	92	116.3	109.3	119.2	120.5	102.3	97.3
B1H267	102	97.9	101.6	106	102.3	95.8	96.9	93.8
B1H269
B1H270	98.6	106.2	108.4	101.4	107.2	104.1	93.3	94.2
B1H271	100.7	88.1	91.8	100.4	110.7	103.6	100.4	90.5
B1H282	97.8	111.2	103.5	95.2	90.7	88.9	107.5	107.9
B1H297	102.1	62.7	81.2	105.2	95	100.1	87	108.6
B1H2A6	135.9	99.7	96.6	99.1	84.5	83.4	89.6	85.8
B1WBN4
B1WBP4	108.5	95.9	90	100.3	92.1	94.1	100	103.5
B1WBQ5	89.7	94.7	116.4	114.5	88.8	89.9	92.1	92.2
B1WBS4	93.7	108.4	95.7	105.2	97.8	100.9	103.3	103.1
B1WBS7
B1WBU9	98.3	109.3	88.5	96.8	105.6	86.9	97.8	108.9
B1WBV4	95.7	80.9	89.3	97.7	97.3	96.1	101.5	100.6
B1WBW0
B1WBW2	110.3	99.1	94.8	101	91.5	95.1	103.6	94
B1WBW4	87.8	109.5	82.1	95.2	120.9	107.4	98.3	111.3
B1WBX5	76.8	133.1	98.4	113.1	70.6	96.7	79.3	143.8
B1WBX6	99.6	108.2	98.6	108.9	86.5	91.1	96.7	101.6
B1WBY1	97.8	91.4	96.4	103.5	99.9	105.4	108.1	102.3
B1WBY5	97.8	98.6	87.2	96.8	100.2	102	100.2	116.2
B1WBY7	91.7	89.8	91.7	101	103.4	97.2	104	107.5
B1WBY8	91.3	100.2	114.4	98.7	110.9	102.8	102.3	98.2
B1WBZ6	92.9	111.7	93.2	91.9	84.1	76.1	114.9	143.4
B1WC04	146.3	94.2	102.7	102.9	90.8	92.7	95.7	96.6
B1WC06	134.7	110.9	98.3	93.7	76.8	76.5	99.6	107.7
B1WC11	139.1	128.6	72.3	91.8	80.1	85.1	84.7	88.5
B1WC16	102	107.5	115.1	98.1	101.6	96.6	90.8	88.2
B1WC24	87.6	90.6	101.7	134.2	77.4	115.6	88.8	109.2
B1WC25	101.7	92.8	94.1	91.3	89	98	94.3	103.8
B1WC26	107	113.2	102.8	92.7	98.2	97.8	97.6	100.8
B1WC28
B1WC29
B1WC32	105.9	94.2	100.8	96.8	90.8	90.2	97	100.6
B1WC33
B1WC34	94.1	94.8	104.3	106.4	109.2	102.5	101.1	92.9
B1WC37
B1WC40	86.3	109.7	109.5	97	93.9	97.4	109.5	102.6
B1WC43	81.1	96.6	98.4	106.2	87.3	89.5	116.4	101
B1WC49	94.7	97.9	99.7	105.9	99.5	99.8	99.1	104.9
B1WC56	105	59.8	107.9	100.8	123.1	103.4	99.6	89.2
B1WC61	102.6	98	97.9	102.4	104.4	106.2	95.7	95.9
B1WC66	91.9	84.5	88.9	98	97.6	96.8	96.9	88.5
B1WC67	83.9	74.3	141.2	100.2	92.1	102.3	97.1	95
B1WC70	127.1	94.2	175.7	82.9	95.1	76	86.9	76
B1WC71	98.3	92.2	91.6	102.5	105.8	100.2	94.6	93.8
B1WC73
B1WC75	143.4	96.1	81.4	128.3	124.6	99.7	89.8	100.1
B1WC77
B1WC84	102.1	100.4	99	98.6	96.4	91.8	94.3	104.1
B1WC85	88.7	100.3	72.7	98.2	77.2	72.1	122.7	146.6
B1WC88	96.5	90.9	88.4	112.1	93.9	95.9	113	123.2
B1WCA2
B2B9A9
B2BKY8
B2GUU0
B2GUV5	135.4	86.7	109.2	107.7	96.4	93.1	95.6	80.4
B2GUV6	85	89.3	89.7	82.8	91.8	84.4	90.7	85.1
B2GUV7	97.7	100.2	103.1	97	97.4	97.4	98.5	101
B2GUW4	73.6	88.3	107	186.8	75.4	91.9	92.5	84.9
B2GUX5	97	102.5	98.9	95.9	96.9	101	97.9	101.7
B2GUX7	95.1	89.9	99.1	88	103.9	105.5	109.9	97.4
B2GUX8	91	100.8	113.4	116.8	88.7	94.6	89.3	81.5
B2GUY0
B2GUY2	117.4	96.2	84.1	89.1	89.1	89.2	103.9	103.9
B2GUY4
B2GUZ1	98.3	105.2	98.3	105.4	93.7	97.8	97.9	110.4
B2GUZ3
B2GUZ4	46.2	79.2	57.7	96.1	95.7	110.1	171.2	200.1
B2GUZ5	90.1	101.4	117.4	96.2	93	100.1	102.3	102
B2GUZ6	95.1	103.9	104.5	103.5	101.9	107.7	89.7	101.4
B2GUZ7	117.5	113.7	109.9	97.6	81.9	79.7	101.8	93.9
B2GUZ9	89.1	86.2	96.6	103.5	105.9	88.1	117.2	98.9
B2GV01	95.4	97.9	109.1	106.2	101	92.9	107.4	98.3
B2GV05	109.5	98.8	90.9	115	86.7	94.5	93.2	108.9
B2GV06
B2GV14	146.1	106.8	97.5	94.4	74	68	91.6	99
B2GV15	111.7	89.7	92	93.8	105.8	100	98.7	100.1
B2GV19	117.3	106.8	128.1	146.5	99	109.3	110.4	101.1
B2GV20	95.2	85.8	92.3	91.6	60	118	145.7	108.8
B2GV24	102.3	97.1	102.3	109.2	101.3	96.9	95.2	97.6
B2GV38	168.9	85.4	93.4	91.3	80.9	78.2	81.3	102.4
B2GV39	157.8	100.4	90.3	88.3	85.5	86.8	89.8	88.2
B2GV41	100	91.6	92	97.3	87.7	87.1	94	98.5
B2GV51	104.2	107.8	99.9	95.3	105.1	102.2	99.1	102.2
B2GV52	111.4	103.9	98.2	101.9	90.1	87.8	100.5	92
B2GV53
B2GV54	84.8	75.9	97.5	122	120.4	111.2	93.3	82.5
B2GV57	93.4	91.8	96.5	117.6	97.5	99.9	103.7	99.8
B2GV58	118	87.8	108.4	119.9	101.4	111.4	97.2	109.4
B2GV62	137.3	86.1	93.8	95.6	83.1	82	82	96.6
B2GV65	91.5	77.1	87.5	101.3	134.2	110.9	119.9	87
B2GV71	102.3	120.6	93	102.9	97	88.9	94	97.8
B2GV72	101.6	106.7	112.9	107.9	93.7	101.6	98.6	100.5
B2GV73	108.7	92.3	113.2	104.8	98.6	94.3	100.4	101.3
B2GV94	98.2	113.4	110.6	111.4	86.2	98.7	106.1	102.2
B2GV96
B2GV97	98	99	100.1	99	100.5	101.8	99	104.2
B2GV99	89.7	89.6	105.5	102.9	100.9	101.8	110.4	100
B2GVA1	101.7	108.9	96.1	99.8	108	103.6	104.1	100.9
B2GVA4	116.1	99.8	89	108.9	99.9	92	104.6	91
B2GVB9	96.1	89.5	110.1	99.5	103.4	101.7	101.7	96.8
B2RYA5	88.3	89.2	82.1	82.9	87.6	94.8	93.8	108.3
B2RYA6	107.6	111.8	104.3	110	96.3	100.3	93.6	90.4
B2RYA8	102.4	90.4	86.2	91.3	99.3	102.8	105.5	97.7
B2RYB1	107.9	105.9	85.2	105.9	83.7	82.8	127.2	113.9
B2RYB8	87	89.8	121.2	131.6	85.4	85.7	108.3	97.5
B2RYC1	114.5	83.8	96.7	102.3	96.6	84.5	108.8	101.9
B2RYC6	80.8	102.6	94.4	127.7	83.7	72.3	72.1	78.7
B2RYC9	114.7	92.5	92.1	99.5	101.3	95.8	99.8	98.2
B2RYD0	109.4	131	88.5	106.1	88.2	86	89.9	115.2
B2RYD7	99.6	105.9	107.9	100.2	90.1	97.8	92.8	104.9
B2RYE8
B2RYF1
B2RYF6	92.4	93.7	87.4	122.8	88.6	86.5	103.6	106.1
B2RYF7	104.6	105.5	91	109.5	99	94.9	96	100.4
B2RYF8	96.7	95.7	113.9	103	104.3	103.3	97.3	97.7
B2RYG2	85.6	82.6	98.9	89.7	90.7	88.8	94.8	102
B2RYG5	96.2	103.8	95.6	99.4	96.4	94.7	94	86.5
B2RYG6	95.3	109.1	106	100.3	99.2	100.1	104.6	95.9
B2RYH2	104.2	97.6	98.3	88.2	90.5	92.4	96.4	99.9
B2RYH5	97	89.1	99.5	225.7	89.9	81.1	98.9	75.6
B2RYH6	114.1	101.8	102.3	103.7	89.4	89.3	106.8	92
B2RYI0	103.6	107.8	98.3	104.5	91.9	93.9	102.8	105.1
B2RYI2	97.4	96.6	91.9	110	99.5	94.6	103	98.3
B2RYI4	155.8	97.2	91.1	93.7	73.9	69.6	80.1	87.4
B2RYI5
B2RYI6	160.4	90.4	96.6	97.6	79.8	78.2	104.5	100.4
B2RYI8	87.4	91.4	90.9	101.7	88.7	82.9	106.5	99.1
B2RYJ3	92.6	101.4	99.9	100.3	94.5	94.4	96.4	118
B2RYJ4	141	120.8	111.9	107.9	90.4	92.6	102.9	116.4
B2RYJ7	104.6	99.4	102	101.4	101.4	102.7	103.2	104.6
B2RYL4
B2RYL8	107.3	91.1	97.3	92.7	98.2	88	95.4	90.5
B2RYM1	95.1	113.3	97.6	103.8	98.1	95.8	103.3	107.4
B2RYM3	93	96.9	91.7	93.6	89.4	94.7	110.9	110.6
B2RYM5	102.7	96.8	111.7	102.6	100.2	96.2	104.1	105
B2RYM8	124.7	88.2	86.6	95.5	109.3	124.9	98.4	87.5
B2RYN1	100.7	91	92.5	93	107.5	104.3	105.9	97.5
B2RYN3	111.8	94	95.6	90.9	87.6	87.5	93.1	90.5
B2RYN6	107	107.4	95.2	101.3	89.6	92	118.5	100.3
B2RYN7	103.2	109	100.4	95.6	100.3	93.6	104.8	96.5
B2RYP0
B2RYP3	89	101	109.4	105	132.8	109.2	94.5	89.5
B2RYP4	100.2	93.2	94.3	101.6	103.7	99.2	98.4	102.3
B2RYP6	95.2	99.5	108	102.3	95.7	98.2	102.2	101.4
B2RYQ2	98.5	102.6	94.8	99.4	94	93.8	100.8	96.8
B2RYS2	107.9	93.3	96.2	102.2	110.4	105.4	94.3	87.9
B2RYS8	101.3	106.1	99.5	95.7	98.9	100.8	100.5	107.4
B2RYS9	115.6	120.5	84.8	104.1	82.2	81.7	90.1	125
B2RYT4	101.2	96.5	97.9	114.1	94.2	87	107.8	97
B2RYT5	123.5	99.7	109.7	87.1	87.1	94.4	95.8	94
B2RYT7	95.9	111.2	101.5	105.5	102.4	102.7	99	102.9
B2RYT9	92.9	91.3	108.3	117	107	114.8	85.1	85.8
B2RYU6	88.5	95	104.6	96.8	95.5	95	103.6	99.8
B2RYU7	94.4	103.6	106.2	104.2	96.9	94.5	94.4	94.8
B2RYU8	110.5	90.2	88.4	90.7	70.4	68.7	85.1	96.2
B2RYV2	113.8	101.8	102.4	99.4	99.4	91.5	100.4	98.7
B2RYW3	106.5	94.8	91.1	97.3	96.9	93	98.9	100.4
B2RYW4	98	104.8	87	101.4	98.8	100.7	107	110.2
B2RYW7	108.7	102.3	103.1	104.3	96.9	91.9	93.6	97.5
B2RYW9	108.8	102	89.1	106.7	106.2	96.9	104.4	101
B2RYX1	104	95.5	89.3	96.8	124.6	133	106.3	93.7
B2RZ12	112.9	93.4	82.6	115.4	84.3	81.9	112.6	102.7
B2RZ14
B2RZ20	106.9	99.9	123.6	105	93.5	98.8	95.7	91.5
B2RZ22	273.7	63.1	67.9	81.9	86.2	72.4	71.8	70
B2RZ27	92.7	80.3	113.4	116.2	93.6	96.3	97.5	95
B2RZ29
B2RZ33	101.1	114.4	108.1	109.7	95.5	97.3	95	97.1
B2RZ37	86.3	89.9	100.4	112.6	103.9	112.1	111.1	115
B2RZ44
B2RZ46	92.6	100.6	101.2	106.1	101.2	96.3	103.1	105.3
B2RZ57
B2RZ62	126.2	78.7	105.1	111.5	90.5	91.1	100.4	109.4
B2RZ64	116.2	111.4	114.9	96.5	90.7	88.4	94.3	103.6
B2RZ66	122.3	81.9	109.7	104.1	110.2	97	96.4	92.6
B2RZ72	104.1	131.4	110.1	97	88	89.5	93.8	93.1
B2RZ74	100.4	95.8	112.7	103.5	99.8	100.3	96	92.9
B2RZ76	96.5	102.2	98.5	101	94.2	84.7	101.1	104.1
B2RZ77	103.6	117.4	98.8	103.3	82.8	98.1	98.5	112.6
B2RZ79	112.4	96.9	89.9	103.4	96.1	91.8	105.5	89.8
B2RZ96	101.6	101.9	91.3	87.3	87	86.8	109.6	100.6
B2RZ98	83.2	80.5	154.6	139	80.9	73.8	102.3	94.8
B2RZA3	84.3	103.8	98.9	90.8	85.2	98.5	105.4	129.3
B2RZA5	104.4	99.1	96.3	105	105.6	101.3	105.6	93
B2RZA8
B2RZA9	88.8	96.3	103.2	96.5	104.6	105.4	107	102.3
B2RZB1	108.3	89.1	63.5	120.6	87.5	134.2	116.4	74.5
B2RZB5	134.6	85.8	93.2	99.1	85.2	82.2	99.8	107.1
B2RZB6	90.3	102.7	105.7	109.9	95	96.3	99.8	95.9
B2RZB7	87.4	87.2	94.5	102.6	92.7	97.8	101.6	108.9
B2RZC6	80.8	106.9	110.2	101.8	97	107.2	97.4	95
B2RZC9
B2RZD0
B2RZD1	99.4	91.2	96.3	110.3	103.7	99	103	93.3
B2RZD2	114.1	70.8	92.8	94.5	105.2	97.9	124.1	96.5
B2RZD4	80.7	107.5	111.3	106.2	94.5	103.9	100.4	111.7
B2RZD5	90.5	76.8	116.5	119	105.2	102.8	97.1	96.7
B2RZD6	102.5	93.8	88.2	98.1	115.9	108.9	102.4	107.2
B2RZD7	113.2	84.5	101.6	87.4	96	91.1	93.8	94.9
B2ZDP8
B3DMA2	96.5	97.4	100	101.2	100.5	101.2	94.6	102.2
B3DMA5	120.1	94	102.3	98.4	100.8	92.2	95.9	92.9
B3GNI6	98.5	93.4	100.6	95.8	88	87.4	99.2	100.8
B3GS92	99.2	99.5	103.1	103.8	113.6	112.6	110.6	101.3
B3STT9
B3SVE6	107.6	89.2	100.6	105.6	94.5	96.2	95.6	88.7
B3VPA7	91.9	92.7	101.7	99.9	111.6	110.4	91.4	100.4
B4F766
B4F767	105.4	98.7	97.8	99.4	85.1	88.8	95.8	97
B4F768	110.4	104.8	96.2	96	102.9	100.8	97.7	96.7
B4F769	106.5	105.8	96.8	103.1	98.5	90	103.2	86.7
B4F775	66.3	94.2	85.1	116.6	91.9	99.3	108.1	93
B4F777	109.4	94.6	109.6	108	105.2	100.2	92.6	91.2
B4F778	67.8	108.1	99.1	74.3	70.2	67	94.8	135.5
B4F779	88.2	101.8	96.9	110.6	117.1	116.4	110.8	94.9
B4F786	103.9	98	90.4	101.3	104.1	96.8	97.8	99.7
B4F793	90.8	103	86	99.7	83.6	92.9	107.2	112.4
B4F795
B4F7A3
B4F7A5	98.6	90.8	130.1	91	92.3	98.7	94.5	87.7
B4F7A9	101.8	93.8	85.6	99.9	101.5	95.8	101.1	87.9
B4F7B2	99.1	107.1	99.2	102.4	76.1	74.8	129.7	120.6
B4F7C7	108.1	93.3	126.4	101.9	97	97.4	97.9	90.1
B4F7E7
B4F7E8
B4F7F3	104.2	93.2	101	100.9	96.7	92.4	95.2	97.9
B5DEF3	90.1	81.3	89.9	103.4	99.5	105.5	107.1	105.8
B5DEF5
B5DEF6	108.6	105.9	113.8	89.3	93.2	92.8	86.6	109.9
B5DEG7	89.5	105.7	104.1	105.3	103.4	105.6	104.1	95.2
B5DEG8	106.1	93.1	105.1	97.2	94.5	96.4	100.3	97
B5DEH0
B5DEH2	98.8	99.4	99.6	96.4	108.3	91.9	100.5	106.6
B5DEH4	96.6	92.9	105.3	95.9	99	92.3	101.8	99.9
B5DEH7	106.3	84.3	105	105.6	89.5	88.8	104.8	99.1
B5DEI7	101	106.8	97.4	98.7	99.1	98.5	114.6	105.3
B5DEJ5	98.7	93.9	97.8	97.9	100.1	100.9	105	100.7
B5DEK0	116.4	89.9	105.2	116.5	93.6	93.8	102	98.1
B5DEL2	102.5	88.3	96	100.8	96.3	97.7	103.4	94.9
B5DEL8	115.5	105.2	100.7	99.8	95.6	100.4	95.3	98.4
B5DEM3	108.3	96.8	87.9	96.7	103.8	104.3	113.6	96.5
B5DEM5	86.8	89.3	86.6	97.8	86.2	100.3	92.6	99.2
B5DEM7
B5DEN5	112.2	104.5	102.6	100.4	98.3	98.5	95.8	96.1
B5DEN9	123.8	111.1	145.4	100.4	106.2	95.7	107.7	101.3
B5DEP4	102.2	105.2	99.3	102.8	104	101.8	101.9	98.2
B5DEP7	82.4	136.7	133	100	90.7	101.4	79.7	91.9
B5DEQ0	104.5	105.6	129	91.1	112.6	100.9	82.9	69.2
B5DEQ3	108.7	96	104	87.8	91	87.8	95.8	109.3
B5DEQ4	100.9	99.4	109.8	95	94	93.3	97.3	101.7
B5DES0	101.6	90.7	98.1	134.4	100.3	94.4	95.8	90.7
B5DEX3	85.7	115.4	111.1	106.2	112.2	105.7	104.8	97.2
B5DEX4	86.4	87.8	112.9	100.1	99.2	101.6	108.2	104
B5DEY5	108.6	91.6	106.5	93.5	94.6	84.5	97.7	94.5
B5DEY8	98.2	93.4	116.3	97.2	104.9	97.4	94.8	92.2
B5DEZ3
B5DF01	107	101	98.4	98.1	93.1	93	92.4	113.9
B5DF05
B5DF25
B5DF27
B5DF29
B5DF37
B5DF44
B5DF46	101.9	108.4	101.6	97.7	97.4	92	98.5	104
B5DF48	114.8	100.5	97.2	101.8	87.2	85	96.5	104.3
B5DF50	97	101.5	99.9	98.1	92	93.6	109.7	104.4
B5DF51	104.6	118.7	90.1	93.2	89	91.6	93.5	100.9
B5DF55	131.5	86.8	82.4	92.2	85.7	80.7	97.2	97.2
B5DF57	97.4	109.2	83.6	98.8	80.9	100.4	102.8	130.7
B5DF62
B5DF65	95.1	114	100.6	95	91.9	93.9	94.3	105.4
B5DF74	97.1	94.9	88.3	95.2	94.1	92.7	97.2	95.8
B5DF86	96.2	110	93.7	96.2	104.1	104.5	115.3	107.4
B5DF89	97.4	98.2	105.6	99.5	98.9	94.6	105.5	99.9
B5DF91	98.7	89.2	93.1	105.8	102.6	98.4	108.3	104.3
B5DF93	150.4	101.5	98.1	111.3	65	64.1	64.6	70
B5DFA1	105.8	95.7	92	127.6	81.5	77.6	94.9	102.1
B5DFA3	98.8	95.4	96.8	103.8	120.4	94.7	96.9	100.4
B5DFB2	99.3	97.4	105.1	98	95.2	101.6	105.2	101.1
B5DFB4
B5DFC3	104.6	101.5	99.1	102.2	93	94.3	100.6	100.8
B5DFC6	87	95.8	133.8	113.2	86.4	90.7	109.6	102.9
B5DFC8	104.8	94.3	103.4	99.9	97.9	98.3	98.5	96.7
B5DFD1	98.4	120	85.9	97.7	88.6	89.6	96.9	125.5
B5DFD6
B5DFD8	88.3	104.7	102.2	95.3	99.8	102.3	114.9	95.2
B5DFE0	101.9	98.8	99.9	100.2	101.2	93.9	96.5	101.9
B5DFF2
B5DFF4	104.4	113	107.3	112.5	103.5	94.8	98.1	102
B5DFG9	104.2	107.2	94.8	98.1	98.2	87.4	100.1	99.1
B5DFH8	107.4	97.5	94.8	100.2	96.3	87.5	107.4	123
B5DFI3	88.7	122.3	113.1	110	93	90.3	100.9	109.2
B5DFI7	110.8	115.9	96.1	95.6	86.4	89.6	100.1	101.7
B5DFI9
B5DFJ4	110.7	97.7	109.2	101.4	84.8	85.4	99.9	98.6
B5DFK0	110.8	80.2	104.2	104.4	101.1	102.8	120.4	97
B5DFK1	99	112	99	98.8	91.1	96.2	102.7	104.6
B5DFK6	96.2	92.1	108.3	99	92.3	90.1	102.5	101.2
B5DFL0	108.6	89.3	105	96.9	100.5	93	93.8	98
B5DFM8	110.7	104.5	103.6	92.8	94.6	91.4	98.4	105.1
B5DFN2	84.6	122	111.7	97.2	103.4	104.9	100.7	95.4
B5DFN4	87.3	91.5	102	106	110.8	102.1	100.9	98.1
C0JPT7	87.8	94.3	114.7	102.5	92.4	97.5	100.9	102.4
C0KUC6	93.5	107.7	105.6	99.3	98.2	97.7	97.1	102.5
C0M4B0
C6JUQ2
C6ZII9	132	155.6	79.3	86.6	84.1	98.2	93.6	82.7
C7C5T1	89	102	99.1	112.2	115.5	96.4	103.2	88.6
C9WPN6	102.6	92.6	100.7	99.7	95.5	94.6	96.9	96.2
D1M8S3	220.3	68	70.8	90.6	83.1	72	78.3	71.2
D2XV59	92.7	107.5	103.5	105.6	93.3	96.2	97.2	103.4
D3JVU6
D3KR63	115.4	105	81.1	82.1	66.3	61	112.2	152.8
D3Z7Y6	110.4	111.1	120.9	91.6	98.6	70.8	95.9	106.2
D3Z7Z5	113	95.2	103.9	89.6	88.2	78.3	103.4	102.6
D3Z853	98.4	95.3	95.5	107.7	105.5	104.7	117.6	97.4
D3Z863	115.8	99.1	116.8	101.5	95.4	97.5	92.4	92.8
D3Z890	118	119.6	123.1	157.7	70.9	82.3	66.1	76.5
D3Z898	92	94.5	110.9	98.8	94.3	92.7	101.8	111.5
D3Z8B0	93.2	97.4	97.2	97.5	109.5	92.2	100.5	90.4
D3Z8B2	94.5	109.4	93.5	100.8	84.8	87	107	116.6
D3Z8B6	99.3	107.1	97.3	100.2	108.2	101.7	99.1	102.2
D3Z8D7	105.4	104.5	101.2	104.2	103.2	99	102	100.1
D3Z8E0	89.9	106.9	108.7	101.1	83.7	91.4	106.8	118.3
D3Z8E6	107.9	113.9	123.5	107	85.5	87.9	94.5	91.5
D3Z8F1	97.5	92.8	94.7	94.5	97.4	106.3	98.7	97.6
D3Z8G7	108.2	103.5	103.8	95.3	99.5	98.8	99.6	99.6
D3Z8I7	107.1	94.7	93.1	99.3	98.3	87.3	107.8	94.3
D3Z8K0	82.6	112.7	97.5	105.7	92.1	93.7	92.7	94.1
D3Z8K5	104.2	102.6	93.8	95.1	87	92.5	106	109.7
D3Z8L7	107.1	96.5	100.8	101.3	99.6	93.4	101	100.2
D3Z8M3	99.8	101.6	92.4	107.7	93.5	100.5	110.3	96.5
D3Z8M8	97.8	76	94.4	94.5	118.7	108	115.4	96.7
D3Z8Q6	108.5	132.6	121.4	113.4	86.2	94.7	88.3	101.8
D3Z8Q7	95.4	110.8	108.8	93.2	88.2	100.1	96.7	116.9
D3Z8R4	90.6	93.4	103.2	100.7	103.2	99.2	98.1	95.3
D3Z8S0
D3Z8W0	100.4	106.2	104.7	80.8	106.6	98.2	96.2	96.2
D3Z8X6	117.1	96.5	99.4	107	100.2	96.4	101.1	102.6
D3Z900	92.1	110.2	102.3	99.4	88.3	99.9	106.1	116
D3Z916	110.2	105.8	106	108.2	95.5	99.2	103.9	96.9
D3Z937	90	101.7	100.3	95.4	98.8	96.8	111.3	104.1
D3Z941	128.3	96.6	97.6	97	95.3	91.2	96.8	97.9
D3Z946	89.4	108.6	104	99.8	95.1	99.2	90.2	100.7
D3Z949	89.8	112.1	95.5	103.1	99.5	103.1	98.2	113.2
D3Z955	93.6	97.1	106.4	102.3	91.7	96	105.6	118.4
D3Z994
D3Z9C0	109.7	93.1	118.3	94.8	100.1	107.8	102.2	94.4
D3Z9D2	98.6	108.6	92.7	94	97.2	93.9	100.4	102.8
D3Z9E1	86.6	76.4	126.3	111.2	90	94.5	106.2	102.6
D3Z9E6
D3Z9I1	137.1	88.3	91.5	97.4	95.7	85.5	93.7	97.8
D3Z9I3	94.5	91.4	91.6	118.5	83.8	78.7	85.4	104.9
D3Z9J8	84.4	91.9	105.4	97.9	106.6	104.8	105.1	95.5
D3Z9K2	96.1	107.5	91	103.9	81.7	94.1	88.4	105.1
D3Z9K4	105.1	101.6	101.3	117.2	89.8	90.6	108.7	116.9
D3Z9L0	116.9	84.2	120.6	91.9	107	102	97.5	92.2
D3Z9L5	112.5	94.7	74.8	104	80.2	78.6	107.3	130
D3Z9P1	82	79.2	101.2	100.4	111.9	125.1	106	98.7
D3Z9R8	99.5	94.6	94	97.4	103.9	110	102.4	105.7
D3Z9U2	96.1	107.6	104.1	111.3	95.1	79.8	111.7	110
D3Z9X5	71.5	85.1	108.9	106.1	104.5	114.9	108	104.5
D3Z9Z0	89	117	90.6	98.6	80.5	97.6	99.9	126.9
D3Z9Z2
D3ZA22	99.5	95.9	99.1	90.6	89.5	86.8	105.8	108
D3ZA31	93.1	157.2	118	95.5	68.2	83	83.4	71.9
D3ZA66	119.6	99.9	101.8	108.4	93.7	93.3	87.4	88.1
D3ZA84	106.5	101.3	100.6	98.2	94.4	95.1	99.4	96
D3ZA85	96.6	100.1	98.8	100.3	105	100.2	102	101.7
D3ZA88	124.1	92.7	118	80.1	74.5	78.3	98.4	104.2
D3ZA93	97.5	116.9	83.8	87.7	97.3	100.5	95.7	111.7
D3ZAC0	96.6	99.2	94.1	101.7	91.7	94.5	95.8	104.6
D3ZAE6	115.4	71.7	77.6	90.3	105.2	113.2	107.5	95.4
D3ZAE9	72.7	80.4	178.1	111.7	141	120	111.2	134.4
D3ZAF6	101	109.9	106.8	98.2	92.6	96.3	99.7	106.1
D3ZAF7	99.9	95.7	101.8	103.5	78.5	86.1	98.9	92.5
D3ZAH3	84.2	100.5	85.3	197.4	69	73.1	90.1	91.5
D3ZAI0	110.7	94.3	103.4	97.8	82.4	81	99.8	102.1
D3ZAM3	143.5	125	90.4	106.1	89.2	84	83	130.7
D3ZAN3	94.7	103.6	101.8	96.9	102.4	96.2	102.2	101.7
D3ZAP3	70.7	138	114.5	133.9	71.7	99.3	92.9	131.1
D3ZAP9	101.4	97	91.2	99.9	107.9	102.1	101.2	96
D3ZAQ0
D3ZAQ6
D3ZAR8	105.8	118.2	107.8	89.5	89.6	89.9	101	96.8
D3ZAS8	99.7	115.6	99.7	96.5	95.1	96.2	98.3	101.6
D3ZAS9	108.1	86.8	95.3	103.7	101.2	98.5	103.8	99.9
D3ZAW2	98.4	93.8	99.8	100.2	109.4	104.8	99.2	94.4
D3ZAW4	96.1	107.9	99.6	100.3	95.3	97.2	88.9	100.5
D3ZAW6
D3ZAX5	105.3	99.3	97.1	103.4	95.2	94.2	96.9	101.2
D3ZAY8	94.3	98	120	97.3	92.3	93.1	96.7	95.3
D3ZAZ0	121.3	108.8	118	98	98.9	94.8	90.1	90.8
D3ZB48	99.4	98.7	98.3	137.1	97.5	88	86.2	85.2
D3ZB65	109.2	101.7	96.7	94.3	90	91.1	103.2	95.5
D3ZB96
D3ZBC7	75.5	87.9	126.2	99.8	108.7	98.5	106.6	102.3
D3ZBG6	94.6	91.9	96.3	84.7	108.9	98.4	114.2	97.5
D3ZBH5
D3ZBL5
D3ZBL6
D3ZBM0
D3ZBM3	119.1	74.3	96.2	89.5	94.1	111.2	95.9	97.1
D3ZBN0	79.9	103.6	139.7	100.4	82.7	109.6	92.6	110.7
D3ZBP3	90.9	100.4	94.3	96	94.9	94.8	116.1	111.9
D3ZBS2	102.5	106.6	93.1	97.8	93.8	97	106.8	106.2
D3ZBX0	24.8	42.5	35.9	33.2	285.6	20.2	321.9	15.5
D3ZC01	104.6	94.5	123.8	98.9	91.2	83.8	95.9	96.2
D3ZC46	98.5	116.1	89.8	118.5	103.6	104.4	116.6	93.9
D3ZC54	94.1	66.2	82.7	81.5	101.1	58.8	146.2	117.5
D3ZC56	102.5	98	94.8	100.8	103.6	93.9	105.2	100.8
D3ZC63
D3ZC81
D3ZC82	110.2	92	81.8	96	87.9	83.7	90.4	91.6
D3ZC89	112.8	102.4	149.5	83.9	75.5	64.5	91.4	123.2
D3ZC96	101.6	109.6	95.3	98.2	87.9	90.9	109.2	101.9
D3ZCA0	107.7	97.4	101.1	94.4	110.1	102.2	101.3	99.8
D3ZCD4	107.6	103.4	94.1	98.1	92.7	87.3	100.8	94.4
D3ZCF8	94.8	85.1	101.1	102.3	109.5	98.7	106	110
D3ZCG2
D3ZCG3	109.6	96.4	98.4	95.1	88.5	89.4	102.4	108.9
D3ZCG4	78.6	131.4	88.1	88.7	92.3	97.5	113.6	114.4
D3ZCH6	88.9	88.9	116.7	95.9	101.9	94.3	102	102.5
D3ZCI5	96.3	95.7	93	100.3	94.5	98.7	110.6	101.3
D3ZCJ3
D3ZCK2
D3ZCL3	96.1	100.8	107.3	97.9	103.6	99.5	98.9	97.8
D3ZCQ2	79.7	88.7	75.7	213.7	68.2	63	79.4	79.5
D3ZCR4	100.5	76.2	105.5	119	105.1	107.4	110.1	106.7
D3ZCS3	113.2	96.1	95.1	100.1	96.1	95.9	90.3	94.6
D3ZCS9	96.9	92.2	92.5	99.1	108.2	101.9	97.4	93.8
D3ZCT5	97.4	103.5	93.7	92.8	83.5	95.6	96.3	102.2
D3ZCT7	103.5	92.7	89.7	102	88.6	87.7	115.1	111.7
D3ZCW5	99.3	117.1	135.1	82.1	84.9	86.3	75.5	96.3
D3ZCZ9	103	98.8	87.8	101.3	106.4	101	99.1	98.9
D3ZD02	106	84.9	76.3	115.4	61.8	73.1	100	142.9
D3ZD03	101.5	107.6	92.3	89.8	92.3	92.3	97.1	106.2
D3ZD05	92.6	89.2	94.7	99	93.4	100.6	94.7	97.9
D3ZD09	101.5	100.1	96.7	100.2	107.5	100.5	100.9	109.3
D3ZD11	99.7	90	116.5	101	103.4	101.6	100.1	94.1
D3ZD19	90.2	103.7	100.5	105.6	105.5	101.9	100.8	93.8
D3ZD23	97.4	105.5	97.1	95	97.7	103.4	98.8	99.8
D3ZD31	104.4	88.1	93.1	100.9	102.3	91.9	107.4	104.4
D3ZD46	110	94.8	86.9	89.2	101.9	95.4	116.5	98.7
D3ZD73	110.7	99.9	114.4	96.8	88.7	82.7	97.3	99.9
D3ZD79	117.8	86.5	79.8	87.7	80.7	85.2	127.1	90
D3ZD80
D3ZD88	108.2	84.6	113.1	176.9	86	82.6	86.7	83.2
D3ZD89	105	91	96.5	102.1	89.2	85.5	93.3	96.5
D3ZD97	100	94.3	101.6	104.7	93.7	95.4	98.1	99.9
D3ZDB9	111.8	105.2	100.2	94.3	94.2	95	100	99.2
D3ZDF3	79.2	83.8	100.1	142.2	72.5	83.6	111	84.8
D3ZDI6
D3ZDI7	98.8	104.5	94	91.9	111.1	99.2	96.8	90.8
D3ZDK7	103.5	104.8	98.3	95.4	89.2	95.3	104.9	97.8
D3ZDM4	38.6	23.7	36.7	47.5	66.2	103.3	516.5	58.7
D3ZDM7	89.5	108.2	100.9	96.5	107.6	100.6	99	102.2
D3ZDP2	114.4	98.2	111.3	102.8	98.8	90.3	93.5	91.1
D3ZDR2	111.9	100.3	90.2	93.3	80.4	80.1	104.3	120.8
D3ZDS2	86.1	109.6	115.9	111.8	96.2	98.2	99.1	104
D3ZDU2	136.3	86.4	89	101.9	77.3	77.2	89.9	99.4
D3ZDU5	86.5	97.7	137.1	106.2	86.2	91.3	87.5	88.7
D3ZDW3	103.9	105.8	95	96.8	90.9	95.8	94.3	98.1
D3ZDX7
D3ZDZ1	101	80.8	91.5	100.8	103.6	96	109.1	106.1
D3ZE02	78.6	113.5	121.2	107	122.4	134.5	117	110
D3ZE10
D3ZE15	128.8	100.9	87.4	104.1	91.2	96.9	93.4	100.1
D3ZE30	110.7	100.8	112.3	97.8	95.9	85.3	99.4	89.7
D3ZE49	123.8	86.3	102.6	105.3	91.6	95.7	106.7	100.4
D3ZE72	93.3	109.5	106.8	96.2	99.9	118	94.5	97.2
D3ZEA0	104.3	83.3	86.1	107.5	90.9	94.5	98.1	87.5
D3ZEE9	94.6	89.9	99.6	105.9	102.5	99.2	105.5	106.3
D3ZEG8	98.7	89.6	99.9	103.2	111.4	91.1	95.8	91
D3ZEH1	97.3	96.7	100.6	99.9	111.6	102.3	110.7	98.1
D3ZEH2	145	99.3	95.4	101.6	109.5	108.4	90.7	84.7
D3ZEH3
D3ZEH6	95.8	97	96.4	98.1	107.7	104.5	101.4	96.8
D3ZEI6
D3ZEJ9
D3ZEL2
D3ZEM8	81.8	96.2	117.6	113.2	106.9	104.3	98.3	83.7
D3ZER6	94.3	102.3	88.8	95	89.9	92.6	105.6	109.4
D3ZER8
D3ZEY0
D3ZEY4
D3ZF11	100.9	103.4	129.6	100.6	94.6	95.3	90.2	90.9
D3ZF12	108	77.2	88.5	93.6	98.8	94.6	100.6	98.7
D3ZF13	130.9	84.2	93.8	100.3	113.1	115	88.3	81.2
D3ZF16	99.5	85.9	88.9	87.9	95.2	101.5	98.5	101.2
D3ZF21	88.6	96.5	107.7	138.3	109.8	113	93	105.5
D3ZF26	94.5	101.9	91.2	106.8	95.9	94.2	100.4	101.5
D3ZF39	99.8	122.7	97.1	101.3	63.5	51.9	116.1	126.6
D3ZF45	87	116.3	93.3	107.2	121.5	108.6	101.3	101.4
D3ZF49
D3ZF54	86.1	91.6	108.9	101.3	113	104.9	102.8	104.2
D3ZF56
D3ZF77	109.1	88	107	105.8	95	91.9	104.3	98.6
D3ZF97	110.3	99.3	90.6	100	94.6	83.4	102.2	99.1
D3ZF99	151.7	74.4	68.5	85.9	79.2	82	81.8	65.4
D3ZFA8	92.4	110.5	112.7	101.3	95.9	102.5	93.6	101.8
D3ZFB2	90.5	115.6	100.6	97.5	93	83.4	99.6	108.1
D3ZFC5	103.4	91.3	103	103.6	102.9	96.7	97.8	104.9
D3ZFE9	103.5	99.4	100.4	105.1	103.6	98.2	94.3	92.3
D3ZFF4	96.6	103.9	104.5	103.3	99.2	95.1	99.6	99.9
D3ZFH5	92	102.3	97.6	96.2	93.4	98.7	109.2	108.4
D3ZFJ3	96.2	103.9	103.8	103.4	93.2	82.6	106.2	108.4
D3ZFJ6	91.5	89.5	112.4	99	108.5	108	100.5	95.5
D3ZFK5	83.9	114.1	109.9	102.3	97.7	108.8	94.1	101.1
D3ZFK8	98.2	103.5	112.9	104.9	87.4	93.6	95.2	93.7
D3ZFN9	89	81.9	88.8	98.3	83.5	76	109.4	124.5
D3ZFP4
D3ZFQ3	93.1	98.6	96.1	94.8	90.2	94	109.1	106.2
D3ZFQ8	102.2	106.8	95.5	101.8	93.3	97.7	95.8	104.5
D3ZFR9	106.6	100.1	92.3	104.2	83.7	84.9	95.4	105.7
D3ZFS7	96.2	99	67.5	96.7	109.4	98.6	87.5	144.6
D3ZFT1	92.9	88.7	94.5	105.9	91.4	94.2	95.3	97.4
D3ZFU9	98.7	97.4	102	102.6	92.3	98.9	103.1	101
D3ZFX4	100.2	106.2	99.9	96.2	95.9	96.6	107.6	101.6
D3ZFY0	95	107	104.3	99.8	103.9	100.3	91.1	96.9
D3ZFY8	98.3	89.6	98.7	97.7	103.7	102.9	102.2	94.9
D3ZG07	87.5	100.9	102.2	111.5	85.2	90.9	95.3	103.5
D3ZG43	106.6	124.9	96.7	104.6	106.8	101.1	90.3	92.9
D3ZG78	100.7	96.1	97.7	99.4	92.2	95.4	103.5	103.6
D3ZG83
D3ZG88	141.4	95.2	87	98.1	83.2	76.2	106	112.1
D3ZGA5
D3ZGE6	107.1	93.4	94.9	108	102.6	93	98.8	104.4
D3ZGJ0	119.2	113.9	97.7	95.2	89.8	85.7	87.4	94.8
D3ZGL1	91.2	97.5	134.4	140.3	71.2	71.1	93.7	98
D3ZGL5	104.6	103.2	105.8	100.9	96.4	92.3	100.3	108.8
D3ZGL6	94.3	123.9	135.5	88.1	82.8	94.3	81.3	94.1
D3ZGM5
D3ZGQ2
D3ZGQ8	94.5	96.3	123.9	117.1	81.4	83.1	116.7	96.6
D3ZGR7	118.8	98	108.2	93.7	82.8	79.7	89.1	89.6
D3ZGS5
D3ZGW2	90	86.7	137.6	101.4	104	93.5	102.5	91.3
D3ZGY1	112.3	100.6	95.2	93.9	83.9	79.7	98.5	101.1
D3ZGY2	107.4	90.2	83	90.3	97.4	91.6	104.1	103.8
D3ZGZ9
D3ZH12	97.9	93.1	87.9	108	90.5	107	91.5	113
D3ZH14	92.1	96	102.5	152.3	90.3	89.6	99.1	88.2
D3ZH23	124.3	126.3	87.6	105.5	91.1	92.2	96.9	113.5
D3ZH30	95.1	86.2	100.8	93.2	91.7	87.4	113.5	109.9
D3ZH41	83.7	88.1	119.8	108.8	74.2	89.5	95.2	94.4
D3ZH46	90.8	115	100.2	97.2	83.4	88.9	90.8	94.3
D3ZH66	118.2	110	103.3	104	83.2	91.7	95.6	101.4
D3ZH75	100.1	100.2	100.7	106.6	99.4	99.8	107.8	109.4
D3ZHA0
D3ZHB5	101.6	80.4	100.6	89.2	105.4	98	110.5	104.5
D3ZHB7	111.7	90.5	94.9	99.5	85.9	99.3	101	100.9
D3ZHC4	90.2	86	108.5	103.8	83.7	84.2	97.6	85.1
D3ZHD1	89	84.1	119.9	89.8	94.1	97.2	103.1	103
D3ZHD3	106.2	114.1	104.6	102.4	97	110.3	95.7	103.8
D3ZHF8
D3ZHG0	78.7	100.4	112.2	109.9	97.6	98.4	96.5	108
D3ZHI6	91.6	72.7	123.5	91.2	93.7	96	101.6	88.3
D3ZHK4
D3ZHM7
D3ZHP7	107.7	103	97.2	98.9	92.8	92.3	103.6	94.6
D3ZHQ1	109.3	92.5	91.9	100.5	91.3	89.6	98.2	97.2
D3ZHR2	108.6	97.9	87.3	96.7	90.4	92.2	96.5	106
D3ZHS3
D3ZHS5
D3ZHV3	52	45.2	163.7	117.5	92.4	49.4	171.5	81.9
D3ZHV7	118.1	96.4	92.7	104.3	99.9	82.7	92.4	98
D3ZHW0	91.1	94.7	110.6	110.6	95.3	91.7	95.9	89.7
D3ZHZ3	102.5	92.5	105.5	110.7	98.3	92.8	92.2	89.4
D3ZI07	126.8	112.7	106.7	103.4	81.2	73.6	94.9	97.1
D3ZI16	96.7	89.9	102.4	96.3	101.1	104.6	98.9	96.6
D3ZI42	84.5	86.1	83.4	147.6	86	86.9	83.1	99
D3ZI68	98.8	93.6	93.8	98.9	101.1	97.1	90.2	102.8
D3ZIC2	102.5	102.5	95.6	98	98	95.9	99.7	103.5
D3ZIE4
D3ZIH4	116.5	107	100.2	101.3	83.5	81.9	89.3	92.5
D3ZIK0	141.3	107.2	79.2	105.9	77.3	70.8	101.9	112.6
D3ZIL6	107.4	116.9	92	96.3	91.2	90.9	99.4	104.1
D3ZIM7
D3ZIN7	95.1	119.5	104.6	104.6	97.5	93.7	93.1	97.1
D3ZIQ1	99.1	109.2	102.6	118.3	113.9	96.5	95	97.8
D3ZIS5
D3ZIU2	62.7	139.8	83.9	226	67.3	98.1	74.8	99
D3ZIV3	106	96	106	95.9	92.9	89.8	104.1	99.9
D3ZIV8	111.9	87	97.8	116	97.1	92.6	97	104.7
D3ZIW4	98.9	105.7	114.2	102.4	126.6	114.6	107.3	95.9
D3ZIX4
D3ZIY3	84.1	107	102.9	107.5	113.7	102.4	101.6	100.4
D3ZJ01
D3ZJ08	154	73.2	125.1	111.4	97.3	139.7	95	96.1
D3ZJ32	85	99	95.9	75.9	73.6	78.5	74.5	84.5
D3ZJ50	98.2	94.9	110.1	105.1	90.6	80.3	103.6	98.2
D3ZJ91	101.1	94.7	93.3	100.8	102.4	92.6	98.1	85.4
D3ZJ92	102.7	95.9	106.9	99.3	94.5	93.8	98.8	101.4
D3ZJA4	71.3	76.5	93.4	81.9	60.9	58	205.4	74.9
D3ZJB7	95.2	81	73.6	125.6	60.3	59.6	116	129.6
D3ZJB8	102	92.2	97.4	99.7	89.3	79.7	90.4	101.1
D3ZJD3	78.5	95	105.8	110	100.5	115.3	104.2	106.8
D3ZJF8	74.2	72.6	96.9	129.7	103.4	124	115.8	123.9
D3ZJF9	119.4	112.2	109.3	90.5	85	82.8	97.5	109.2
D3ZJG4	106.7	59.6	105.3	91.7	101.7	87.9	94.3	75.1
D3ZJN9	140.8	84.6	79.1	83.3	81.5	84.1	89.3	89.8
D3ZJR1	102.2	99	107	101.6	97.6	93.7	97.8	98.2
D3ZJR7	88.7	106.3	93.8	113.8	93.3	89.8	101.7	110.3
D3ZJX5	104.8	99.5	95.9	97.2	94.8	94.9	105.2	102.4
D3ZJY1	102.6	96.4	112	97.3	108.5	102.3	90.9	87.1
D3ZJZ0	93.8	82.3	93.5	113	107.7	103.7	102.8	105.6
D3ZK56	93.7	114.2	118.1	109.6	82.7	78.7	85.6	91.9
D3ZK73	96.1	84.3	86.6	91.9	91	89.9	100.9	100.6
D3ZK76	96.8	91.1	96.6	108.1	114.5	111.7	115.3	93.7
D3ZK97	86.4	97.8	115.2	99	95.8	97.3	102.8	93
D3ZKC6	105.3	112.7	99.6	95.5	90.7	102.5	104	103.6
D3ZKD3	101.4	98.5	96.6	82.7	107.6	83.6	110.3	108.9
D3ZKE1	80	101.9	106.7	99	101.6	97.8	94.3	84.1
D3ZKE6	95.8	101.5	114.7	103.6	99.2	98.9	99.6	101
D3ZKG1	107.8	104.2	97.7	95.3	96.6	96.5	98.2	102.3
D3ZKG5	104.3	108.4	100.6	96	93.6	87.2	88.6	96.2
D3ZKG7	107.9	90.9	108.6	104.4	98.7	99.7	105.8	94.6
D3ZKH6	117.3	94.3	117.9	87.2	75.9	69.1	90.3	100.1
D3ZKI3
D3ZKJ8
D3ZKK3
D3ZKN4
D3ZKP9	93.3	159.1	108.3	98.1	73.6	83.1	101.6	92
D3ZKQ0	91	98.4	103.4	103.5	106.9	91.5	114.8	98.3
D3ZKR9	101.9	106	96.1	97.2	90.7	92.7	103.5	97.2
D3ZKT0	98.5	87.1	93	94.3	97.8	99.6	99.7	97.6
D3ZKT8	89.7	87	100.8	98.8	117.3	110.2	115.5	97.3
D3ZKU7	118.9	108.4	101.4	108.1	86.5	87.2	97.7	97.7
D3ZKV7
D3ZKX1	139	94.2	91.9	100.2	84.7	89.2	104.3	107.3
D3ZL10	101.1	89.9	97.5	112.7	106.2	78.6	94.8	100.6
D3ZL11
D3ZL21	101.7	109.7	110.5	98.3	95.8	98	100.7	103.8
D3ZL50	98.4	97	101.3	97	94.9	94.5	96.5	99.3
D3ZL85	105.2	97.9	99.8	106.3	114.9	99.1	90.7	96.5
D3ZL95	115.2	118.6	93.3	94.6	85.5	84.8	100.8	97.5
D3ZLA3	97.1	97.1	97.5	98.5	104.3	105.2	106.6	105.7
D3ZLC1	110.6	104.9	110.4	96.2	93.7	92.6	100.6	96
D3ZLC3	89.7	108.4	148.5	103.1	103.9	108.3	89.4	87
D3ZLD5	97.3	100.9	98.2	89.5	87	89.2	93.4	98.5
D3ZLE2	102.1	100.1	89.3	113.9	87.6	93.7	93.2	91.3
D3ZLH8	113.1	98.1	92	97.3	97.2	94	100.4	91.5
D3ZLK9	105.2	95.4	96.8	99.3	105.5	101.2	99.4	99.9
D3ZLM5	97.3	92.8	101.3	91.8	98.4	94.8	97.3	98.7
D3ZLN7	96.4	183.2	117.9	93.2	75	73.2	75.5	84.1
D3ZLR6	84	90.5	87.2	93.1	125.5	99.8	123.3	102.3
D3ZLS5	105.3	94.7	95.1	95.9	92.5	94.1	110.5	107.7
D3ZLT1	116.9	100.3	95.5	100.9	96.5	90.4	100.4	111
D3ZLX2	106.7	101.6	103.9	99.3	92.3	96.4	86.8	108
D3ZLX3	101	102	106.2	110.6	101	104.2	100.5	103.5
D3ZLY9	94.5	96.8	117.1	97.9	98.9	97.7	98.6	102.1
D3ZM03	83.3	84.2	77.9	100.9	99.4	109.1	116.7	106.9
D3ZM07	96.8	118.9	149.5	125.5	112.2	105.7	92.5	86.8
D3ZM09	110.8	106.3	96.2	101.5	90.7	84.8	92.2	89.2
D3ZM20	99.7	109.9	106	97.5	97.5	99.2	100.8	103.6
D3ZM21	84.2	82.6	148.4	82.9	116.5	99.6	112.8	99.6
D3ZM33	97.1	102	101.3	105.1	105.7	106.7	101.4	100.1
D3ZM54	94.6	141.8	78.9	83.7	78.5	75.1	100.2	111.7
D3ZM69	84.2	102.4	95.7	141.1	87.3	93.3	100.2	97.6
D3ZME7	106	93.5	94.7	95.4	99.4	92.9	100.4	96.3
D3ZMI8	87.9	111.4	114	104.3	102.6	101.4	93.6	97.3
D3ZML4	97.3	94.4	98.6	117	92	101.6	113.9	117.9
D3ZMP6
D3ZMR2
D3ZMR9	122.3	104.3	91.2	96	85.6	84.2	93	95.1
D3ZMS0	91	90.5	107.2	110.8	106.2	105.7	111.7	85.4
D3ZMS1	100.9	105.1	106.8	100.8	98.1	96.3	98.5	94
D3ZMS4
D3ZMS7	103.2	86	104.1	90.9	106.9	77.2	110.4	104.7
D3ZMW3	91.9	92.4	109.4	97.9	89	90.3	101.7	103.9
D3ZMX6	102.2	98.8	108.1	97.9	93.8	90.3	109.4	99.5
D3ZMY7	100.2	92.8	104	89.7	102.1	92.1	98.9	97.4
D3ZMZ9
D3ZN27	104.2	92.8	100.9	97.3	100.8	95.1	104.1	101.5
D3ZN38	121.7	112.8	91.9	104.2	101.4	94.3	104.4	92.6
D3ZN39	97.7	108	100.6	94.2	107.3	104	102.3	94.3
D3ZN43
D3ZN51	105.6	99.6	107.5	119.2	78.4	88.5	97.3	105.4
D3ZN76	112.6	97.3	94.8	102.5	97.8	90.3	99.7	97.5
D3ZN95	106.6	103	98.3	105.2	97.3	93.7	92.6	102.5
D3ZND9	105.6	98.1	87.8	109.2	113.1	107.6	100.2	94.6
D3ZNF4	92.5	80.4	103.1	89.8	98.7	103.8	97.5	93.4
D3ZNI3	105.3	100.1	91.8	102	84.6	85.1	104.8	115
D3ZNJ5	90	82.2	125	101.2	144.5	103.6	83.6	92.7
D3ZNK1
D3ZNQ6	106.5	113.7	90.2	97	97.2	95.1	99.5	100.1
D3ZNS8	111.9	92.7	99	101.3	97.8	99.9	99.6	89.6
D3ZNV6	76.5	76.4	85.5	75.3	106.1	88	180.8	73.8
D3ZNY3	109.1	97.6	100.6	95.3	89.5	91	101.5	107.1
D3ZP47	100.7	93.9	101.9	91.1	97.4	99.4	104.2	100.1
D3ZP96	87.3	108.7	112.6	115.5	92.3	100.6	107	100.1
D3ZPA1	119.8	100.2	87.4	101.1	93.3	86.7	100	98.5
D3ZPB8	93.1	103.2	117.3	106.2	85.3	103.5	83.2	97.7
D3ZPD8	100.2	90	83.3	95.9	99.9	92	97.9	102.3
D3ZPE5	102	103.4	92.3	99.8	91.5	93.5	100.1	107.2
D3ZPF0
D3ZPF2	107.3	105	97.6	99.4	102.4	100.7	97.2	103.7
D3ZPI8	106.6	101.9	131.2	94.2	97.6	89.9	90.3	83.9
D3ZPJ0
D3ZPJ9	104.1	92.2	92.4	93.5	85.5	82	100.4	105.4
D3ZPL1	95.4	101.4	106.9	114.8	98.3	92.3	100.8	98.8
D3ZPL2	68.1	129.6	88.4	90	105.8	81.7	132.2	154.8
D3ZPN3
D3ZPN5
D3ZPP2	109.8	97.3	117	94.7	85.3	91.7	97.5	93.7
D3ZPQ4	107.5	78.9	93.5	106.6	102.8	100.7	121.2	85.6
D3ZPR0	100.6	92.1	93.6	106.8	95.6	96.9	102.1	98.2
D3ZPV2
D3ZPV8	116.9	99.3	93.3	96.1	94.4	98	102.3	96
D3ZPW7	109.2	96.5	91.6	113.4	92.8	88.6	98	96.4
D3ZPY0	122.5	72.8	106.5	118.6	123.5	83.5	122.7	133.6
D3ZPY2
D3ZQ02
D3ZQ09	108.2	102.5	88.7	86.3	103.4	94.5	81.6	80.4
D3ZQ25	115.7	81.8	98	102.8	91.2	98	106.7	117.1
D3ZQ26
D3ZQ57	103.5	93	97.8	98	98.9	92.7	101.8	105.6
D3ZQ59	89.6	90.8	99.7	100.5	95.6	101.6	103.6	96.7
D3ZQ63	113.5	131.5	97.6	114.2	98.8	83.8	95.2	100
D3ZQ74	107.7	89.2	115	103.4	104	95	98.4	114.1
D3ZQ77	95.8	128.9	102.3	101.4	98.8	111.9	95.3	99.2
D3ZQ80
D3ZQ91	100.3	114.3	103.2	100.2	98.4	104	105.2	96.1
D3ZQB6	105.9	102.8	105.9	100.4	98.2	98.3	92.1	93.2
D3ZQE8
D3ZQG0
D3ZQI0	55.1	109	103.1	216.8	93.2	77.2	65.5	82.2
D3ZQI4	106.2	80	94.3	102.5	99.9	94.9	101.2	101
D3ZQI6	94.4	106.3	106.1	92.6	83.6	82	103.9	121.9
D3ZQJ2	87.6	83.1	84.5	93.8	105.2	98.1	107.8	105.2
D3ZQJ3	112.9	86.5	149.4	136.3	89.2	119.1	167.5	139.1
D3ZQL1	96.8	96	103.1	99.1	102.3	107.2	98.2	98.4
D3ZQM0	95.3	89.9	101.5	101.1	88.8	89.4	94.4	96.8
D3ZQM7	159.2	87.8	92.5	88.7	75.1	61.8	75.4	81.5
D3ZQN6	120.2	108.6	75.5	105.9	80.6	60.7	112.3	84.7
D3ZQN7
D3ZQW1
D3ZR26	96.7	103	87.3	92.6	94.2	93.9	108.9	102
D3ZR49	106.7	84.5	80	96.3	91.1	84.7	99.3	100.5
D3ZR64
D3ZR79	104.3	94.7	101.3	108.4	99.6	93.2	102.4	99.9
D3ZRB3
D3ZRC4	105.7	86	83.7	92.7	95.8	93.8	103.7	100
D3ZRE3	93.6	89.1	129.5	85.3	105.9	99.4	94.6	89.4
D3ZRE6
D3ZRE7	97.6	95.5	111.2	106.6	96.2	95.1	103.6	100.4
D3ZRG7	95.4	91.6	124.3	96.9	94.6	96.4	101.3	98.9
D3ZRH1	100.3	122.6	118.5	108.7	90.9	88.8	94.5	100.9
D3ZRI6	172.8	100.5	173	103.1	79.8	74.6	62.6	73.7
D3ZRK0	101.8	98.8	132.8	100	82.8	77.4	95.3	90.2
D3ZRL3
D3ZRM5	127.8	101.8	94.8	85.3	74.9	67	88.5	106.9
D3ZRM9	83.2	92.3	110.6	112.4	100.5	106.4	104.3	102.6
D3ZRN5	112.7	94.2	102.3	96.1	89.5	84.4	98	96.9
D3ZRW8	110.2	83.7	98.2	92.9	103.3	99.6	100.3	97.8
D3ZRX9	83.8	82.7	80.2	196.2	84	86.8	91.6	89.5
D3ZRZ9
D3ZS52	86.7	119.2	92.6	97.3	90	94.9	99.4	127.4
D3ZS58	99.3	105.8	92.6	105.4	97.7	95.9	94.9	98.5
D3ZS74
D3ZS75	155.3	171.3	107.7	81.3	122.3	110.6	83.1	87.8
D3ZS88	98.7	76	86.8	82.7	112.7	182.3	67	97.2
D3ZS92
D3ZS99
D3ZSA9	100.1	94.8	106.9	102.1	102.9	95.3	100.9	104.8
D3ZSC2
D3ZSD8	101.6	98	104.2	102.9	83.4	98.1	99.9	105.2
D3ZSF3	98.3	83.4	101	95.6	103.3	102	89.8	99.2
D3ZSK3
D3ZSM9
D3ZSN4	106.4	107	104.1	119.4	107.5	105.5	120.3	108.3
D3ZSN7	120.1	129.6	81.6	97	83.1	88.4	99.6	104.4
D3ZSP1
D3ZSU7	86.2	127.6	108	105.6	98.7	93.8	98	112.4
D3ZSV1	99.1	111.7	81.2	93.7	83.4	100.2	93.8	115.3
D3ZSV7	104	124.2	93.4	101.3	88	89.6	90.8	109.2
D3ZSW5
D3ZSY4	112.9	95	77.9	81.1	97.1	84.8	104.2	88.8
D3ZSY8
D3ZT01	122.2	93.6	101.1	114	89.2	89.8	89	89.5
D3ZT03	99.4	98.4	96.7	108	101.4	96.7	94.9	100.9
D3ZT51
D3ZT52	107.4	88.6	102.7	96.3	87.9	90.3	80.2	90.4
D3ZT62
D3ZT64	87.1	102.3	110.8	98	86.4	74.3	88.7	90.6
D3ZT71	102.3	96.4	95.6	100.3	96.2	98.5	98.2	96
D3ZT90	97.6	88	96.5	107.6	103.6	118.9	94.7	98.2
D3ZT98	96.8	95.8	90.4	107.9	106.3	107.6	100.5	101.9
D3ZTB5	102	95.9	117.6	100.7	88.9	97	104.9	111.7
D3ZTF1	107.5	102.3	102.7	102.4	97.5	90	99	98.8
D3ZTF6	106	100	97.7	86.9	76.2	80.8	98.9	91.4
D3ZTG2
D3ZTH8	88.2	94.7	104.2	102.5	107.4	102.7	99.3	97.2
D3ZTL0	104.7	96.6	102.6	96.5	98.6	92.1	95	97.4
D3ZTM7
D3ZTN2	134.6	82	103.7	97	104.6	81.7	112.4	79.3
D3ZTP0	100.8	101	90.2	94.2	97.6	103.6	103.4	110.8
D3ZTR1
D3ZTR4	84.3	97.5	96.7	98.1	106.6	102.3	105	103.4
D3ZTR5	96.7	87.2	138.4	103.9	81.4	79.5	85	94.7
D3ZTT7	87.8	106.7	95.4	93.7	86.1	91.8	103.6	121.4
D3ZTW1
D3ZTW7
D3ZTW8	132.4	103.8	87.9	108.4	76.2	69.2	108.1	110
D3ZTW9	145.2	111.8	80.5	104.9	78.1	62	104.9	111.9
D3ZTX0	99.5	103.8	102.3	94.8	99.1	96.6	108.2	107.7
D3ZTY0	123.8	116.1	111.2	99.9	93	71.6	104.1	114.6
D3ZTY6	173.1	65.4	103.3	183.1	89.1	83.7	109.2	77.3
D3ZU00	128.4	115.5	83	105.3	98.9	99.3	88.2	81
D3ZU13	102.4	100	100.8	104.3	96.2	96.5	94.8	94.6
D3ZU22	80.6	101.4	98.5	112	93.8	103.7	107.3	113.6
D3ZU51
D3ZU57	102.4	97.8	116.7	105.7	95.8	105	106.9	96.5
D3ZU63	97.7	63	114.5	102.2	85.3	92.4	78.3	98.6
D3ZU64
D3ZU70
D3ZU83	99	94.1	98.1	93.7	92.2	92.4	106.1	95.8
D3ZUB0	87.5	89.2	131.8	113	92.2	97.6	106.3	95.2
D3ZUC2	103.2	108.8	113.7	104.3	95.2	92.8	101.4	95.1
D3ZUC9	133.7	105.8	113.8	93.7	85.2	76	92	91.7
D3ZUD8	99.6	99.2	105.1	106.5	89.4	94.1	102.9	102.6
D3ZUI1	106.7	86.8	81.7	113.1	98.9	93.5	98.7	115.3
D3ZUJ8	120.6	91.7	100.6	86.6	83.2	86.5	90.5	104.1
D3ZUK4	112.3	120	102.3	96	81.6	76.2	91.6	91.7
D3ZUL1	93.3	127.5	125	94.3	98	82.2	101.2	113.4
D3ZUL3	96.8	105.2	111.9	103.5	93.6	102.9	95.1	101.4
D3ZUL4	126.7	89.6	83.7	97.1	76.4	81.9	94.7	106.7
D3ZUL8	98.2	106.5	110.5	90.8	95.6	98.7	91.3	90.8
D3ZUM4	101.5	89.3	123.8	97.4	95.7	96.7	94.4	96
D3ZUP5	107.6	91.2	126.5	107.3	115.7	108.9	98.7	100.5
D3ZUP8	84.3	185.5	100.6	84.1	86.4	90.4	91	83.1
D3ZUQ2	110.6	111.3	92.2	115.2	105.5	98.2	93.7	101.1
D3ZUQ7
D3ZUU6
D3ZUU8	102.1	101.4	96.3	96.1	111.3	98.5	100.8	96.3
D3ZUV2	160.4	86.8	77.8	82	95.4	85.4	101.3	116.5
D3ZUV3	97.9	99.9	97.3	102.7	99.1	101.1	95.6	101.3
D3ZUV9
D3ZUX1	98	105.4	87.3	101	105.2	105.7	101.2	101.3
D3ZUX5	99.6	97.7	100.1	97.2	101.4	96	101.9	105.8
D3ZUX7	95.8	92	100.2	91.2	113	92.3	104.9	105
D3ZUY0
D3ZUY8	105.4	93.1	102.9	96.8	90.4	89.9	99.1	104.6
D3ZUZ4
D3ZV63	115.7	81.8	100.2	122.3	87.1	79.8	85.9	90.8
D3ZV75	126.8	88.4	110.2	113	93.4	96	111.4	92.1
D3ZV81
D3ZV82	88.5	100	116.5	111.2	91.2	86.8	107.7	96.3
D3ZV91	112	115.2	94.6	99	104.4	109.9	104.3	97.6
D3ZV96	115.2	118.7	89.5	91.9	84.9	83.5	89.2	100.3
D3ZVB7
D3ZVD8	106.5	97	100.7	102.3	102.9	102.6	100.3	108.6
D3ZVE5
D3ZVF4
D3ZVG1	105	124.4	91.5	92.8	85.6	88.6	95.4	106.2
D3ZVH0	96.1	115.1	83.5	82	94.8	89.6	106.4	131.8
D3ZVH6	118.4	110.1	99	92.2	79.4	86.1	111.1	118.6
D3ZVI9	111.5	110.8	92.6	101.8	89.2	85.4	100.6	106.6
D3ZVK3
D3ZVK5	93.4	105.8	109.1	95.3	96.2	104	101.7	104
D3ZVN7	120.2	76.4	82.3	88.3	86.8	90.8	84	83.2
D3ZVP6	110.5	100.2	103.5	98.4	89.2	91.7	108.6	105.9
D3ZVQ0	95.9	101.2	102	95.5	96.2	93.8	103.4	105
D3ZVQ8	85.7	84.2	90.2	90.8	105.2	97.5	123.8	114.3
D3ZVR7	90.5	110.9	96.6	111.2	101.8	91	97.4	96.1
D3ZVR9
D3ZVS2	105.6	97.7	104.6	106	98.7	98.4	94.7	99.6
D3ZVS5	94.4	98.9	96.3	96.2	94.7	104.5	114.6	107.7
D3ZVT2	123.8	104.3	102.7	100.3	88.2	86.8	74.9	85.6
D3ZVU4	113.1	103	98.6	100.6	99.5	97.6	97	95.5
D3ZVW3	70	88.4	88.7	86.3	85.6	119.5	92.8	103.6
D3ZW08	97.8	91.7	102.1	100.7	101.6	101.1	106.1	100.7
D3ZW15	108.6	96.9	97.9	98.6	98.8	98.2	100.6	104
D3ZW38	112.3	97.2	95.7	99.8	92.4	91.3	111.8	110.4
D3ZW55	97.9	99.1	97.9	93.7	98.4	99.3	99.3	101.3
D3ZW60
D3ZWA8	107.4	94.5	115.6	95.5	91.5	87.3	104.7	105.1
D3ZWB1	110.5	115.9	107.2	85.6	68.9	79.5	70.5	95.7
D3ZWC6
D3ZWD3	98.8	101.3	87.3	92.8	105	107.4	103	106.9
D3ZWD6	103.4	101.3	92	102.8	101.2	89.5	110	105.6
D3ZWE0
D3ZWG9	82.5	93.2	115.3	106	98.5	101.8	119	99.8
D3ZWH1	101.6	98.5	95.1	102.8	101.3	92.9	106.5	99.7
D3ZWL6
D3ZWL9	78.3	94.1	68.4	87.8	71.3	65.5	104.7	129.5
D3ZWN1	112.4	84.1	102.2	103.9	99.7	94.6	99.1	89.2
D3ZWP2
D3ZWP6
D3ZWQ8	77.4	80.6	172.4	118.1	71.4	67.2	85.9	88.8
D3ZWR1	77.9	91.9	108.4	99.3	106.1	91.3	101.7	123.2
D3ZWR3	92.1	138.2	140.2	133.5	84	78.1	76.9	81.1
D3ZWS0	90.8	94.8	96.5	86.8	80.9	90.7	90.2	106.6
D3ZWS2	110	102.6	81.4	92.8	88.9	86.6	98.1	95.1
D3ZWT2	130.1	106.7	118.1	121.9	103.2	112.1	106.6	106.6
D3ZWU1	111.4	92.7	97.6	89.6	86.2	85	94.6	93.3
D3ZWU9	143.4	86	111.3	88.1	90.1	90.2	89.4	85.8
D3ZWW0	192.6	64.4	67.3	87.7	66.6	58.8	90.2	82.4
D3ZWW5	86.7	96.3	89	94.8	93.2	87	87.3	89.3
D3ZX06	126.6	84.9	114.1	129.4	134.9	146.7	159.8	103.7
D3ZX08	105.2	80.6	97.2	102.4	88.4	93.8	83.5	79.2
D3ZX21	114.3	116.9	92.7	95.9	65.4	64.5	92.5	86.3
D3ZX38	108.9	82	102.2	98	104.4	98.8	119.1	95.4
D3ZX42	96.1	101.1	93.1	96.9	90.7	92.8	103.6	107.4
D3ZX46	79.3	77.3	97.3	96.3	108.5	108.7	111.5	103.3
D3ZX52	100.8	83.5	86.2	92.1	103.4	94.6	114.7	97
D3ZX87	92.1	119.3	107.2	102.6	93.2	103.7	94.7	98.7
D3ZXA6	107.7	96.8	101.8	111.1	93	92.7	108.7	109.3
D3ZXB9	113.1	116.4	96.8	102	91.6	85.7	99.1	101.7
D3ZXC8	85.6	99.2	104.1	93.2	98.6	96	99.1	110.1
D3ZXE2	97.1	94	141.7	93.4	91.8	93.9	99.6	100.6
D3ZXF8	116.1	106.9	107	96.6	99.4	93.1	90.2	88.5
D3ZXF9	104.5	106.6	114.5	98.8	112.6	101.6	93.1	91.5
D3ZXH7	105.3	117.2	106	99.8	101.7	99.8	92.1	97.4
D3ZXJ5	106.7	96.2	93.6	109.9	97.5	93.6	102	102.2
D3ZXK4	105	90.7	84.2	97.8	88.3	96.8	109.9	110.6
D3ZXK7	88.5	94.6	94.3	94.9	82.1	99.2	95	109.4
D3ZXL1	111.8	87.6	93	99.1	100.9	97	98.3	92.4
D3ZXL5	107.9	105.9	95.2	98.3	93.3	85.7	95.6	101.7
D3ZXP3	90.9	84.9	130.5	106.1	99.6	98.3	94.2	96.3
D3ZXQ0	91.3	101.1	84	90.7	116.5	100.7	104.3	138
D3ZXQ2	89	110.4	90.5	101.9	83.5	87.7	104.4	126.3
D3ZXS8	103.2	100.5	95.6	111.7	101.6	88.7	95.3	93.4
D3ZXY4	98.9	102.1	96.9	97.2	104.8	106.8	102.5	96.9
D3ZY16
D3ZY20
D3ZY44
D3ZY47	93.8	132.1	99.1	105.1	80.1	82.4	98	108.5
D3ZY50	102.6	105.9	97.2	100	96	101.7	98.8	112.8
D3ZY56
D3ZY68	110.7	118.6	132.5	108	96.2	88.3	84.7	95.5
D3ZY71	83.8	90.5	93.7	109.8	112.5	90.7	104.2	107
D3ZY91	110.7	86.2	84.5	102.9	66.2	61.8	187.6	117.2
D3ZY96	94.1	101.9	99.4	101.5	104.7	88.5	106.8	109.5
D3ZYE5
D3ZYG0	101.3	93.4	157.2	93.8	89.1	83.3	89.1	83.3
D3ZYK9	85.1	128.9	104.7	129.5	81	81.9	91	103.1
D3ZYL0	101.6	101.7	99.8	96.6	90	84.7	95.6	100.5
D3ZYL4	91.8	106	106.6	107.6	83	91.3	99.1	117.8
D3ZYM5	98.5	89.9	78.8	91.5	87.4	104	116.3	125.8
D3ZYM7	143.9	114.4	76.9	95.4	80.9	90.5	103.9	137.4
D3ZYQ3	100.9	89.2	85.5	97.9	83	127.7	111.7	104.1
D3ZYQ9	101.9	89.9	91.6	101.6	88	85.5	100.8	108.4
D3ZYR1	107.4	89	110.7	96.6	96.8	99.6	96	93
D3ZYS7	106.2	82.5	110.2	104.1	108.4	95.3	100.4	92.7
D3ZYT2	99.8	88.4	119.2	132.8	100.3	88.9	86.5	90.8
D3ZYU4	118.7	115.4	95.5	110.3	95.9	74.7	93.7	92.2
D3ZYW7	98.5	100.7	100.7	99.5	118.1	114.6	97.2	93.4
D3ZYY0	94.5	93	87.2	99.8	87.3	96.7	96.9	106.1
D3ZZ04	92.3	96.6	96.4	109.3	109.5	103.6	102.4	106.1
D3ZZ08	81.4	111.2	118.3	118.3	84.2	89.1	107.7	107
D3ZZ20	92.7	96.1	93.5	102.7	103	100.8	105.5	95.1
D3ZZ21	89.1	88.1	84.6	98.7	91.1	108.2	91.8	126.5
D3ZZ37
D3ZZ38	110.3	105.7	103.8	104	83.1	76.8	105.8	110.9
D3ZZ62	97.6	89.1	85.3	91.3	99.8	94.4	99.5	111.1
D3ZZ94	105.1	123.4	96.7	106.2	89.5	85.9	101.9	106.4
D3ZZ95	87.6	109.9	98.5	101.7	94.7	94.8	101.6	108.5
D3ZZA8	115.2	98.8	94.7	100.3	94.1	97.6	99.3	101.2
D3ZZB0
D3ZZB2	96.2	96	92.4	98.2	91.3	89.7	97.6	103.1
D3ZZC1	84.7	100.8	115.2	104.9	115.9	105.7	99	103.5
D3ZZC5	100.9	96.2	103.8	105.3	91.4	96.3	95.4	103.1
D3ZZE3	104.1	94.2	82.4	92.9	78.3	88.6	103.7	100.7
D3ZZG3
D3ZZH6
D3ZZJ4
D3ZZK1	108.5	100.4	103.6	100.2	98.6	100.4	94.1	104.8
D3ZZK8	82.1	89.9	104.7	92.5	105.8	101.4	96.8	101.4
D3ZZL3	94.7	99.7	94.7	88.6	86.3	82.9	110.2	119.3
D3ZZM0	91.9	75.3	87.3	100.7	106.2	85.9	119	109.7
D3ZZM3	101.8	106	94.8	105.1	88	85.5	96.7	110
D3ZZN4	88.1	100.9	111.8	106.4	101.5	103.8	100.9	95.3
D3ZZQ4	96.6	98.9	99.6	102.5	95.8	90	109.7	110.4
D3ZZQ6	129.5	99.1	98.7	100.4	77.4	77.1	95	102
D3ZZR5	102.2	96	106.8	99.1	99.8	96.4	96.2	95
D3ZZR9	94.5	102.2	95.5	98.5	110.8	99.4	100.8	100.5
D3ZZT9	80.5	88.4	135.3	109.8	76.6	97.5	123.6	94.2
D3ZZU4	93.6	130.5	99.1	106.9	101.4	105.5	94.1	110.2
D3ZZV1	96.9	100.2	88.5	97.8	102.7	103.8	107.6	108.4
D3ZZW1	98.4	109	110	97.5	87.4	95.6	109	112.3
D3ZZX4	133.3	121.3	104	97	78.2	81.4	96.2	84.1
D3ZZY2
D3ZZZ9	101.7	104.8	105.3	106	94	90.9	101.4	99.9
D4A020	69.1	81.6	98.6	96.9	93.3	115.8	134.7	130.9
D4A022	108.5	91.9	92.5	101.1	96.2	95.2	104.4	100
D4A031	98.1	110.7	109.7	93.7	92.9	95.2	91.9	84.8
D4A040	117.5	105	155.8	82.6	99.5	67.9	79.1	82.3
D4A053	110.3	98.5	124.3	84.5	85.8	77.4	114.8	76.4
D4A099	97.7	90.3	142	91.2	101.4	88.8	94.1	87.5
D4A0D9
D4A0E8	112.4	97.5	100.1	105.6	92	93	106.4	106
D4A0F5	95.1	97.4	109	104.8	100.6	103.9	98.8	99.3
D4A0L1	104.7	85.3	106.5	100.5	100.5	101.7	106.4	99.2
D4A0T0	97.7	105.8	94.3	97.7	97.4	96.5	89.2	90.5
D4A0T8	87.7	117.9	92.4	95.8	79.9	85.6	96.4	98.4
D4A0T9
D4A0U3	80.4	94.1	85.8	108.7	82.6	95.6	79.8	94.9
D4A0U9	79.6	91.6	84.6	90	90.4	93	103.2	109.7
D4A0W1	99.2	112.6	93.5	97.7	96.5	103.1	109.8	116.3
D4A0W7	100.3	95.4	90.7	98.4	97.4	95	95.7	96.4
D4A0Y4	110.3	94.2	91.6	96.2	95.2	98.6	97.6	103.8
D4A104	97.7	103.1	107.4	116.4	94.9	93.3	104.8	98.3
D4A106
D4A110	123.6	91.1	97.5	100.2	81.8	81.4	102.6	104.2
D4A131	120.3	119.2	97.4	100.3	90.2	90.8	91.3	95.2
D4A132	94.7	92.9	100.5	99.3	103.5	102.3	96.7	103.4
[truncated: 3,924 more rows]
