# Supplementary material for: Studying the effects of sea cucumber ovum powder on nonalcoholic fatty liver disease by proteomics techniques in a rat model
Source: Royal Society of Chemistry journal article supplement (doi:10.1039/d0fo00741b), 2020-01-01
Supplement: d0fo00741b2.xlsx [file d0fo00741b2.xlsx]

## Sheet: Sheet1
Table S2 Significantly different proteins among all four groups.
Uniprot ID	BCG-1	BCG-2	MCG-1	MCG-2	LDG-1	LDG-2	HDG-1	HDG-2
A0A023IKJ0	98.9	98.2	113.3	113.6	90.1	83.5	95.4	95.6
A0A096MJ11	107.5	104	98.7	102.8	88.3	92.4	104.5	103.4
A0A096MK30	90.5	93.6	127.2	118.6	90.7	91.8	99	95.2
A0A096MKB0	108.9	98	88.2	91	102.1	101.9	101.7	100.3
A0A096MKH2	93.6	94.4	106.8	100.3	112.1	110	101.7	99.2
A0A0A0MY07	102.4	100.3	96.4	96.7	99.7	100.6	99.8	103.1
A0A0G2JSJ8	98.8	101.9	103.8	101.5	89.2	87.1	94.4	95.3
A0A0G2JSK5	90.4	94.1	99.5	100.8	101.6	97.3	102.5	101.6
A0A0G2JSK9	147.3	152.6	79.7	87.7	81.4	91.8	77.6	84.6
A0A0G2JSL0	96.2	91.4	95.7	96.4	105.4	106.9	104.9	95.9
A0A0G2JSN9	81.1	77.7	121.3	111.2	99.9	111.4	96.9	92.5
A0A0G2JSS1	114	108.8	93.1	107.6	84.5	81.7	93.7	98.9
A0A0G2JSV5	106.4	105.5	101.4	95.4	102.4	100.2	96.3	97.1
A0A0G2JSY3	107.5	111	95.5	99.2	101.7	98.7	95.2	95.4
A0A0G2JT33	99.9	105.1	122	117.2	80.5	83	96.2	96.6
A0A0G2JT43	97.2	88	112.6	107.9	122.7	125	90.4	81.6
A0A0G2JT98	82.9	76	112.3	97.6	139.4	132.7	91.5	93.9
A0A0G2JTA0	88.1	84.2	95.3	96.9	110.4	110.2	113	104.8
A0A0G2JTX7	107.1	107.8	103.7	104.3	84.6	89.7	95.9	98.5
A0A0G2JTY2	63.5	81.4	121.3	144.3	80.1	87.7	92.3	98.8
A0A0G2JTZ2	87.1	85.7	81.5	90.9	123.3	115.3	87.5	90
A0A0G2JU05	120.2	104.9	91.4	93	92.8	96.1	94.5	98.7
A0A0G2JU77	109	105	95.8	99.5	91.2	94.1	96.2	101
A0A0G2JUB0	128.6	146.9	80.8	90.1	66.8	69.9	99.3	146
A0A0G2JUC7	98	98.5	108.6	111.4	97.2	98.7	101.4	99.7
A0A0G2JV51	127	166.1	121.5	124.8	84.9	79.7	93	97.2
A0A0G2JVB6	94.9	93.9	101	99.6	96.3	94.8	104.1	99.8
A0A0G2JVC8	119.5	110.8	89.7	86.7	84.6	82.5	104.7	101.5
A0A0G2JVG3	62.2	69.6	176.9	114.3	90.7	94.9	122.8	103
A0A0G2JVH4	95.6	91.3	102.3	105.4	103.6	99.9	97	99.7
A0A0G2JVM3	120	132.9	94.9	91.7	84.3	95.5	93.6	104.2
A0A0G2JVW5	112.6	99.1	111.8	110.4	84	76.6	88.5	92.4
A0A0G2JW14	99.9	101.4	109.9	101.2	81.8	79.7	100.3	98.6
A0A0G2JW85	109.8	102.2	119.2	103.4	83	85.6	90	93.5
A0A0G2JXD5	124.1	121.6	105.5	108.7	86.7	100.2	83.9	92.5
A0A0G2JXJ9	72.3	70.6	84.4	100.4	119	97.3	117.6	127.8
A0A0G2JXT3	156	184.9	74.7	82.5	68.8	72.8	84.2	76.9
A0A0G2JXT8	95.5	94.7	100.5	99.4	99.3	101.2	103.8	100.7
A0A0G2JY73	108.4	111.4	97.3	99.5	80.3	88.1	101.4	103.6
A0A0G2JYQ3	116.5	106.1	115	117.3	95.3	94.4	100.3	104.9
A0A0G2JZ53	95.8	91.6	104.4	105.5	102	97.9	99.5	97.1
A0A0G2JZ87	119.4	139.6	114.1	104.3	84	87.7	83.3	79.6
A0A0G2JZD1	136.3	130.8	139.6	122.2	71.8	71.5	80	87.7
A0A0G2JZE8	118.1	100.8	89	96.8	82.6	79	93.2	97.3
A0A0G2JZH8	112	106.2	93.6	99.7	103	103.9	94.6	93.4
A0A0G2JZR1	136.7	119	72.7	94.4	62	56.9	99.7	115.2
A0A0G2JZV8	113.7	103.6	112.3	101.3	91.8	89.3	89.5	92.8
A0A0G2K098	114.6	112	113.9	108.1	86.1	88.7	90.4	81.1
A0A0G2K0A0	108	96.1	111.3	107.7	79.1	78	106.3	93.2
A0A0G2K0B0	96.4	97.4	107.9	114.1	106	100.2	95.5	88.6
A0A0G2K0K6	85.6	100.2	153.8	144.4	74.9	89.7	80.3	83
A0A0G2K0N6	92.7	105.1	94.9	93.7	78	82.2	125.1	126.6
A0A0G2K0Z3	89.5	97.9	118.4	115.8	114.6	108.8	97.7	103.5
A0A0G2K110	85.4	83.3	90.2	103.3	98.8	96.5	107.3	105.9
A0A0G2K151	93.1	92.3	104.4	107.9	107.3	100.7	104	99.3
A0A0G2K1F2	148.2	182.9	85.5	78.2	74.3	72.3	88.2	85.7
A0A0G2K263	127	119.9	90.9	93.1	79.6	84.8	95.8	104.8
A0A0G2K273	101.2	98.9	107.4	101.9	90.1	92.6	102.5	102.6
A0A0G2K2V5	95.3	88.2	98.1	98	96.8	100.4	112.6	109.1
A0A0G2K3B2	114.2	113.7	96.9	104.5	92.5	92.4	98.4	97.9
A0A0G2K3H5	93	95.2	99.6	94.3	88.9	92.8	112.5	116.2
A0A0G2K3L8	101.7	94.9	106.6	109.5	89	91.7	99.5	99.7
A0A0G2K3V4	127	135.8	98.4	99	77.9	78.9	88.5	94.2
A0A0G2K3Z9	96	93.9	101.3	98.4	105.7	102	97.5	97.6
A0A0G2K402	97.4	96.1	109.9	106	99.1	98	92	97.3
A0A0G2K435	102.4	105.1	103.9	101.4	94.1	92	97.5	97.1
A0A0G2K4F6	93.7	87.6	105.3	115.2	93.1	84.9	101.3	100.7
A0A0G2K5C5	95	95.6	99.3	100.5	109.6	105.9	99.1	100
A0A0G2K5F1	112.5	106.3	98.1	97.3	102.8	104.6	95.8	102.9
A0A0G2K5Q8	107.8	94.9	90.9	103.3	80.4	83.8	112.7	112.9
A0A0G2K5W6	112.9	99.1	107.4	114.4	91.7	88.9	91.6	92.2
A0A0G2K6A9	102.2	102.7	102.9	100.6	102.6	101.9	97.8	96.6
A0A0G2K6E3	102.9	94.5	115.4	127.6	85	86.4	100.3	89.3
A0A0G2K6E8	106.6	99.3	98.3	92.7	89.4	92.7	111.2	105.2
A0A0G2K6W2	157.2	127.4	75.7	99.2	57.8	62.1	92.1	111.5
A0A0G2K713	113.5	109.5	93.9	92	118.1	98.6	87.2	85.8
A0A0G2K756	110	111.6	93.5	91.7	89.6	83.6	101.4	103.4
A0A0G2K7G7	102.2	91.9	123.9	112.8	97.2	95.6	99.4	91.5
A0A0G2K7M2	89.2	95.2	79.6	89.7	75	78.1	101.5	116.1
A0A0G2K7N9	108.7	105.7	96	88.4	84.4	86.1	115.5	109.5
A0A0G2K7W6	94.2	95.8	97.6	94.5	94.2	97.7	111.9	108.7
A0A0G2K8C7	113.9	134.2	107.9	97.1	79	81.1	88.5	91
A0A0G2K8D1	98.1	94.4	95.5	97.4	95	90.4	108	106.5
A0A0G2K8T0	99.4	102.6	123.2	112.8	80.4	84.9	96	107.6
A0A0G2K8Z9	105	100	98.5	98.5	94	95.1	99.2	98.4
A0A0G2K948	107.6	117.7	97.5	104	85.5	83.3	97.5	105.5
A0A0G2K950	120.9	113.8	96	88.1	95.2	87.4	98.8	98.5
A0A0G2K9G3	113.1	127.8	94.9	91.5	95.2	102.2	93.6	98.2
A0A0G2K9Q8	91.8	88.4	102.8	101.1	105.6	102.3	93	93.6
A0A0G2K9R0	105.3	95	108.1	111.8	108.1	98.5	89.7	83.2
A0A0G2KA69	82.5	87	93.2	108.5	117.6	115.7	96	85.8
A0A0G2KA79	149.4	124.9	122.8	125.9	78.4	83.2	97.4	74.9
A0A0G2KAB3	84.6	78	73.2	89.2	84.6	79.1	108.2	123.8
A0A0G2KAM3	110	104.3	89.9	102.2	109.7	108.3	94.6	90.1
A0A0G2KB98	125	119.9	95.7	100.6	89.9	85.7	96.6	103
A0A0G2QC06	86	91.4	95.9	100.6	100.6	101.9	114	108.2
A0A0G2QC59	160.2	122.7	114.8	75.7	67.9	68.6	70.6	73.1
A0A0H2UH94	105.2	101.2	99.1	101.8	95.7	95.5	98	96.4
A0A0H2UHP1	70.1	75.7	112.9	101.5	136.9	110.5	109.5	99.5
A0A0H2UHP9	113.7	113.3	93.6	97.2	88.7	89.7	103.3	99.3
A0A0H2UHQ0	95.1	90.9	114.9	107.8	95.8	91.2	101.2	96.6
A0A0H2UI10	117.9	107.7	100.7	98.7	80.6	80.5	94.4	95.9
A0A0H2UI38	99.6	101.6	103.2	104.7	98.7	97.5	95.8	95.8
A0A140TA89	82	80.7	102.8	104.4	99.7	96.5	101.2	91.7
A0A140TAA4	99.5	94.9	99	99.6	103.9	103.3	101.1	94.7
A0A140TAE0	94.5	101	110.7	114.4	88.9	91.3	98.3	104.2
A0A140TAE6	85.7	89.1	98.1	105.5	112.8	112.5	103.9	111.5
A0A140TAG3	107.9	115.4	80.4	88.7	80.3	79.6	87.7	94.6
A0A140TAI1	112	114.6	100.5	98.5	96	99.6	94.7	96.1
A0A140UHX9	96.1	96.3	102.1	97.8	107.1	108.5	101.4	93.1
A0A1W2Q6F8	101.2	101.3	95.1	100	108	107.8	95.7	96.2
A0JPJ0	114.9	110.7	99.8	100.2	89.7	87.4	92.2	95.3
A7BFV9	103.7	101.4	97.8	99.4	93.2	94.4	99	101.5
A7XYB9	120.1	128.4	97.5	95.4	85.8	93	90	99.5
B0BMW0	100.5	102.8	108.7	106.4	92.4	94.2	95.7	100
B0BMY7	108.6	108.6	93.8	99.2	83	78.1	113.4	111.2
B0BMZ3	102.8	92.2	81.8	89.7	85.1	90	107.2	105.8
B0BN46	103.8	104	95.7	95.1	105.1	101	101.7	99
B0BN53	218.5	122.2	84.1	80.8	47	45.1	76.1	66.6
B0BN68	96.6	92.6	95.7	101.9	106.3	101.7	99.1	96.2
B0BN86	117.9	113.6	94.6	103.5	100	95.3	94.9	92.7
B0BNA9	120.9	128.8	120.1	132.4	99.7	117.1	85.2	82.3
B0BNB5	105.4	98.3	99.4	101.9	89.1	89.5	96.9	95.7
B0BNF9	102.9	101.5	99.5	101.5	111.7	110.4	94.6	90.9
B0BNM0	104.7	101.7	97.4	96.4	105.9	111.4	96	90.6
B0BNM1	94.3	94	101.8	94.8	108.7	104.6	102.8	97.1
B0BNM9	91.4	83.3	90.7	89.7	97.5	89.8	110.3	116
B0BNN4	79.1	83.2	117.6	104.7	92.6	98.5	113.2	105.6
B0K008	88.9	100.4	93.8	101.7	113.5	121	97.6	94.4
B0LT89	106.9	117.7	104.6	103.2	89.1	90.5	92	95.5
B1H264	83.2	92	116.3	109.3	119.2	120.5	102.3	97.3
B1WBQ5	89.7	94.7	116.4	114.5	88.8	89.9	92.1	92.2
B1WC06	134.7	110.9	98.3	93.7	76.8	76.5	99.6	107.7
B1WC11	139.1	128.6	72.3	91.8	80.1	85.1	84.7	88.5
B1WC61	102.6	98	97.9	102.4	104.4	106.2	95.7	95.9
B2GUX8	91	100.8	113.4	116.8	88.7	94.6	89.3	81.5
B2GUZ7	117.5	113.7	109.9	97.6	81.9	79.7	101.8	93.9
B2GV14	146.1	106.8	97.5	94.4	74	68	91.6	99
B2GV54	84.8	75.9	97.5	122	120.4	111.2	93.3	82.5
B2GV99	89.7	89.6	105.5	102.9	100.9	101.8	110.4	100
B2RYA6	107.6	111.8	104.3	110	96.3	100.3	93.6	90.4
B2RYB8	87	89.8	121.2	131.6	85.4	85.7	108.3	97.5
B2RYJ4	141	120.8	111.9	107.9	90.4	92.6	102.9	116.4
B2RYM3	93	96.9	91.7	93.6	89.4	94.7	110.9	110.6
B2RYN1	100.7	91	92.5	93	107.5	104.3	105.9	97.5
B2RYT9	92.9	91.3	108.3	117	107	114.8	85.1	85.8
B2RYX1	104	95.5	89.3	96.8	124.6	133	106.3	93.7
B2RZ27	92.7	80.3	113.4	116.2	93.6	96.3	97.5	95
B2RZ37	86.3	89.9	100.4	112.6	103.9	112.1	111.1	115
B2RZ96	101.6	101.9	91.3	87.3	87	86.8	109.6	100.6
B2RZ98	83.2	80.5	154.6	139	80.9	73.8	102.3	94.8
B2RZD5	90.5	76.8	116.5	119	105.2	102.8	97.1	96.7
B2RZD6	102.5	93.8	88.2	98.1	115.9	108.9	102.4	107.2
B3GNI6	98.5	93.4	100.6	95.8	88	87.4	99.2	100.8
B3GS92	99.2	99.5	103.1	103.8	113.6	112.6	110.6	101.3
B3VPA7	91.9	92.7	101.7	99.9	111.6	110.4	91.4	100.4
B4F767	105.4	98.7	97.8	99.4	85.1	88.8	95.8	97
B4F768	110.4	104.8	96.2	96	102.9	100.8	97.7	96.7
B4F7B2	99.1	107.1	99.2	102.4	76.1	74.8	129.7	120.6
B5DEJ5	98.7	93.9	97.8	97.9	100.1	100.9	105	100.7
B5DEN5	112.2	104.5	102.6	100.4	98.3	98.5	95.8	96.1
B5DEX4	86.4	87.8	112.9	100.1	99.2	101.6	108.2	104
B5DF93	150.4	101.5	98.1	111.3	65	64.1	64.6	70
B5DFC3	104.6	101.5	99.1	102.2	93	94.3	100.6	100.8
B5DFI7	110.8	115.9	96.1	95.6	86.4	89.6	100.1	101.7
B5DFN4	87.3	91.5	102	106	110.8	102.1	100.9	98.1
C6ZII9	132	155.6	79.3	86.6	84.1	98.2	93.6	82.7
D3KR63	115.4	105	81.1	82.1	66.3	61	112.2	152.8
D3Z890	118	119.6	123.1	157.7	70.9	82.3	66.1	76.5
D3Z8E6	107.9	113.9	123.5	107	85.5	87.9	94.5	91.5
D3Z8K5	104.2	102.6	93.8	95.1	87	92.5	106	109.7
D3Z8R4	90.6	93.4	103.2	100.7	103.2	99.2	98.1	95.3
D3Z9E1	86.6	76.4	126.3	111.2	90	94.5	106.2	102.6
D3Z9P1	82	79.2	101.2	100.4	111.9	125.1	106	98.7
D3Z9R8	99.5	94.6	94	97.4	103.9	110	102.4	105.7
D3Z9X5	71.5	85.1	108.9	106.1	104.5	114.9	108	104.5
D3ZA22	99.5	95.9	99.1	90.6	89.5	86.8	105.8	108
D3ZAF7	99.9	95.7	101.8	103.5	78.5	86.1	98.9	92.5
D3ZAW2	98.4	93.8	99.8	100.2	109.4	104.8	99.2	94.4
D3ZBP3	90.9	100.4	94.3	96	94.9	94.8	116.1	111.9
D3ZCS9	96.9	92.2	92.5	99.1	108.2	101.9	97.4	93.8
D3ZDB9	111.8	105.2	100.2	94.3	94.2	95	100	99.2
D3ZDR2	111.9	100.3	90.2	93.3	80.4	80.1	104.3	120.8
D3ZEE9	94.6	89.9	99.6	105.9	102.5	99.2	105.5	106.3
D3ZEH6	95.8	97	96.4	98.1	107.7	104.5	101.4	96.8
D3ZF39	99.8	122.7	97.1	101.3	63.5	51.9	116.1	126.6
D3ZF54	86.1	91.6	108.9	101.3	113	104.9	102.8	104.2
D3ZFE9	103.5	99.4	100.4	105.1	103.6	98.2	94.3	92.3
D3ZFJ6	91.5	89.5	112.4	99	108.5	108	100.5	95.5
D3ZFN9	89	81.9	88.8	98.3	83.5	76	109.4	124.5
D3ZGJ0	119.2	113.9	97.7	95.2	89.8	85.7	87.4	94.8
D3ZGL1	91.2	97.5	134.4	140.3	71.2	71.1	93.7	98
D3ZGQ8	94.5	96.3	123.9	117.1	81.4	83.1	116.7	96.6
D3ZGY1	112.3	100.6	95.2	93.9	83.9	79.7	98.5	101.1
D3ZH30	95.1	86.2	100.8	93.2	91.7	87.4	113.5	109.9
D3ZH66	118.2	110	103.3	104	83.2	91.7	95.6	101.4
D3ZHW0	91.1	94.7	110.6	110.6	95.3	91.7	95.9	89.7
D3ZI07	126.8	112.7	106.7	103.4	81.2	73.6	94.9	97.1
D3ZIH4	116.5	107	100.2	101.3	83.5	81.9	89.3	92.5
D3ZIL6	107.4	116.9	92	96.3	91.2	90.9	99.4	104.1
D3ZJF8	74.2	72.6	96.9	129.7	103.4	124	115.8	123.9
D3ZJX5	104.8	99.5	95.9	97.2	94.8	94.9	105.2	102.4
D3ZKG1	107.8	104.2	97.7	95.3	96.6	96.5	98.2	102.3
D3ZKT8	89.7	87	100.8	98.8	117.3	110.2	115.5	97.3
D3ZKU7	118.9	108.4	101.4	108.1	86.5	87.2	97.7	97.7
D3ZL95	115.2	118.6	93.3	94.6	85.5	84.8	100.8	97.5
D3ZLA3	97.1	97.1	97.5	98.5	104.3	105.2	106.6	105.7
D3ZLS5	105.3	94.7	95.1	95.9	92.5	94.1	110.5	107.7
D3ZM09	110.8	106.3	96.2	101.5	90.7	84.8	92.2	89.2
D3ZMR9	122.3	104.3	91.2	96	85.6	84.2	93	95.1
D3ZNI3	105.3	100.1	91.8	102	84.6	85.1	104.8	115
D3ZQ09	108.2	102.5	88.7	86.3	103.4	94.5	81.6	80.4
D3ZQB6	105.9	102.8	105.9	100.4	98.2	98.3	92.1	93.2
D3ZQJ2	87.6	83.1	84.5	93.8	105.2	98.1	107.8	105.2
D3ZQL1	96.8	96	103.1	99.1	102.3	107.2	98.2	98.4
D3ZQM0	95.3	89.9	101.5	101.1	88.8	89.4	94.4	96.8
D3ZRE7	97.6	95.5	111.2	106.6	96.2	95.1	103.6	100.4
D3ZRM9	83.2	92.3	110.6	112.4	100.5	106.4	104.3	102.6
D3ZS75	155.3	171.3	107.7	81.3	122.3	110.6	83.1	87.8
D3ZSN7	120.1	129.6	81.6	97	83.1	88.4	99.6	104.4
D3ZTH8	88.2	94.7	104.2	102.5	107.4	102.7	99.3	97.2
D3ZU13	102.4	100	100.8	104.3	96.2	96.5	94.8	94.6
D3ZUB0	87.5	89.2	131.8	113	92.2	97.6	106.3	95.2
D3ZUD8	99.6	99.2	105.1	106.5	89.4	94.1	102.9	102.6
D3ZUK4	112.3	120	102.3	96	81.6	76.2	91.6	91.7
D3ZV91	112	115.2	94.6	99	104.4	109.9	104.3	97.6
D3ZV96	115.2	118.7	89.5	91.9	84.9	83.5	89.2	100.3
D3ZVH6	118.4	110.1	99	92.2	79.4	86.1	111.1	118.6
D3ZVI9	111.5	110.8	92.6	101.8	89.2	85.4	100.6	106.6
D3ZVQ8	85.7	84.2	90.2	90.8	105.2	97.5	123.8	114.3
D3ZVT2	123.8	104.3	102.7	100.3	88.2	86.8	74.9	85.6
D3ZVU4	113.1	103	98.6	100.6	99.5	97.6	97	95.5
D3ZW08	97.8	91.7	102.1	100.7	101.6	101.1	106.1	100.7
D3ZWD3	98.8	101.3	87.3	92.8	105	107.4	103	106.9
D3ZWQ8	77.4	80.6	172.4	118.1	71.4	67.2	85.9	88.8
D3ZX21	114.3	116.9	92.7	95.9	65.4	64.5	92.5	86.3
D3ZX46	79.3	77.3	97.3	96.3	108.5	108.7	111.5	103.3
D3ZXB9	113.1	116.4	96.8	102	91.6	85.7	99.1	101.7
D3ZXF8	116.1	106.9	107	96.6	99.4	93.1	90.2	88.5
D3ZXY4	98.9	102.1	96.9	97.2	104.8	106.8	102.5	96.9
D3ZYT2	99.8	88.4	119.2	132.8	100.3	88.9	86.5	90.8
D3ZYW7	98.5	100.7	100.7	99.5	118.1	114.6	97.2	93.4
D3ZZ38	110.3	105.7	103.8	104	83.1	76.8	105.8	110.9
D3ZZL3	94.7	99.7	94.7	88.6	86.3	82.9	110.2	119.3
D3ZZQ4	96.6	98.9	99.6	102.5	95.8	90	109.7	110.4
D3ZZX4	133.3	121.3	104	97	78.2	81.4	96.2	84.1
D3ZZZ9	101.7	104.8	105.3	106	94	90.9	101.4	99.9
D4A020	69.1	81.6	98.6	96.9	93.3	115.8	134.7	130.9
D4A0F5	95.1	97.4	109	104.8	100.6	103.9	98.8	99.3
D4A131	120.3	119.2	97.4	100.3	90.2	90.8	91.3	95.2
D4A132	94.7	92.9	100.5	99.3	103.5	102.3	96.7	103.4
D4A147	79.4	88.5	90.6	86.6	112	102	98.4	104.6
D4A1B9	103.3	95.6	105.9	109.9	91.9	92.2	93.1	97.1
D4A1J6	115.5	102	103.3	99.8	91.6	89	94.2	90.4
D4A1V7	103.8	105.5	108.9	102.9	93.4	91.3	90.9	92.5
D4A206	108.1	97.4	95.5	93.6	90.9	86.5	106	105.7
D4A305	97.9	92.1	107.1	103.4	109.5	105.3	91.9	96.4
D4A3T3	93.4	87	109.4	106.7	109.9	102.6	94.8	89.8
D4A3T4	112.6	114.4	79.7	92.7	91	93.6	98.5	107.8
D4A3V2	99.3	104.1	99.3	98.3	105.4	103.8	92	87.8
D4A416	96	95.1	97	99.9	99.5	96.9	102.8	102.1
D4A456	186.7	137.6	67.3	98.2	55.9	54.4	77.1	101.9
D4A4K4	94.8	94.6	98.8	103.2	93.6	96.5	105.9	104.4
D4A4Q7	84.4	89.1	93.2	103.5	103.1	110	103.1	101.4
D4A533	92.9	94.6	92.3	95.5	98.6	93.3	107.9	103.5
D4A5L9	103.3	106.7	103	100.3	102.9	104.1	98.4	96
D4A5X1	110.1	107.9	105.3	93.8	81.8	83.9	105.6	110.1
D4A605	124.2	109.9	84	98.7	81.4	88.4	85.4	84.5
D4A626	123.3	114.8	89.4	99.1	89.5	85.7	94.4	99.4
D4A6C5	104.8	102.5	98.8	101.8	90.7	90.8	101.3	108
D4A6G2	117.8	109.7	100.1	108	79	80.4	95.9	95
D4A719	106.6	106.5	136.6	117.9	79.9	83.2	92	81.7
D4A769	129.8	138.5	74.6	97.7	80.6	65.9	98.8	107.1
D4A777	88.7	79.5	108.6	119.4	86.1	87.6	95.9	97.3
D4A781	92.8	92	110.3	102.4	97.9	98.7	105.2	104.7
D4A7F0	105.6	102.7	94	103.9	87.7	87.5	106.1	106.3
D4A7U6	109.3	116.8	90	103.1	82.6	75.2	108.1	108.2
D4A7X9	90	89.9	106.3	105.9	92.2	90.5	101.2	98.3
D4A7Z5	107.6	109.9	92	99.3	86.4	83.3	107.9	113.5
D4A817	105.4	101.3	103.7	98.7	90	87.1	112.8	106.2
D4A8L5	114.5	109.9	102.3	98.4	79.9	83.8	101.8	101.4
D4A8N1	100.8	94.1	91.3	91.6	95.1	96.4	106.5	109.1
D4A904	140.6	126.1	89.2	84	87.3	84.1	87.8	95.1
D4A913	134.9	100	105.4	116.4	43.8	43	104.2	84.3
D4AA14	93.2	93.1	93.5	95.7	104.5	98.8	111.3	104.3
D4AA35	155.8	122.1	61.5	81.1	55.8	51.3	84.9	124.6
D4AAV1	120.6	136.8	85.9	101.5	100.3	98.3	86.5	86
D4AAV9	115.2	118.3	105.4	100.1	82.9	87.2	98.9	101.4
D4ABD7	97.1	96.5	99.3	96.9	91.9	91.8	105.9	101.9
D4ABI7	110.3	103.6	89.4	90.7	89.8	94.1	102.1	103.3
D4ABS5	120.6	102.4	163.6	135.5	59.8	69.6	70.2	76
D4ABX9	116.3	105.4	90.4	95.9	86.5	86.1	105	102.8
D4AC38	104.8	128.6	98.7	85.7	63.2	68.2	85.1	89.7
D4ACA5	100.5	91.8	98.3	97.6	106.3	105.9	94.1	90.8
D4ACF2	107.1	93.8	116.4	106.3	79.3	81.1	100.1	100.4
D4ACG2	104.4	101.8	92.5	91.9	97	98.3	107.1	106.3
D4ACK1	108.8	116.1	95	96.2	87.8	89.8	94	100.2
D4ACQ9	85.7	92.8	93.4	93.6	105.5	103.4	96	98.7
D4ACV3	91.4	89.4	117.2	102.5	119.7	113.9	99.6	93.3
D4ACW1	111.8	116.7	93.7	103.8	88.3	90	94.1	90
D4ADC2	114.4	103	90.9	94.8	90.5	86.2	103.9	103.8
D4ADP9	108.2	107	98.1	89.9	86.7	89.1	97.9	104.8
D4ADT5	113.2	106.6	86.9	95.5	89.7	91	98.2	95.8
D4AE03	105.4	124.1	98.8	102.5	88.4	89.6	84.6	87.2
D4AE56	103.6	102.7	103.2	100	95.4	95.8	98.1	97.7
D4AEL3	97.7	102.8	102.4	105.3	85.8	83.2	96.5	101.6
E2CWF0	98.1	99.4	94.8	95.3	98.1	101.2	100.3	103.1
E9PST5	94	85.8	99.6	98.4	101.4	101.2	100.9	97
E9PT51	98.3	92.7	96.5	100.6	106.6	107.3	95.9	94.5
E9PTB2	112.5	114.4	92.5	99.5	89.5	89.7	96.6	105.6
E9PTI6	95.7	93.1	102.1	103.9	97.1	95.6	99.3	98.4
F1LM81	108.9	108.4	96.8	103.6	85.8	80.5	93.3	98.2
F1LMK2	110.5	112.5	89.4	95.6	75.5	78.3	108.5	106.9
F1LN73	75.2	90.3	80.5	87	73.5	73.1	115.8	125.8
F1LND1	123.2	108.6	78.3	91.4	89.4	86.7	109.5	120
F1LNW3	91.3	94.1	107.4	104.6	109.2	107.8	90.9	99.3
F1LP76	105.2	106.2	105	102.7	93.9	94.4	96.6	97.7
F1LPC6	116.4	109.5	125.1	107.1	84.3	78	97.4	102.7
F1LPG2	106.6	102.8	102.8	95.5	81.5	83.8	102.1	109
F1LPG9	112.3	106.5	104	105.7	89.8	83.7	99.8	96.5
F1LPK7	96	94.9	95.5	100.4	109.1	103.6	102.1	103.1
F1LPP6	86.2	84.2	100.8	106.4	113.2	104.9	110.4	110.1
F1LQ55	99.3	97	100.4	99.7	115.7	112.7	95	96.1
F1LQI1	108.6	117.7	99.9	93.3	97.2	96.9	91.7	94.9
F1LQZ4	89.3	88.6	102.9	108.7	94.6	97.5	95.4	93.5
F1LR10	100	99.6	105.1	105.1	102.7	100.2	96.3	91.7
F1LR39	119.2	109.8	112.8	111.1	93.1	91.2	94.3	103.8
F1LRY5	104.8	101	96.1	92	100.1	99.6	98	100.8
F1LS98	92.7	95.5	92.6	98.9	112.2	111.1	107	100.5
F1LT09	96	105.7	84.8	92.9	81.6	77.1	102.5	105.2
F1LT16	80	69	74.8	80.4	102	80.2	140	110.8
F1LT94	101.1	101.7	100.9	97.4	96.2	94.6	108.8	107.7
F1LTB8	89.9	64	125.3	114.5	123.4	116	101.2	92
F1LV46	125.5	114.9	92.4	88.1	100.6	96.8	93.7	93
F1LW22	109.9	115.8	94.8	105.3	78.9	86.1	100.4	96.1
F1LWS4	92.4	84.7	90.7	103.7	109	117.3	98.9	95.6
F1LX68	99.6	109.8	116	110.6	85.8	86	108.4	107.2
F1LXA9	141.9	117.3	90.5	87.4	86.5	87.5	86.8	93.9
F1LXD6	105.8	93.2	103.3	95	78	81.6	113.2	105.3
F1LXY6	65.7	74.8	100.5	127.6	91.9	88.1	121.8	109.9
F1LYR5	123	107.3	95.2	90.9	94.5	87.3	98	92.2
F1LZ05	97.5	95.5	104.7	101.5	102.4	102.2	96.1	99.4
F1LZF2	90.8	91.1	107.7	106.9	99.8	97.1	108	107.6
F1LZJ4	110.8	116.6	91.3	97.9	103.7	107.2	94.2	98.8
F1LZW6	102.3	100.9	97.1	98.9	104.3	104.7	99.4	97
F1M067	94.1	88	98.9	103.6	97.8	91.2	106.9	104.4
F1M265	95.3	91	99.5	102.7	97.7	99.1	105.6	102.8
F1M3W5	102.2	91.6	92.6	92.3	95.9	97.1	106.6	105
F1M5H6	94.3	95.5	111.4	132.6	95.2	104.9	87.9	87.2
F1M6T7	106.3	91.9	99.1	92.6	77.5	79	114.5	110.2
F1M6W2	93.6	94.5	99.8	100.8	90	90.5	114.6	105.2
F1M790	95.2	81.6	89.3	103.9	86.9	80.4	128.4	124.2
F1M7L9	113.8	106.8	91.9	91.1	90.8	86.3	102.1	113.7
F1M820	106.2	100.7	103.5	102.7	103.1	98.1	96.6	93.9
F1M953	99.7	96.4	104.3	102	105	103.2	96.7	101.9
F1M9W9	112.2	111.3	99.1	105.2	88.5	86.8	97.6	103.5
F1MA18	99.5	114.6	141.9	119.7	85.8	79.3	95.6	91.6
F1MA82	98.9	95	96.4	94.9	98	99	103.6	104.2
F1SW39	96.5	92.4	102.8	99.6	104.3	110.5	107.2	106.6
F7FDM3	114.5	121.7	102.8	99.1	92.1	80.5	100.2	101.8
F7FHF3	89.1	95.1	98.1	99	107.3	107.5	107.4	103.7
F7FHF7	120.3	108.5	95.1	99.7	95.8	97.8	102.5	103.1
F7FMY6	91.7	88.5	104.6	106	115.7	102.2	115.2	112.9
F8WFW5	108.5	108.1	101.1	102.3	90.7	85.7	98.8	101.3
G3V624	111.3	105.5	96	99.8	90.7	94.6	103.3	106.6
G3V637	89.1	75.9	107	107.3	101.6	100.2	120.7	106.7
G3V640	97.1	98.1	106.7	100.1	106.4	104.2	94.7	90.8
G3V644	108.1	115.7	103.2	103.6	103.1	101.8	89.9	96.1
G3V648	96.9	101.6	100.9	95.1	84.3	87.9	114.5	121.8
G3V662	95.6	88.9	85.4	88.2	87.6	89.2	111.2	108
G3V674	100.6	101.6	94	100.4	88	87.1	109.4	102.9
G3V678	91.8	93.5	108.4	106	103.8	96.6	102.1	102.1
G3V684	125.4	124.9	111.1	119.2	64.4	72.8	92.5	99.8
G3V6J2	104	94.8	141.6	127.7	80.1	79.4	84.3	82.4
G3V6K0	103.4	98	108.9	103.8	99.4	100.8	95.1	92.9
G3V6P6	100.8	103.4	107.6	122.2	84.6	89.8	83.5	92.8
G3V6T6	83.2	73.8	103	96.7	113	115.2	102.6	90.2
G3V6T7	92.9	94.5	106.6	104.4	104.8	98.9	101.9	98
G3V6Z2	102.9	105	81.2	95.6	96.6	94.8	120.7	121.6
G3V702	110.9	103.2	106	97.6	89.1	84.4	99.2	95.4
G3V734	81.9	94.7	106.4	109.5	112.4	124.8	101.7	95.2
G3V7I3	90.8	92.9	97.2	102	98.1	101.2	86.7	89.1
G3V7I9	116	102.9	89.8	93.3	91.2	91.9	109.5	104.1
G3V7L9	107.6	108.6	96.9	100.1	83.8	84.8	101.3	105.5
G3V7Q2	73.7	79.4	101.5	98	118.3	107.9	93	114.4
G3V7Q6	89.9	92.9	92.7	100	110	109.9	103.6	102.1
G3V7V5	88.7	92.5	104.5	104.7	94.8	98.9	102.8	110.6
G3V7V6	82.6	81	112.3	85.7	126.6	142.5	79.2	84
G3V827	104.6	100.7	101.2	97.3	97	96	96.4	94
G3V829	110.6	104.1	98.6	99.4	91.6	88.9	100.8	102.9
G3V837	99.3	94.4	96.3	96.3	108.4	110.7	96.9	96
G3V845	106.3	98.6	101.8	97.5	90.5	86.9	107.8	102.6
G3V888	145	146.2	83.1	84.8	92.8	109.3	87	68.1
G3V8B6	105.8	102.3	101.6	101.7	94.6	94.7	95.6	98.4
G3V8M1	106.9	125.9	109.1	114.5	79.4	78.6	99.3	98.2
G3V8M8	120.6	121.3	92.9	96.8	85.3	87.2	95.9	81.8
G3V8P5	82.2	88.7	92.7	96.6	96.5	94.6	112.7	102.6
G3V926	109.3	110.9	109.1	104.3	84	88.5	89.4	95.5
G3V940	104	100.8	104.8	102.3	93.7	91.3	96.4	99
G3V9G4	123.2	132.5	86.2	91.5	88.7	104.7	88.5	79.5
G3V9T9	96.6	95.6	108.2	108.7	92.6	89.7	102.4	101.4
G3V9U2	96.3	89	94.3	100.6	111.5	110.9	99.9	99.2
H2BF30	130.3	143.3	78	88	76	83.6	100.6	103.4
I6L9G6	95.2	93.1	104	99.6	101.9	98.8	101.5	104.5
M0R474	80.9	85.6	93.1	85.2	146.6	126.2	100.7	89.9
M0R5J4	104.7	105.8	97.5	101.6	103.4	107.9	98.4	94.3
M0R5R0	121.4	115.1	98.4	93.9	80.5	81.4	96.1	103.2
M0R629	101.3	101.3	92.2	96.3	117.6	115.3	92	92.9
M0R6K0	102.4	106.8	92.9	93	85.7	87	100.6	109.4
M0R6T4	98.4	104.1	94.5	107.1	82.8	85.7	110.9	111.4
M0R757	92.4	96.2	100.7	105.9	105.6	106.2	100.9	96.2
M0R7I0	104.2	101.7	97.4	94	84.8	88.6	97	95.4
M0R7M8	92.7	83.2	97.1	95	102.3	106.2	98.3	102.7
M0R959	119.5	112.4	79.7	94	80.5	77	85.9	96
M0RAK3	53.8	62.6	58.2	70.5	63.8	56	140.7	113.7
M0RAP6	91.6	89.7	80.6	88.4	78	71.3	105.5	128.9
M0RAY7	102.2	94.5	93.1	101.9	81	83.7	110.6	118.1
M0RC77	105.4	104	97.2	104.6	106.6	116.4	95.7	93.8
M0RCH6	97.2	93.1	106.3	115.2	93.6	90.1	94.2	98.4
M0RCU5	96.6	97.7	96.9	94.9	105.8	113.7	98.1	97.8
M0RDA4	117.7	105.8	102.9	96.8	84	80	96.7	101.6
M0RDF7	95.9	92.2	103.2	112.1	108.6	97.3	85.4	78.5
M3ZCQ0	137.9	151.9	69.6	89.8	73.6	88.9	91.3	106.6
O02949	95.3	96.3	98.8	109	85.5	76.3	108	102.4
O08719	82.2	78.7	118.7	121.8	98.6	99.2	107.7	102.4
O08776	124.4	119	89.6	100	76	71.1	75.6	89
O08836	119	127	110.4	99.6	87.8	82.5	105	109
O35077	95.9	99.2	95.2	98.4	106	110	99.9	95.2
O35078	98	91.4	105.1	107.5	124.5	112.5	84.9	94.8
O35244	102.9	100.9	101.8	96.5	102.3	101.3	96.2	96.6
O35263	106.6	102.8	97	99.2	94.5	91.3	98.5	97
O35264	112.8	125.9	91.2	98.4	71.2	80.9	99	111.2
O35303	96.4	88.4	90.6	86.9	92.1	93.3	108.4	108.1
O35964	100.7	100	102.8	101.7	92.6	91	104.1	106.5
O54698	72.6	79.2	71.4	83.6	82.7	75.4	133	138.3
O54892	96.6	103.5	126	110.1	83.7	82.8	97	94.9
O55166	117.6	100.3	73.1	68.3	68.3	65.9	85.8	101.7
O88763	96.6	103.7	114.7	108.7	85.3	82.2	101	105
O88813	106.9	110.2	97.3	91.8	106.6	114.8	94.7	87.7
O88989	116.4	112.5	89.9	95.9	102.7	104.8	92.8	86.5
P00481	98.2	95.8	92.7	95.2	105	107	105	103.1
P00507	100.4	94.8	103.6	98.9	104	103	97.6	99
P04638	131.9	168.2	91.8	76.4	83.6	94	100.3	88.7
P04762	97.3	97.4	93.9	99.5	110.5	103.4	95.2	98.5
P05370	132.4	111.2	108.4	95.3	79.8	83.7	93	89.5
P05544	96.6	100.4	92	93.4	102.3	99.9	111.2	106.7
P07340	90.1	87.4	100.6	93.3	105.6	102.1	108	114.3
P07687	75.7	86	107.1	96.4	122.8	108.5	106.6	111.9
P07824	112	110.7	88	96.6	101.1	107.9	92.2	95.4
P07871	82.4	91.3	122	110.6	129	131.3	91.3	101.1
P07872	88.9	86.6	101.6	104.1	127	120.1	88.4	99.1
P07896	93.4	86.3	101.1	101.1	120	116.7	96.9	97.2
P08011	92.3	78.4	93.2	102.2	109.3	107.4	96.1	98.1
P08082	120.5	123.3	110.8	100.4	89.2	87.2	92.6	95.8
P09034	138.2	110.9	79.9	86.7	98	101.6	92.4	86.5
P09139	110.1	111.5	91.1	95.4	93.5	97.7	96.6	102.8
P0C5Y8	87.8	84.9	90.3	89.4	75.9	76.6	113.5	106.5
P10687	104.3	103.6	110.7	116.7	92.4	89.5	87.6	84
P11030	126	152.8	81.8	85.2	90.9	113.7	91.1	74.6
P11654	92.8	85	95.5	102.9	90.4	85.6	103.7	105.2
P13803	102.5	100	96.1	99.4	103.6	103	100.3	101.3
P14046	83.3	91.4	92.1	94.4	103.1	105.1	118.1	117.4
P14408	93.8	96.1	98.7	97.2	108.9	111.1	104.8	96.4
P14604	104.5	98.1	95.9	101.4	106.4	104.8	97.6	96.8
P14669	90.5	83.5	109.3	119.9	95.9	89.7	108.6	102.1
P15257	112.8	121.3	97.2	102.6	89.7	85.3	99.7	97
P15429	112.6	109.6	77.4	94.9	80.3	76.2	110.5	125.7
P15650	97.3	99.8	94.5	94.5	101.3	102.1	105.8	102.4
P16232	103.9	97.2	101.5	108.6	125.9	115.8	76	88.3
P17078	74.5	82.7	102.7	111.5	100.4	119.2	114	111.1
P17425	133.5	113.3	97.1	86.9	97.3	111	88.1	85.6
P17764	87.4	92.4	105	106.5	108.2	119.4	96.2	93.1
P19225	77.8	80.1	120.9	100.4	121.1	105	104.1	109
P19234	104.1	107.8	111	110.7	91.5	88.5	90.9	96
P19468	95.8	83.4	97.3	96.3	107	112.1	102.1	109.9
P20595	130.9	113	82.4	93.6	64.7	60	78.4	98.5
P20814	124.1	129.1	106.8	104.3	108.4	109.4	67.8	72
P21272	110	110.6	106.7	109.3	83.1	86	93	107.9
P21571	96.5	101.2	96.1	104.9	117.1	111.8	97.5	97.2
P21775	89.3	93.3	100.8	94.8	124	116.9	93.1	89.5
P23640	85	88.2	107.1	107.2	100.4	106	106.7	100.8
P24329	104.7	102.5	96.3	97.5	103.3	101.1	99.3	102.8
P24470	89.6	88.7	96.1	100.6	111.3	106.4	103.9	105.9
P24473	103.8	103	93	86.2	99.5	106.9	99.9	102.6
P26817	94.2	96.7	109.4	115.8	97.1	94.7	102.9	102.7
P29067	82.1	89.5	130.4	147.6	115.8	112.5	113.5	96.2
P29266	89	88.3	102.2	104.3	119.5	108.6	99.3	102.7
P29418	97.5	92	92.5	104.5	117.7	109.9	99.1	96.3
P31044	107.2	109.2	99.4	95.2	98.3	101.7	97.8	95.8
P31399	97.8	94.6	97.6	104	112.9	109.3	96.2	94.9
P35467	96.5	89.9	114.3	94.7	80.6	78.5	114.1	109.8
P35559	92.8	96.3	101.8	99.4	105.3	104.1	102	100.1
P36506	91.5	97.6	103.8	107.6	104.1	102	95.8	94.7
P43165	113.8	113.7	92.8	103.9	99.1	93.1	87.8	90.1
P45479	86.8	81.9	111.9	101.8	105.6	105.4	111.7	105.3
P48500	109.2	102	96.2	94.9	101.3	101.5	102.5	97
P49445	134.2	100.3	79.8	93.5	74.7	68.1	112.4	112.1
P50123	105.5	100.1	96.2	91.2	102.6	103.6	100.2	95.1
P50398	102.9	97.6	96.4	95.4	101.7	103.7	103.9	99.3
P50545	103.3	86.5	86.9	99	62.9	62.8	99	92.3
P51583	111.3	109.6	98.1	92.2	101.2	98.5	93.9	97.9
P52020	153.3	164.4	104.9	86.7	69.9	64.7	79.1	87.5
P52555	93.1	93.9	110.5	107.7	103.9	96.8	100	94
P52759	107.2	109.2	86.3	95.1	97.3	93.8	98.6	99.9
P52944	77.8	87.8	102.6	101.9	114.6	105.4	108.2	105.5
P53534	83.4	90	115.9	104.3	98.7	92.9	108.6	111
P55009	78.8	68.4	124.6	148	96.9	92.4	105.1	100.4
P55051	82.5	76.5	127.1	105.3	143.1	130	85.1	84.5
P55797	98.4	102.4	100.1	100.8	110.4	114.8	95.5	96.9
P56574	79.2	77.2	117.3	99.2	122.9	115	99.7	108.9
P57113	108.8	103.4	93.4	89.3	98.4	100.5	99.9	99
P57790	111.1	89.7	131.6	122.5	86	85.6	79.9	87.2
P60123	103.6	97	111.5	107.3	92.8	95.7	96.8	97.6
P61314	80.4	79.8	96.1	103.3	107.4	105.5	110.3	110.9
P61589	86.2	95.4	101.4	101.4	111.7	107.7	103.7	102.6
P62243	90.7	93.5	107.5	102.2	103.2	102.5	99.6	100.6
P62246	100.2	101.3	97.5	99.4	104.1	102.2	99.1	97.9
P62332	86.1	91.3	96.3	98.7	106.8	122	116	115.2
P62755	90.3	83.1	102.6	103.8	102.9	103.5	104	100.5
P62836	85.6	84.7	89.6	98.6	110.3	111.2	106.7	95.9
P62890	99.4	99.4	91.4	94.7	93.3	92.3	103.1	105.9
P62994	95	96.4	103.1	99.4	103.6	102.7	97.6	93.2
P63039	97.1	97.5	100.3	102.9	109.1	106.8	97.2	97.4
P63164	97.2	101	109.2	111.3	96	90.5	95.7	93
P63255	101.4	97.4	101.4	94.3	85.3	85.5	107.8	107.3
P69736	104	108.1	103.9	101.8	90	90.9	98.4	94
P70709	121.8	113.5	89	94.1	88.5	80.9	107	111.7
P80386	109.9	114.9	92.1	96.3	97.3	101.8	106	104.5
P81155	99.4	91.8	99.9	101.5	108.9	106	101.1	97.8
P83006	91.8	95	111.3	108.9	97.7	99.5	112.4	104.9
P83868	93.6	89.4	98.3	97.5	106.6	100.7	102.3	102
P83953	101.3	94.2	82.1	84.4	92.4	94.5	107.8	103.3
P84092	102.5	101	94.5	99.8	90.1	89.9	102.4	108
P84817	93.5	91.6	106.3	100.1	110	108.5	103.3	93.9
P85968	120	135.4	94	87.6	89.2	99.5	92.8	82.7
P97524	89.4	91.5	99.7	108.5	104.2	108.7	100.6	105.4
P97544	109	106.5	93.3	100.4	89.9	87.2	99.3	107
Q00969	115.4	109.1	92.9	93.1	91.7	82.6	98.9	109.3
Q02769	164.3	139.1	89.7	86.7	85	81.9	94.3	79.9
Q03344	86.2	81.2	127.4	109.4	120.2	104.5	94.4	90
Q03626	77.8	91.7	100.2	92.6	104.9	105.6	119	119.7
Q06606	77.2	87.6	87.2	77.7	94.9	88.6	131.8	133.2
Q07014	88.3	92	106.6	98.9	95.9	95	106	107.4
Q09325	104.9	109.6	100.4	97.2	87	91.1	103.8	106.3
Q0Z843	111.8	120.4	105.1	100.8	93.2	88.5	88.5	88.2
Q0ZFS8	99	95.2	104.9	104.4	99.3	102.2	94.7	92.6
Q1HAQ0	93.5	103.6	136.4	138.4	97.4	97.8	97.1	113.7
Q2MHD9	105.4	102.7	102.1	100.2	105.9	104.2	98	94.7
Q32PX6	95.8	91.3	98.9	107.5	94	92	114.9	111.8
Q32PY7	90.8	82.5	87.7	96.5	97.6	94.7	105.8	104.8
Q32Q55	81.3	90.1	106.5	92.1	126.3	114.9	104.8	106
Q32Q88	117.6	109.8	101.3	103.5	91.6	90.2	100.2	98.2
Q3MHS3	165.7	144.2	74.5	68.1	75	60.4	101.5	76.5
Q3MIE5	115.6	116.5	82.2	88.6	56.9	71.1	78.2	94.8
Q3MIF4	102.2	100	98.2	97.7	101	101	100.3	99.5
Q3SWT7	117.9	126.3	133.3	119.6	87.7	95.4	111.3	104.8
Q497B0	103	107.6	99	97.6	103.2	107.9	96.8	92.8
Q498D5	97.3	97.5	95	99	102.5	104.1	103.9	103.5
Q499N5	126.2	136.9	92.1	95.8	81.4	84	88.2	93.6
Q499P2	93.3	92.3	103.1	104.9	99.8	101.8	108.3	103.6
Q499R7	101.7	102.1	95.5	92.9	106.6	109	100.4	97.7
Q4AE70	94.1	102.2	103.8	114.1	106.6	112.7	128.8	133.6
Q4FZT8	97.4	92.8	102.9	102.2	103.1	104.8	103.2	101.3
Q4FZT9	97.3	93.7	101.9	98.5	103.7	103.9	101.4	99.7
Q4FZV0	124.8	104.5	99.8	108.7	77.7	78.7	91.1	96.7
Q4FZV2	117.3	104.1	125.4	115.8	85.1	77.8	83.9	81.5
Q4G064	105.9	101.2	96.9	97.1	99.7	97	97.4	93.5
Q4KLK7	97.6	95.9	101.6	101.2	94.7	97.1	105	104.2
Q4KLN4	103.9	100.1	96.4	101.6	84.2	84.5	106.4	100.6
Q4KM07	106.3	93.7	95.6	91.9	111.3	114.4	91.7	97
Q4KM35	91	91.4	124.2	115.8	92.5	84.2	103.6	106.8
Q4QQS7	89.7	91.8	105.9	104.3	107.4	101.3	103.7	96.6
Q4QQV4	95.1	93.3	95.8	92.6	99	98.2	99.1	101
Q4QQV8	113.1	114.4	97.5	98.7	92.6	84.9	96.9	103.3
Q4V886	109.2	107.6	98.1	108.5	88.5	89	101.1	102.2
Q4V8E2	93.4	98.7	105	118.1	100.4	101.8	91.2	86.4
Q4V8H8	96.2	94.8	105.5	100.5	104.2	107.2	97.5	94.1
Q4V8I5	68.3	82.2	81.8	79.5	99.4	110.9	132.6	105
Q4VBH2	107.4	100.5	92.7	96.2	100.9	97.5	104.1	106
Q53AQ4	94	107.1	85.5	87.3	84.8	90.7	113.1	112.3
Q566C7	95	90.7	97.7	96.3	98.8	96.6	103.2	102.5
Q569C9	98.6	90.8	93	100.3	99.1	104.1	116.5	112.8
Q56A27	105.7	97.5	102.7	106.3	96.3	98	94.2	92.3
Q5BJP2	142.7	114.2	81.8	85.3	96.9	80.4	92.9	98.2
Q5BJP4	113.9	102.5	103.2	102.7	82.1	77.7	89.9	99.9
Q5BJQ0	95.1	95.5	94.6	99.9	109.2	108.8	104	99.7
Q5BJT0	92.8	87.9	118.4	107.2	94.4	97.1	93.9	96.2
Q5BJY6	113	127.1	89.1	96.6	80.2	76.7	101.6	112.1
Q5BJZ2	85.3	88.1	97.1	99.6	98.1	81.9	126.5	117.2
Q5D059	103.5	101.1	103.1	102.6	94.7	92.5	94.8	98.7
Q5EB77	77.4	74.5	95	111.5	112.6	121.2	110.3	116.2
Q5EB92	104.7	97	95.3	100.9	91	93.8	114.1	107.7
Q5FVC4	115.7	105.9	94.5	100.3	90.7	87.5	100.4	106.9
Q5FVL8	116.2	107.2	88.5	98.7	83.2	84.6	100.9	105.6
Q5FVM5	120.8	134.3	100	103.1	70	73.3	89	107.8
Q5FVM7	109.2	102.9	83.2	91.8	77.6	76.3	83.3	94.9
Q5FVQ8	106.4	102.1	108.6	105.5	90.6	92.3	96.4	102
Q5FWT9	182.3	115.8	75.9	107.3	54.8	48.3	81.8	88.8
Q5HZV9	107.6	106.1	96.1	97.4	92.8	92.3	106.1	102
Q5HZY0	92.7	93.3	98.6	105	115.3	108.4	104.1	99.4
Q5I0D5	96.8	103.8	95.7	98.2	113.2	119	95.4	93
Q5I0E2	97.1	96	89.7	87.6	82.3	80.1	96.9	111.3
Q5I0E7	97.3	94.6	104.9	102.3	103.2	105.2	106.3	100
Q5I0L3	90.1	90.7	95.7	96.3	97.2	101	103.3	103
Q5I0M3	96.1	95.3	104.3	104.8	99.3	95	108.1	105.8
Q5M7T9	122.3	116.4	97.7	93.1	87.7	84.9	92.3	98.8
Q5M883	93.7	102	116.8	124.4	97.4	95	100.5	101.5
Q5M8A0	71.1	74.6	77.4	81.9	116	95.6	135.5	117.6
Q5M9F3	130.9	105.3	93.5	92.2	82.6	80.1	104	103.7
Q5M9G1	113.3	104.4	92.1	99.1	89.2	85.1	98.5	104.2
Q5M9G8	96.3	89.4	103.3	105	105	108.2	93.9	98.2
Q5M9H2	100.7	95	99.6	101.4	103.3	102.9	97.8	101.5
Q5PPH0	81.9	84.6	104.6	104.5	109.5	102.8	103.4	96.8
Q5PPL3	96.7	99.8	105.1	102.1	112.6	109.1	91.4	93.6
Q5PQJ7	87.4	98.1	100.5	97	88.5	78.3	115.6	134.4
Q5PQN1	107.6	101	91.2	95.2	94	95.6	106.3	104.4
Q5PR00	102.9	108.4	87.6	92.2	97.6	95.6	100.4	96.5
Q5RJS6	83.7	77.3	97.6	109.1	109	111.4	101.7	107.2
Q5RKH0	110.7	109.8	103.5	102.4	100	94.7	91.2	97.2
Q5RKI5	95.4	96.1	99.3	103.8	98.1	100.4	105.9	106.2
Q5RKL4	120.8	105.6	90.3	92.5	99.5	97.1	96.6	97.1
Q5U1Y2	84.9	76.4	111.4	113	91.1	92.8	102.4	95.6
Q5U203	99.6	85.5	112	105.7	114.2	124.8	96.4	82.6
Q5U2U0	103.4	100.6	101.7	95	112.4	105.3	96.3	96.5
Q5U2U5	63.4	63.6	100.3	120.3	117.1	122.5	106.5	123.8
Q5U2X6	94.4	96.5	99.7	103.5	103.9	104.6	98.4	99.3
Q5U2Z4	97.1	99.6	102	107.4	84.3	85.5	101.2	104.6
Q5U300	98	97.7	98.2	98.6	101.1	102	104.4	101.2
Q5XFW8	91.3	92.6	94.7	98.1	101.2	98.7	106.1	102
Q5XFX0	77.3	89.9	117.5	119.8	101	103	107.2	98.8
Q5XI22	177.9	185	72.1	80.4	62.2	71.1	83.7	74.8
Q5XI26	108.4	100.9	98.7	101.8	85.8	89.2	97.7	103
Q5XI55	106.5	101.8	97	95.5	89.6	87.8	97.6	100.7
Q5XI60	89.6	79.9	104.7	112.4	101.5	89.6	106.1	110.2
Q5XI78	103.7	98	97.1	97.4	103.5	99.3	98.3	97
Q5XIB4	100.9	100.4	105.4	102.2	112.7	105.9	99.2	98
Q5XIC0	109.6	100.2	96.4	99.2	104.2	107.6	95.9	96.1
Q5XIE6	90.9	88.1	101	101.6	123.4	112.7	96.3	99.3
Q5XIG9	97.6	95.2	90.9	96.3	104.5	105.1	100.2	95.7
Q5XII0	121.1	108.2	97.5	95.9	89.4	88.9	91.8	100.9
Q5XIM0	122.3	104.9	88.9	93.9	89.8	84.4	101.3	103.4
Q5XIR9	115	111.5	96.7	98.1	82.5	83.9	95.6	110.9
Q5XIW8	109.1	106.3	114.9	108.6	93.6	89.7	90.8	98.9
Q62662	105.8	111.3	99.2	101.6	84.3	81.9	93.2	86.7
Q62737	110	128.8	188.8	132.3	75	72.3	101.4	92.7
Q62745	91.6	82.9	104.4	102.6	109.5	114.6	102	102.8
Q62967	128.4	139.5	84.6	88.5	84.4	80.3	85.8	81.7
Q63009	86.4	90.9	110	107.2	98.8	96.1	105.4	96.2
Q63150	104.8	98.3	95	96.8	102.9	102.4	100.6	96.6
Q63362	102	109.6	98.5	101.7	109.3	106.9	92.7	95.2
Q63483	105	103	90.6	79.2	76.5	72.3	87.9	99.2
Q63528	97.7	99.1	98.5	100.5	92.1	86.3	108.6	108.4
Q63699	92.4	79.1	84.5	88.3	68.6	72.5	99.9	111.3
Q63707	104.3	96.5	107.7	101.5	107.6	110.4	94.7	92.6
Q641Y5	91.7	90.5	106.4	108.8	99.4	92.3	99.5	96.9
Q64232	110.6	107.7	96.4	94.2	101.7	105.2	98.7	87.5
Q64350	85.4	83.8	98.8	103.4	109.3	111	109.2	98.3
Q64560	109.9	101.2	91.6	93.2	91.5	96.1	98.8	95.6
Q64602	112.4	100.5	94	88.9	107.8	108.9	93.7	89.9
Q64610	120	111.1	102.5	90.1	86.1	82.9	92.2	99.5
Q64648	100.7	102.3	105.9	97	111.9	108.9	83	81.3
Q64654	155.2	146.3	87.5	87.7	88.9	91.3	90.8	76.5
Q66H41	111.2	101.4	105.4	103	90.7	91.7	101	100.6
Q66H45	110.8	107	98	91.6	89.9	94.5	100.1	99
Q66H59	105.6	99.4	110.4	101.8	88.1	82.5	95.7	95.1
Q66HA1	108.9	116.4	113.2	127.8	91.3	78.5	92.1	99.6
Q66HA5	148.3	122.6	103.9	110.4	73	69.8	101	96.4
Q66HA8	104.2	101.8	101.9	100.7	97.7	95.5	99.6	97.3
Q66HF3	102.6	97.2	98.8	97.7	101.9	101.5	98.3	101.3
Q66HN6	133.9	37.1	25.6	35.3	30.8	45.4	217.7	242.9
Q66HT1	102.9	104.4	94.5	97.1	99	101.6	99.4	97.6
Q675A5	105.9	97.8	94.9	91.8	97.6	97.7	107.5	109.5
Q68FQ0	101.2	98.5	103.4	106.1	102.3	100.6	98.1	95.9
Q68FQ9	103.8	95.7	97.5	107.8	83	84.9	103.1	101.7
Q68FR2	82.5	87.8	114.3	101.3	90.5	94.1	112	113.6
Q68FT5	133.1	167.1	76.6	82.2	81.4	90.6	87.6	83.7
Q68FT9	104.2	103.7	100.3	97.7	99.7	102.5	91.8	93.7
Q68FW8	114.5	100.4	87.8	93	76.4	74.3	98.9	116
Q68FX4	80.6	81.9	110.6	115.5	100.4	91.5	111.2	97.6
Q6AXT8	110.2	93.2	115.3	118.3	107.4	104.4	90.5	90.9
Q6AXU7	107.7	98.6	93.8	94.9	99.7	100.3	102.2	101.6
Q6AXY8	81.5	78.2	86	101.9	109.1	115.5	111	109.6
Q6AY30	90.3	88.6	96.5	101.2	107	106.6	101.7	104.8
Q6AYC2	97.7	92	96.7	107.4	88.1	84.5	106.3	107.4
Q6AYF2	81.8	87.7	92.1	99.8	104	95.5	135	131.7
Q6AYL0	160.4	155.6	180.1	98.8	49.3	62.2	68.9	80.2
Q6AYM8	61.2	81.6	73.2	72.1	106.6	122	156.2	126.7
Q6AYP5	92.1	89.6	96.3	102.6	103.2	104.5	94.7	87.8
Q6AYR2	112.3	112.9	88.9	100.6	82.1	85.1	107.6	112.3
Q6AYS6	98.3	98.2	91.5	89.1	113.3	118.9	105.2	89.4
Q6AYS8	84.1	84.6	103.3	106.4	108.6	111.1	100.8	117.6
Q6AYT9	87	76.3	120.2	123	107.8	117	92.6	80.5
Q6DGG1	100	94.3	90.4	94.5	103.3	100.7	102.2	99.1
Q6GQY2	87.5	101.7	106.1	111.1	116.8	135.8	92.1	89.8
Q6IE70	114.1	112.6	98.5	92.4	85.5	81.1	105.9	106.6
Q6IRK3	108.5	106.6	99.7	95.9	87.2	83.8	103.8	105.3
Q6JE36	85.7	81	123.3	104.3	98	98.3	98.3	89.9
Q6MG06	107.8	107	96	94	91.9	88.6	94.8	96.5
Q6MG70	105.5	116.1	116.4	100.2	75.9	66.7	67.3	79.8
Q6MG73	91.6	93.5	91.5	100.5	98.5	93.1	113.4	114.9
Q6MGC3	90.1	99	119.6	124.7	78.6	71.6	92.7	114.2
Q6NYB8	89.8	90.2	114.4	121.3	83.8	86.2	110.3	95.6
Q6P3V9	77.8	88.6	109.1	108.7	104	107.6	105.1	100.5
Q6P502	96.7	96.4	103.7	100.3	103.6	101.6	101.9	98.3
Q6P6R2	101.3	98.3	96.3	97.5	110.1	107.6	97.9	97.2
Q6P6S2	119.7	110.3	106.7	95.9	78.1	80.8	97.9	91
Q6P762	101.9	94	98.5	93.7	110.4	107.2	97.5	100.2
Q6P7P5	98	99.6	114.6	129.2	103	98.5	92.1	91.3
Q6P9Y4	82.2	81.7	130.9	106.2	97.7	107	92.7	97.3
Q6PCT8	108.2	109.7	103.6	115	90.2	89.4	84.2	81.3
Q6PCT9	99	96.3	103.1	101.9	100.5	103.9	100.5	98.2
Q6QI88	100.1	92.2	94.8	97.4	92.6	93.5	105.1	109.6
Q6RJR6	92.7	83.3	85.9	95.4	99.2	100.2	118.8	105.7
Q6RUV5	96.1	93.9	101.6	98.3	98.2	98.8	106.7	102.7
Q6T5E9	84.1	87.7	113.3	105.8	125.8	107	95.5	103.9
Q6T5F0	79.8	82.4	110.4	98	126.3	107.6	86.5	98.2
Q6TA25	92.4	90.3	103.6	94.7	98.4	102.9	113.8	113.4
Q6TMG5	108.9	100	91.9	96.5	87.7	89.8	106.2	103.1
Q6TUD3	111.9	115.1	91.2	90.6	95	95.8	91.4	99.9
Q6TUG0	92.7	87.7	102.4	105.7	105.8	97	98.6	98
Q6U6G5	102.7	102	104.2	107.6	99.8	101.1	89.1	88.8
Q75Q41	120	119.7	113.5	98.1	94.1	94.1	91.5	97.2
Q76EQ0	106.3	112.4	91.8	90.2	106.8	106.7	104.3	97.8
Q7M0A0	108.8	96.4	146.8	110.8	108.5	88.3	74.7	67
Q7TP91	110.2	102.5	100.7	99	92.4	90.6	96.8	100.7
Q7TPJ1	87.4	87.1	106.2	122.8	94.4	90.6	105.8	100.5
Q7TSU1	111.9	105.9	97	92.7	86	87.6	95.3	97.2
Q80VX4	118.1	111.4	104.3	98.7	92.9	84.1	91.7	86.4
Q80W57	113.1	96.5	121.3	108.7	87.5	83.9	85.9	90.3
Q811S9	91.7	100.1	102.9	114.5	83.7	78.4	105.1	107.8
Q8CF97	110.9	103.4	95.1	101.4	87.8	85.5	102.7	105.4
Q8CG07	94.3	99.1	106.4	117.7	67.2	59.5	94.5	108.7
Q8CHM7	102.8	95	107.9	99.9	115.4	108.7	88.1	95.5
Q8K4B7	68.4	53.9	88.9	97.1	116.1	105.9	125.2	125.7
Q8R4U9	121.8	127.5	91	93.4	88	89.6	88.7	96.1
Q8VHK7	112.9	107	101.8	99	99	94	99.1	95.8
Q91WX0	87.9	94	125.9	117.5	85.5	80.6	91.9	76.5
Q91YB6	84.7	85.2	97.4	107.8	98	97.8	114.9	109.8
Q920G0	80.3	86.6	100	102.6	87.9	89.8	99.2	100.1
Q920P0	104.1	105.3	94.2	96.9	101.4	100.3	98.2	98.1
Q923V8	83.5	83.9	110.1	112	119.2	108	101.6	93.1
Q923Z2	92.4	92.5	107.2	99.2	105.9	101.6	103.9	100.2
Q925G0	67.9	94.2	138	168.6	86.4	84.2	72.8	87.6
Q99PV2	101.6	87.5	79.3	93.8	103.1	96.2	119.3	130.4
Q9EPJ3	109.6	105.6	101.1	104.3	96.3	94.6	99.4	97.4
Q9ER28	100.1	100.2	116.5	107.7	80.7	79.9	103.7	110
Q9ES38	88.1	93.9	106.5	110.2	134.8	134.5	76.6	86.4
Q9ESN0	97.5	98.8	114	120.6	84.6	86.3	102.8	92.2
Q9G898	117.1	107.5	103.2	105.8	85.4	79.3	94.2	90.5
Q9JHI3	107.4	103.7	90.2	88.5	97.8	94.5	100.7	96.7
Q9JJ46	92.7	80.8	116.3	116.8	105.4	101.1	114.2	98.1
Q9JLA3	90.1	95.2	103.9	103.7	103	101.8	102.9	103.3
Q9JLT6	95.8	97.6	88.7	92.2	83.7	79.8	107.4	124
Q9NQR8	101.8	100.4	99.2	101.5	110.4	104.6	99.3	91.7
Q9QYU2	91.5	79.3	101.5	103	110.7	100.2	97	98.9
Q9QZU7	108.1	108	92.4	96.6	97.3	102.1	100.7	96.3
Q9R1B1	87.4	95.5	98.8	109.6	101.7	105.5	130.7	127.2
Q9TQA6	68.5	76.6	170.3	134.9	92	94.1	89.6	108.6
Q9WUW2	107.8	103.4	112.3	101.6	86.8	88	88.5	89.9
Q9WV57	103.2	103.6	131.5	108.1	76.7	69.7	95.1	107.7
Q9WVK7	91.7	98.8	105.6	101.8	108.8	117.1	98.3	95.7
Q9WVR7	92.9	97.8	105.9	102.4	114.5	113.5	100.1	89.6
Q9WVS2	106.1	101.7	89.2	91.8	98.1	94.4	97.7	102.6
Q9Z0V5	94.8	89.9	97.5	104.1	102.9	101.2	101.5	100.2
Q9Z269	95.9	95.5	96.3	96.3	104.6	106.8	106.2	102.1
Q9Z2Y0	77	88	99.9	98.5	126.5	116.6	98.4	108.7
Q9Z2Z8	121	142.4	100	88.2	85.5	85.4	100.3	88.2
